# Supplementary material for: Silver-catalysed intramolecular hydroamination of alkynes with trichloroacetimidates
Source: Royal Society of Chemistry journal article supplement (doi:10.1039/c3cc45500a), 2013-01-01
Supplement: c3cc45500a.pdf [file c3cc45500a.pdf]

# Silver-catalysed intramolecular hydroamination of alkynes with trichloroacetimidates

Valerie H. L. Wong,<sup>a,b</sup> T. S. Andy Hor<sup>b</sup> and King Kuok (Mimi) Hii<sup>\*,a</sup>

Department of Chemistry, Imperial College London, South Kensington, London SW7 2AZ, U.K.

Department of Chemistry, National University of Singapore, 3 Science Drive 3, Singapore 117543.

## Supporting information

### General

Solvents were dried by passing through the columns of molecular sieves in a solvent purification system (Innovative Technology Inc.). Unless otherwise stated, materials obtained from commercial suppliers were used without purification. Preparative separations were performed on silica gel by column chromatography. TLCs were performed using silica gel 60 F<sub>254</sub> aluminium sheets and visualised with KMnO<sub>4</sub> solution or exposure to UV light ( $\lambda = 254$  nm). <sup>1</sup>H NMR (400 MHz) and <sup>13</sup>C NMR (100 MHz) spectra were recorded at 25 °C on Bruker Avance™ 400 spectrometers. Chemical shifts ( $\delta$ ) were reported in ppm, and *J* values in Hz. <sup>1</sup>H NMR spectra were referenced to residual proton resonances in deuterated CDCl<sub>3</sub> ( $\delta_{\text{H}} = 7.26$ ), and <sup>13</sup>C NMR spectra to CDCl<sub>3</sub> ( $\delta_{\text{C}} = 77.0$ ). High-resolution mass spectra (HRMS) were performed by the Mass Spectroscopy Service of Imperial College London on Micromass Autospec Premier, Micromass LCT Premier, or VG Platform II spectrometers. Elemental analyses were performed by the Analytical Services at London Metropolitan University, U.K.

**Table S1.** Optimization of catalytic conditions.

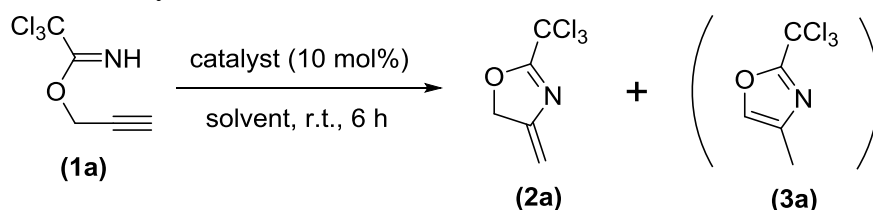

| Entry | Catalyst                        | Solvent | Conversion (%) | Yield of 2a (%) | Yield of 3a (%) |
|-------|---------------------------------|---------|----------------|-----------------|-----------------|
| 1     | AgOAc                           | DCE     | 51             | 21              | -               |
| 2     | AgTFA                           | DCE     | 100            | 14              | 15              |
| 3     | Ag <sub>2</sub> CO <sub>3</sub> | DCE     | NR             | -               | -               |
| 4     | Ag <sub>2</sub> O               | DCE     | NR             | -               | -               |
| 5     | AgNO <sub>3</sub>               | DCE     | NR             | -               | -               |
| 6     | Ag <sub>2</sub> SO <sub>4</sub> | DCE     | NR             | -               | -               |
| 7     | AgSbF <sub>6</sub>              | DCE     | 100            | 54              | -               |
| 8     | AgPF <sub>6</sub>               | DCE     | 37             | 13              | -               |
| 9     | AgBF <sub>4</sub>               | DCE     | 100            | -               | 16              |
| 10    | AgOTf                           | DCE     | 100            | -               | 46              |
| 11    | AgOTs                           | DCE     | 100            | 5               | 26              |
| 12    | [Ag(phen)][OTf]                 | DCE     | NR             | -               | -               |
| 13    | [Ag(py) <sub>2</sub> ][OTf]     | DCE     | 100            | 83              | -               |
| 14    | TfOH                            | DCE     | NR             | -               | -               |
| 15    | AgOAc                           | MeCN    | 36             | 8               | -               |
| 16    | AgTFA                           | MeCN    | 100            | 76              | -               |

|    |                                 |                                 |     |    |    |
|----|---------------------------------|---------------------------------|-----|----|----|
| 17 | Ag <sub>2</sub> CO <sub>3</sub> | MeCN                            | NR  | -  | -  |
| 18 | Ag <sub>2</sub> O               | MeCN                            | NR  | -  | -  |
| 19 | AgNO <sub>3</sub>               | MeCN                            | NR  | -  | -  |
| 20 | Ag <sub>2</sub> SO <sub>4</sub> | MeCN                            | NR  | -  | -  |
| 21 | AgSbF <sub>6</sub>              | MeCN                            | 100 | 28 | -  |
| 22 | AgPF <sub>6</sub>               | MeCN                            | 49  | 16 | -  |
| 23 | AgBF <sub>4</sub>               | MeCN                            | 100 | -  | 36 |
| 24 | AgOTf                           | MeCN                            | 100 | 18 | 15 |
| 25 | AgOTs                           | MeCN                            | 91  | 9  | 8  |
| 26 | [Ag(phen)][OTf]                 | MeCN                            | NR  | -  | -  |
| 27 | [Ag(py) <sub>2</sub> ][OTf]     | MeCN                            | 100 | 83 | -  |
| 28 | AgOAc                           | acetone                         | 30  | 9  | -  |
| 29 | AgTFA                           | acetone                         | 62  | 22 | -  |
| 30 | Ag <sub>2</sub> CO <sub>3</sub> | acetone                         | NR  | -  | -  |
| 31 | Ag <sub>2</sub> O               | acetone                         | NR  | -  | -  |
| 32 | AgNO <sub>3</sub>               | acetone                         | NR  | -  | -  |
| 33 | Ag <sub>2</sub> SO <sub>4</sub> | acetone                         | NR  | -  | -  |
| 34 | AgSbF <sub>6</sub>              | acetone                         | 82  | 37 | -  |
| 35 | AgPF <sub>6</sub>               | acetone                         | 27  | 5  | -  |
| 36 | AgBF <sub>4</sub>               | acetone                         | 100 | 37 | 5  |
| 37 | AgOTf                           | acetone                         | 100 | 40 | -  |
| 38 | AgOTs                           | acetone                         | 68  | 28 | -  |
| 39 | [Ag(phen)][OTf]                 | acetone                         | NR  | -  | -  |
| 40 | [Ag(py) <sub>2</sub> ][OTf]     | acetone                         | 100 | 87 | -  |
| 41 | TfOH                            | acetone                         | NR  | -  | -  |
| 42 | AgOAc                           | CH <sub>2</sub> Cl <sub>2</sub> | 51  | 26 | -  |
| 43 | AgTFA                           | CH <sub>2</sub> Cl <sub>2</sub> | 100 | 10 | 28 |
| 44 | Ag <sub>2</sub> CO <sub>3</sub> | CH <sub>2</sub> Cl <sub>2</sub> | NR  | -  | -  |
| 45 | Ag <sub>2</sub> O               | CH <sub>2</sub> Cl <sub>2</sub> | NR  | -  | -  |
| 46 | AgNO <sub>3</sub>               | CH <sub>2</sub> Cl <sub>2</sub> | NR  | -  | -  |
| 47 | Ag <sub>2</sub> SO <sub>4</sub> | CH <sub>2</sub> Cl <sub>2</sub> | NR  | -  | -  |
| 48 | AgSbF <sub>6</sub>              | CH <sub>2</sub> Cl <sub>2</sub> | 100 | 13 | 35 |
| 49 | AgPF <sub>6</sub>               | CH <sub>2</sub> Cl <sub>2</sub> | 40  | 15 | -  |
| 50 | AgBF <sub>4</sub>               | CH <sub>2</sub> Cl <sub>2</sub> | 100 | 12 | 22 |
| 51 | AgOTf                           | CH <sub>2</sub> Cl <sub>2</sub> | 100 | -  | 52 |
| 52 | AgOTs                           | CH <sub>2</sub> Cl <sub>2</sub> | 100 | -  | 38 |
| 53 | [Ag(phen)][OTf]                 | CH <sub>2</sub> Cl <sub>2</sub> | NR  | -  | -  |
| 54 | [Ag(py) <sub>2</sub> ][OTf]     | CH <sub>2</sub> Cl <sub>2</sub> | 100 | 83 | -  |
| 55 | AgOAc                           | THF                             | 46  | 9  | -  |
| 56 | AgTFA                           | THF                             | 73  | 15 | -  |
| 57 | Ag <sub>2</sub> CO <sub>3</sub> | THF                             | 66  | 4  | -  |
| 58 | Ag <sub>2</sub> O               | THF                             | NR  | -  | -  |
| 59 | AgNO <sub>3</sub>               | THF                             | NR  | -  | -  |
| 60 | Ag <sub>2</sub> SO <sub>4</sub> | THF                             | NR  | -  | -  |
| 61 | AgSbF <sub>6</sub>              | THF                             | 77  | 35 | -  |
| 62 | AgPF <sub>6</sub>               | THF                             | 26  | 3  | -  |

|    |                             |     |     |    |   |
|----|-----------------------------|-----|-----|----|---|
| 63 | AgBF <sub>4</sub>           | THF | 57  | 16 | - |
| 64 | AgOTf                       | THF | 96  | 51 | - |
| 65 | AgOTs                       | THF | 79  | 28 | - |
| 66 | [Ag(phen)][OTf]             | THF | NR  | -  | - |
| 67 | [Ag(py) <sub>2</sub> ][OTf] | THF | 100 | 75 | - |

### General Procedure for the Synthesis of the Propargylic Trichloroacetimidates (1a-c, 1e-g):

A solution of propargylic alcohol (1 equiv.) and trichloroacetonitrile (1.2 equiv.) in CH<sub>2</sub>Cl<sub>2</sub> (2.5 mL per mmol of propargylic alcohol) was cooled to 0 °C in an ice bath and DBU (0.1 equiv.) was added dropwise. The reaction mixture was allowed to stir at 0 °C for (t<sub>1</sub>) min, then warmed to room temperature and stirred for another (t<sub>2</sub>) min. The solvent was removed in vacuo, and the residue was purified by column chromatography.

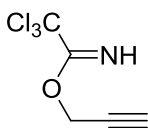

#### Prop-2-ynyl 2,2,2-trichloroacetimidate (1a): <sup>[1]</sup>

t<sub>1</sub> = 60, t<sub>2</sub> = 30. Purified by column chromatography (petroleum ether/ethyl acetate, 8:1), 3.11 g (78%) of **1a** was obtained as a colourless oil from 1.16 mL (20 mmol) of propargyl alcohol. <sup>1</sup>H NMR (400 MHz, CDCl<sub>3</sub>): δ = 8.50 (s, 1 H), 4.91 (d, *J* = 2.4, 2H), 2.55 (t, *J* = 2.4, 1H). <sup>13</sup>C NMR (100 MHz, CDCl<sub>3</sub>): δ = 161.82, 90.70, 77.06, 75.06, 56.57. MS [CI]: *m/z* (%) = 198 (100) [M-H]<sup>+</sup>.

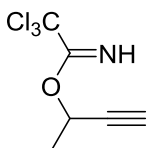

#### 1-Methylprop-2-ynyl 2,2,2-trichloroacetimidate (1b): <sup>[1]</sup>

t<sub>1</sub> = 60, t<sub>2</sub> = 60. Purified by column chromatography (petroleum ether/ethyl acetate, 10:1), 3.43 g (80%) of **1b** was obtained as a colourless oil from 1.57 mL (20 mmol) of 3-butyn-2-ol. <sup>1</sup>H NMR (400 MHz, CDCl<sub>3</sub>): δ = 8.48 (s, 1 H), 5.54 (dq, *J* = 6.7, 2.1, 1H), 2.52 (d, *J* = 2.1, 1H), 1.64 (d, *J* = 6.7, 3H). <sup>13</sup>C NMR (100 MHz, CDCl<sub>3</sub>): δ = 161.43, 91.06, 81.36, 73.59, 64.92, 20.83. MS [CI]: *m/z* (%) = 214 (100) [M+H]<sup>+</sup>.

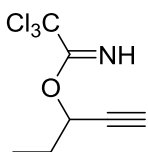

#### 1-Ethylprop-2-ynyl 2,2,2-trichloroacetimidate (1c):

t<sub>1</sub> = 60, t<sub>2</sub> = 120. Purified by column chromatography (petroleum ether/ethyl acetate, 8:1), 1.42 g (52%) of **1c** was obtained as a colourless oil from 1.00 g (11.9 mmol) of 1-pentyn-3-ol. <sup>1</sup>H NMR (400 MHz, CDCl<sub>3</sub>): δ = 8.46 (s, 1H), 5.39 (td, *J* = 6.4, 2.2, 1H), 2.52 (d, *J* = 2.2, 1H), 1.97 (m, 2H), 1.10 (t, *J* = 7.4, 3H). <sup>13</sup>C NMR (100 MHz, CDCl<sub>3</sub>): δ = 161.63, 91.19, 80.29, 74.14, 69.76, 27.81, 9.26. MS [CI]: *m/z* (%) = 228 (100) [M+H]<sup>+</sup>.

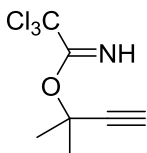

**1,1-Dimethylprop-2-ynyl 2,2,2-trichloroacetimidate (1e):** <sup>[1]</sup>

$t_1 = 60$ ,  $t_2 = 300$ . Purified by column chromatography (petroleum ether/ethyl acetate, 10:1), 1.22 g (27%) of **1e** was obtained as a colourless oil from 1.94 mL (20 mmol) of 2-methyl-3-butyn-2-ol. <sup>1</sup>H NMR (400 MHz, CDCl<sub>3</sub>):  $\delta = 8.56$  (s, 1H), 2.61 (s, 1H), 1.81 (s, 6H). <sup>13</sup>C NMR (100 MHz, CDCl<sub>3</sub>):  $\delta = 159.82$ , 91.94, 83.89, 75.34, 73.28, 28.56 ppm. MS [CI]:  $m/z$  (%) = 228 (100) [M+H]<sup>+</sup>.

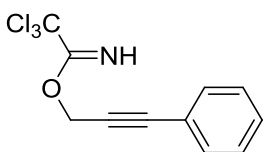

**3-Phenylprop-2-ynyl 2,2,2-trichloroacetimidate (1f):**

$t_1 = 60$ ,  $t_2 = 90$ . Purified by column chromatography (petroleum ether/ethyl acetate, 8:1), 1.72g (78%) of **1f** was obtained as a colourless oil from 1.0 mL (8.0 mmol) of 3-phenyl-2-propyn-1-ol. <sup>1</sup>H NMR (400 MHz, CDCl<sub>3</sub>):  $\delta = 8.51$  (s, 1H), 7.49 (dd,  $J = 7.5$ , 2.2, 2H), 7.37-7.29 (m, 3H), 5.15 (s, 2H). <sup>13</sup>C NMR (100 MHz, CDCl<sub>3</sub>):  $\delta = 161.98$ , 131.98, 128.87, 128.33, 122.10, 90.95, 87.23, 82.29, 57.58. MS [CI]:  $m/z$  (%) = 229 (100), 133 (86), 246 (62). (M<sup>+</sup> not observed)

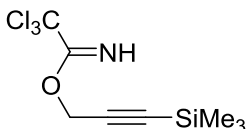

**3-(Trimethylsilyl)prop-2-ynyl 2,2,2-trichloroacetimidate (1g):**

$t_1 = 60$ ,  $t_2 = 60$ . Purified by column chromatography (petroleum ether/ethyl acetate, 8:1), 1.97 g (93%) of **1g** was obtained as a colourless oil from 1.0 g (7.8 mmol) of 3-(trimethylsilyl)propargyl alcohol. <sup>1</sup>H NMR (400 MHz, CDCl<sub>3</sub>):  $\delta = 8.45$  (s, 1H), 4.91 (s, 2H), 0.19 (s, 9H). <sup>13</sup>C NMR (100 MHz, CDCl<sub>3</sub>):  $\delta = 161.87$ , 98.22, 92.99, 90.86, 54.73, -0.30. MS [CI]:  $m/z$  (%) = 272 (100) [M+H]<sup>+</sup>.

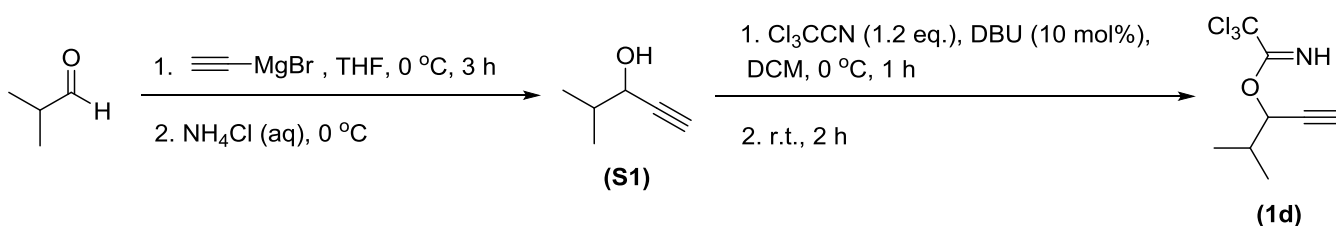

**1-Methyl-4-pentyn-3-ol (S1):** <sup>[2]</sup>

A solution of isobutyraldehyde (0.91 mL, 10 mmol, 1.0 equiv.) in dry THF (25 mL) and added to a solution of ethynylmagnesium bromide (0.5 M in THF, 30 mL, 15 mmol) at 0 °C. After 3 h, the reaction was quenched by addition of saturated aq. NH<sub>4</sub>Cl solution (50 mL) at 0 °C. Volatile components of the reaction mixture were removed under reduced pressure, and Et<sub>2</sub>O (50 mL) was then added. The organic layer was separated, washed with brine (50 mL) and dried over Na<sub>2</sub>SO<sub>4</sub>. The solvent was removed in vacuo, to furnish 1-methyl-4-pentyn-3-ol (S1) as an orange oil, which was used in the next step without further purification. <sup>1</sup>H NMR (400 MHz, CDCl<sub>3</sub>):  $\delta = 4.20$  (dd,  $J = 5.8$ , 2.1, 1H), 2.48 (d,  $J = 2.1$ , 1H), 1.96-1.86 (m, 1H), 1.80 (br s, 1H), 1.04 (dd,  $J = 7.8$ , 6.8, 6H).

**1-(1-Methylethyl)-prop-2-ynyl 2,2,2-trichloroacetimidate (1d):**

A mixture of **S1** (0.60 g, 6.11 mmol) and trichloroacetonitrile (0.74 mL, 7.34 mmol, 1.2 equiv.) dissolved in CH<sub>2</sub>Cl<sub>2</sub> (15 mL) was cooled to 0 °C in an ice bath, to which DBU (90 µL, 0.61 mmol, 0.1 equiv.) was added dropwise. The reaction mixture was allowed to stir at 0 °C for 1 h, then warmed to room temperature and stirred for another 2 h. The mixture was evaporated, and the resulting brown oil residue was chromatographed on silica using petroleum ether/ethyl acetate (8:1) as eluting solvent. 0.75 g (50%) of **1d** was obtained as a light yellow oil. <sup>1</sup>H NMR (400 MHz, CDCl<sub>3</sub>): δ = 8.45 (s, 1H), 5.26 (dd, *J* = 5.6, 2.2, 1H), 2.50 (d, *J* = 2.2, 1H), 2.25-2.13 (m, 1H), 1.10 (dd, *J* = 9.3, 6.7, 6H). <sup>13</sup>C NMR (100 MHz, CDCl<sub>3</sub>): δ = 161.69, 91.27, 79.16, 74.65, 73.59, 32.42, 17.92, 17.66. MS [CI]: *m/z* (%) = 242 (28) [M+H]<sup>+</sup>.

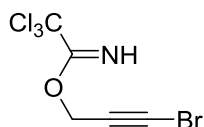

### 3-Bromoprop-2-ynyl 2,2,2-trichloroacetimidate (**1h**):

A mixture of propargyl alcohol (1.16 mL, 20 mmol, 1.0 equiv.), *N*-bromosuccinimide (3.92 g, 22 mmol, 1.1 equiv.) and silver nitrate (0.34 g, 2.0 mmol, 0.1 equiv.) in acetone (50 mL) was stirred at room temperature for 2 h. The solvent was removed in vacuo and the residue dissolved in water (50 mL). The resulting solution was extracted with Et<sub>2</sub>O (2 × 50 mL), and the combined organic extracts washed with brine, dried over Na<sub>2</sub>SO<sub>4</sub>, filtered and concentrated to afford the bromopropargylic alcohol as a colourless oil, to which CH<sub>2</sub>Cl<sub>2</sub> (50 mL) and trichloroacetonitrile (2.4 mL, 24 mmol, 1.2 equiv.) were added. The solution was cooled to 0 °C in an ice bath, before DBU (0.3 mL, 2.0 mmol, 0.1 equiv.) was added dropwise. The reaction mixture was allowed to stir at 0 °C for 1 h, then warmed to room temperature and stirred for another 3 h. The solvent was then evaporated, and the resulting brown oil chromatographed on silica using petroleum ether/ethyl acetate (8:1) as eluting solvent, to furnish 3.34 g (60%) of **1h** as a light yellow oil. <sup>1</sup>H NMR (400 MHz, CDCl<sub>3</sub>): δ = 8.49 (s, 1H), 4.93 (s, 2H). <sup>13</sup>C NMR (100 MHz, CDCl<sub>3</sub>): δ = 161.77, 90.68, 73.48, 57.45, 48.18. MS [CI]: *m/z* (%) = 280 (83) [M+H]<sup>+</sup>.

### General procedure for the preparation of homopropargyl trichloroacetimidates (**1i-k**):

A solution of homopropargyl alcohol (1 equiv., 20 mmol) and trichloroacetonitrile (1.2 equiv., 24 mmol) in CH<sub>2</sub>Cl<sub>2</sub> (50 mL) was cooled to 0 °C in an ice bath and DBU (0.1 equiv., 2 mmol) was added dropwise. The reaction mixture was allowed to stir at 0 °C for (*t*<sub>1</sub>) min, then warmed to room temperature and stirred for another (*t*<sub>2</sub>) min. The solvent was removed in vacuo, and the residue chromatographed on silica.

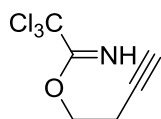

### But-3-ynyl 2,2,2-trichloroacetimidate (**1i**):

This compound was previously reported by Shin *et al.*<sup>[3]</sup> but no experimental details and spectroscopic data were given. *t*<sub>1</sub> = 60, *t*<sub>2</sub> = 60. Purified by column chromatography (petroleum ether/ethyl acetate, 10:1) on silica, 3.28 g (76%) of **1i** was obtained as a colourless oil from 1.51 mL (20 mmol) of 3-butyne-1-ol. <sup>1</sup>H NMR (400 MHz, CDCl<sub>3</sub>): δ = 8.35 (s, 1H), 4.40 (t, *J* = 7.0, 2H), 2.68 (td, *J* = 7.0, 2.7 Hz, 2H), 2.01 (t, *J* = 2.7, 1H). <sup>13</sup>C NMR (100 MHz, CDCl<sub>3</sub>): δ = 162.53, 91.19, 79.60, 70.14, 66.81, 18.50. MS [CI]: *m/z* (%) = 214 (100) [M+H]<sup>+</sup>.

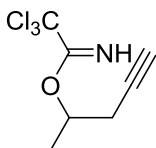

**1-Methyl-but-3-ynyl 2,2,2-trichloroacetimidate (1j):**

$t_1 = 60$ ,  $t_2 = 360$ . Purified by column chromatography (petroleum ether/ethyl acetate, 5:1) on silica, 3.71 g (81%) of **1j** was obtained as a colourless oil from 1.90 mL (20 mmol) of 4-pentyn-2-ol.  $^1\text{H}$  NMR (400 MHz,  $\text{CDCl}_3$ ):  $\delta = 8.31$  (s, 1H), 5.17 - 5.09 (m, 1H), 2.68-2.54 (m, 2H), 2.02 (t,  $J = 2.7$ , 1H), 1.47 (d,  $J = 6.3$ , 3H).  $^{13}\text{C}$  NMR (100 MHz,  $\text{CDCl}_3$ ):  $\delta = 161.94$ , 91.59, 79.47, 73.63, 70.62, 24.87, 18.33. MS [CI]:  $m/z$  (%) = 228 (100)  $[\text{M}+\text{H}]^+$ .

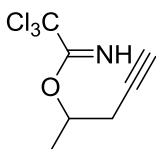

**1-Ethyl-but-3-ynyl 2,2,2-trichloroacetimidate (1k):**

$t_1 = 60$ ,  $t_2 = 60$ . Purified by column chromatography (petroleum ether/ethyl acetate, 5:1) on silica, 2.37 g (96%) of **1k** was obtained as a colourless oil from 1.0 g (10.2 mmol) of 5-hexyn-3-ol.  $^1\text{H}$  NMR (400 MHz,  $\text{CDCl}_3$ ):  $\delta = 8.32$  (s, 1H), 5.02-4.96 (m, 1H), 2.64 - 2.62 (m, 2H), 2.00 (t,  $J = 2.7$ , 1H), 1.91 - 1.86 (m, 2H), 1.01 (t,  $J = 7.5$ , 3H).  $^{13}\text{C}$  NMR (100 MHz,  $\text{CDCl}_3$ ):  $\delta = 162.27$ , 91.71, 79.47, 78.01, 70.48, 25.72, 22.50, 9.41. MS [CI]:  $m/z$  (%) = 242 (100)  $[\text{M}+\text{H}]^+$ .

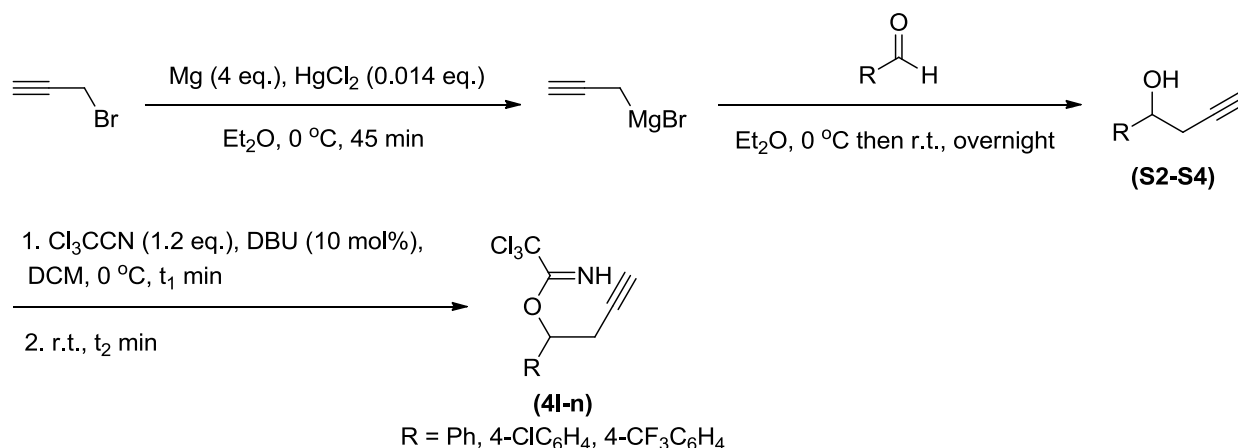

**General procedure for the preparation of homopropargyl alcohols (S2-S4):**

Propargylmagnesium bromide was prepared by a modified literature procedure:<sup>[4]</sup> A mixture of Mg turnings (1.94 g, 80 mmol) and HgCl<sub>2</sub> (75 mg) in dry Et<sub>2</sub>O (20 mL) were stirred at room temperature for 30 min. Propargyl bromide (80% solution in toluene, 1.0 mL, 6.72 mmol) was added in one portion to initiate the reaction (indicated by a slight exotherm). The reaction mixture was cooled to 0 °C in an ice bath, and another 5.0 mL of propargyl bromide (80% solution in toluene, 33.6 mmol) was added dropwise over 30 min. Stirring was continued for another 45 min at 0 °C, after which the solution was decanted into a solution of the corresponding aldehyde (20 mmol) in Et<sub>2</sub>O (15 mL) at 0 °C. The ice bath was removed, and reaction mixture stirred overnight at room temperature. The reaction was quenched by the addition of 40 mL of saturated aq. NH<sub>4</sub>Cl at 0 °C. The aqueous layer was extracted with 3 × 40 mL of Et<sub>2</sub>O, and the combined organic extracts washed with brine, dried over Na<sub>2</sub>SO<sub>4</sub>, filtered and concentrated in vacuo. The crude homopropargyl alcohols S2-S4 were obtained as orange oils, which were used in the next steps without further purification.

### General Procedure for the synthesis of the homopropargyl trichloroacetimidates (1l-n):

A solution of homopropargyl alcohol S2-S4 (1 equiv., 10 mmol) and trichloroacetonitrile (1.2 equiv., 12 mmol) in  $\text{CH}_2\text{Cl}_2$  (25 mL) was cooled to 0 °C in an ice bath and DBU (0.1 equiv., 1 mmol) was added dropwise. The reaction mixture was allowed to stir at 0 °C for 15 min, then warmed to room temperature and stirred for further 4 h. The solvent was removed in vacuo, and the residue chromatographed on silica.

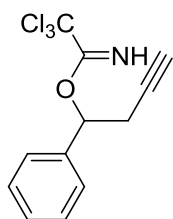

#### 1-Phenyl-but-3-ynyl 2,2,2-trichloroacetimidate (1l):

Purified by column chromatography (petroleum ether/ethyl acetate, 6:1), 1.88 g (65%) of **1l** was obtained as a white crystalline solid.  $^1\text{H}$  NMR (400 MHz,  $\text{CDCl}_3$ ):  $\delta$  = 8.39 (s, 1H), 7.49 - 7.46 (m, 2H), 7.41-7.32 (m, 3H), 5.99 (t,  $J$  = 6.6, 1H), 2.97 - 2.79 (m, 2H), 2.00 (t,  $J$  = 2.7, 1H).  $^{13}\text{C}$  NMR (100 MHz,  $\text{CDCl}_3$ ):  $\delta$  = 161.40, 138.48, 128.47, 126.34, 91.43, 79.22, 78.25, 70.88, 26.63 ( $\text{CCl}_3$  was too broad to be detected). MS [CI]:  $m/z$  (%) = 257 (100), 274 (94), 145 (86). ( $\text{M}^+$  not observed)

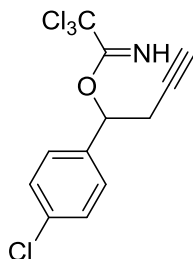

#### 1-(4-Chlorophenyl)-but-3-ynyl 2,2,2-trichloroacetimidate (1m):

This compound was previously reported by Shin *et al.*<sup>[3]</sup> but no experimental details and spectroscopic data were given. Purified by column chromatography (petroleum ether/ethyl acetate, 10:1), 1.36 g (42%) of **1m** was obtained as an orange oil.  $^1\text{H}$  NMR (400 MHz,  $\text{CDCl}_3$ ):  $\delta$  = 8.39 (s, 1H), 7.42 - 7.34 (m, 4H), 5.93 (t,  $J$  = 6.6 Hz, 1H), 2.94-2.77 (m, 2H), 2.00 (t,  $J$  = 2.6, 1H).  $^{13}\text{C}$  NMR (100 MHz,  $\text{CDCl}_3$ ):  $\delta$  = 161.25, 136.89, 134.36, 128.69, 127.85, 91.24, 78.75, 71.22, 26.41 ( $\text{CCl}_3$  was too broad to be detected). MS [CI]:  $m/z$  (%) = 181 (100), 164 (31), 364 (26). ( $\text{M}^+$  not observed)

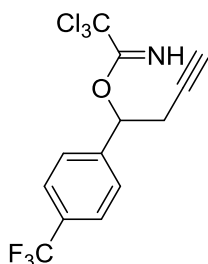

#### 1-(4-Trifluoromethylphenyl)-but-3-ynyl 2,2,2-trichloroacetimidate (1n):

After column chromatography (petroleum ether/ethyl acetate, 10:1) on silica, 1.56 g (44%) of **1n** was obtained as an orange oil.  $^1\text{H}$  NMR (400 MHz,  $\text{CDCl}_3$ ):  $\delta$  = 8.42 (s, 1H), 7.66-7.58 (m, 4H), 6.01 (t,  $J$  = 6.4, 1H), 2.97-2.80 (m, 2H), 2.01 (t,  $J$  = 2.7, 1H).  $^{13}\text{C}$  NMR (100 MHz,  $\text{CDCl}_3$ ):  $\delta$  = 161.21, 142.33, 130.63 (q,  $J$  = 32.4 Hz), 126.72, 125.50, 125.47, 122.64, 91.12, 78.46, 71.47, 26.40. MS [CI]:  $m/z$  (%) = 371 (100), 215 (34). ( $\text{M}^+$  not observed)



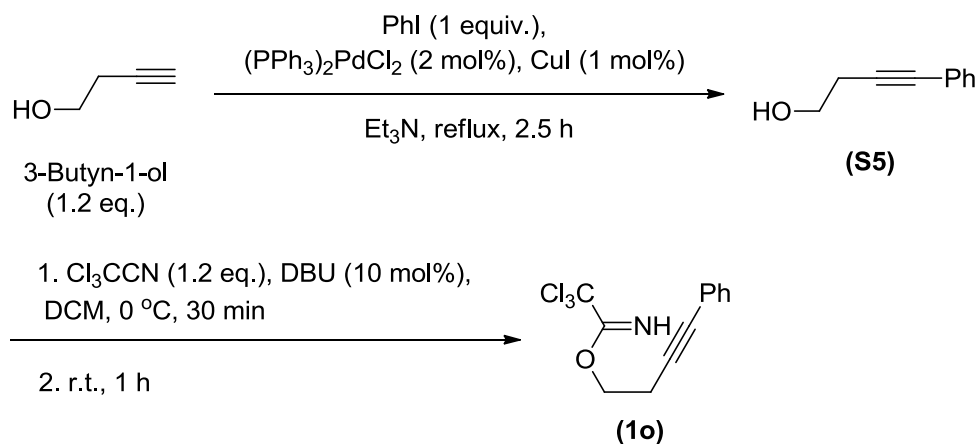

#### Preparation of 4-phenyl-3-butyn-1-ol (S5): <sup>[5]</sup>

A mixture of *bis*(triphenylphosphine)palladium(II) dichloride (0.0147 g, 0.02 mmol, 2 mol%), copper(I) iodide (0.0019 g, 0.01 mmol, 1 mol%), iodobenzene (0.11 mL, 1.0 mmol, 1 equiv.) and 3-butyn-1-ol (0.09 mL, 1.2 mmol, 1.2 equiv.) was dissolved in dry Et<sub>3</sub>N (6 mL) and refluxed for 2.5 h. The dark brown solution was diluted with an ethyl acetate/water mixture (1:1.25 mL), and the resultant biphasic solution was separated. The organic layer was washed with water and then brine, dried over anhydrous sodium sulfate, filtered and concentrated in vacuo. The resulting orange oil was purified by column chromatography on silica gel to afford 0.86 g (59%) of S5 as a light yellow oil. <sup>1</sup>H NMR (400 MHz, CDCl<sub>3</sub>): δ = 7.48 - 7.40 (m, 2H), 7.36 - 7.27 (m, 3H), 3.84 (t, *J* = 6.3, 2H), 2.72 (t, *J* = 6.3, 2H), 1.82 (br s, 1H).

#### 4-Phenyl-but-3-ynyl 2,2,2-trichloroacetimidate (1o):

A solution of S5 (0.86 g, 5.88 mmol, 1.0 equiv.) and trichloroacetonitrile (0.71 mL, 7.06 mmol, 1.2 equiv.) in CH<sub>2</sub>Cl<sub>2</sub> (15 mL) was cooled to 0 °C in an ice bath, and DBU (88 μL, 0.59 mmol, 0.1 equiv.) was added dropwise. The reaction mixture was allowed to stir at 0 °C for 30 min, then warmed to room temperature and stirred for another 1 h. The solvent was evaporated, and the resultant brown oil chromatographed on silica using petroleum ether/ethyl acetate (6:1). 1.59 g (93%) of **1o** was obtained as a light yellow crystalline solid. <sup>1</sup>H NMR (400 MHz, CDCl<sub>3</sub>): δ = 8.37 (s, 1H), 7.41 - 7.37 (m, 3H), 7.30 - 7.28 (m, 2H), 4.49 (t, *J* = 7.0, 2H), 2.92 (t, *J* = 7.0, 2H). <sup>13</sup>C NMR (100 MHz, CDCl<sub>3</sub>): δ = 162.64, 131.64, 127.96, 123.38, 91.30, 85.04, 82.23, 67.07, 19.47. MS [CI]: *m/z* (%) = 290 (33) [M+H]<sup>+</sup>.

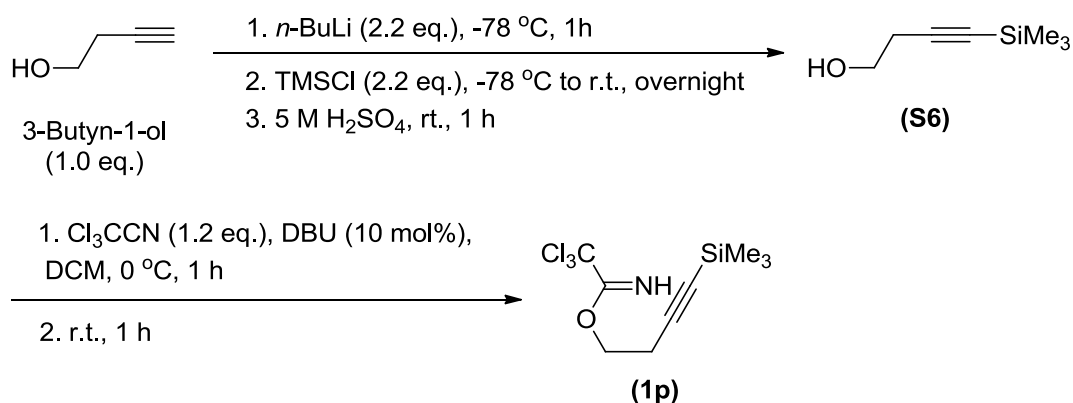

#### Synthesis of 4-(trimethylsilyl)but-3-yn-1-ol (S6): <sup>[5], [6]</sup>

*n*-BuLi (1.6 M in hexane, 27.5 mL, 44 mmol, 2.2 equiv.) was added dropwise to a solution of 3-butyn-1-ol (1.5 mL, 20 mmol, 1.0 equiv.) in dry THF (25 mL) at -78 °C. After stirring for 1 h, the yellow suspension was allowed to warm to room temperature, before cooling down again to -78 °C, whereupon trimethylchlorosilane (5.6 mL, 44 mmol, 2.2 equiv.) was added dropwise. The cooling bath was removed, and the reaction was stirred overnight at room temperature. The reaction was quenched by the dropwise



addition of 5M H<sub>2</sub>SO<sub>4</sub> at 0 °C; stirring for 1 h to ensure complete hydrolysis of the TMS-ether. The aqueous layer was then separated and extracted with Et<sub>2</sub>O (2 x 10mL). The combined organic layers was washed with water (10 mL) and brine (10 mL), dried over MgSO<sub>4</sub>, filtered and concentrated under reduced pressure to give 1.89 g (66%) of S6 as a light yellow oil, which was used for the next step without further purification. <sup>1</sup>H NMR (400 MHz, CDCl<sub>3</sub>): δ = 3.71 (t, *J* = 6.3, 2H), 2.50 (t, *J* = 6.3 Hz, 2H), 1.74 (s, 1H), 0.16 (s, 9H).

#### 4-(Trimethylsilyl)but-3-ynyl 2,2,2-trichloroacetimidate (1p):

A solution of S6 (1.77 g, 12.4 mmol, 1.0 equiv.) and trichloroacetonitrile (1.50 mL, 14.9 mmol, 1.2 equiv.) in CH<sub>2</sub>Cl<sub>2</sub> (30 mL) was cooled to 0 °C in an ice bath and DBU (0.18 mL, 1.24 mmol, 0.1 equiv.) was added dropwise. The reaction mixture was allowed to stir at 0 °C for 1 h, then warmed to room temperature and stirred for another 1 h. The solvent was evaporated, and the resulting brown oil chromatographed on silica using petroleum ether/ethyl acetate (8:1) as eluting solvent. 2.90 g (81%) of **1p** was obtained as a white crystalline solid. <sup>1</sup>H NMR (400 MHz, CDCl<sub>3</sub>): δ = 8.33 (s, 1H), 4.38 (t, *J* = 7.0 Hz, 2H), 2.71 (t, *J* = 7.0 Hz, 2H), 0.13 (s, 9H). <sup>13</sup>C NMR (100 MHz, CDCl<sub>3</sub>): δ = 162.59, 101.77, 91.27, 86.75, 66.94, 19.85, -0.02. MS [CI]: *m/z* (%) = 286 (100) [M+H]<sup>+</sup>.

#### Synthesis of bis(pyridine)silver(I) trifluoromethane sulfonate [Ag(py)<sub>2</sub>]OTf:

The complex was prepared using the general method published by Lee *et al.*:<sup>[7]</sup> A mixture of silver(I) trifluoromethanesulfonate (0.12 g, 0.5 mmol) and pyridine (5 mL) was stirred at room temperature overnight. The solvent was then evaporated and the residue dissolved in CH<sub>2</sub>Cl<sub>2</sub> (10 mL) and filtered through a plug of Celite. The filtrate was evaporated, and Et<sub>2</sub>O (20 mL) added to the residue, to precipitate the desired product as a white solid, which was collected by filtration and dried in vacuo (0.14 g, 69% yield). Spectroscopic data are in accordance with that reported in the literature.<sup>[8]</sup> <sup>1</sup>H NMR (400 MHz, CDCl<sub>3</sub>): δ = 8.73 (m, 4 H), 7.82 (m, 2 H), 7.42 (m, 4H). <sup>13</sup>C NMR (100 MHz, CDCl<sub>3</sub>): δ = 152.01, 138.86, 125.25 ppm. Anal. Calc. for C<sub>11</sub>H<sub>10</sub>AgF<sub>3</sub>N<sub>2</sub>O<sub>3</sub>S: C, 31.83; H, 2.43; N, 6.75%. Found: C, 31.83; H, 2.37; N, 6.68%.

#### General procedure for the Ag(I)-catalysed conversion of 1 to 2 or 4:

Substrate **1** (1 equiv.) was dissolved in acetone (2.5 mL per mmol of substrate) at room temperature and [Ag(py)<sub>2</sub>]OTf (0.1 equiv.) was added. After the prescribed reaction time, the reaction mixture was filtered, and the filtrate concentrated in vacuo. The residue was purified by column chromatography (petroleum ether/ethyl acetate).

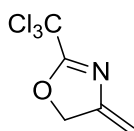

#### 4-Methylene-2-(trichloromethyl)-4,5-dihydrooxazole (2a):<sup>[1], [3]</sup>

Purified by column chromatography (petroleum ether/ethyl acetate, 8:1) on silica as a yellow oil. <sup>1</sup>H NMR (400 MHz, CDCl<sub>3</sub>): δ = 5.39 (td, *J* = 3.3, 1.6, 1H), 5.23 (t, *J* = 3.1, 2H), 4.87 (td, *J* = 3.3, 1.6 Hz, 1H). <sup>13</sup>C NMR (100 MHz, CDCl<sub>3</sub>): δ = 168.55, 153.26, 102.11, 74.42. HRMS (ESI) calcd for C<sub>5</sub>H<sub>4</sub>Cl<sub>3</sub>NO [M+H]<sup>+</sup>: 199.9437; found 199.9447.

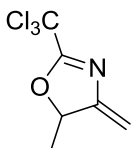

**5-Methyl-4-methylene-2-(trichloromethyl)-4,5-dihydrooxazole (2b):** <sup>[1]</sup>

Purified by column chromatography (petroleum ether/ethyl acetate, 8:1) as a yellow oil. <sup>1</sup>H NMR (400 MHz, CDCl<sub>3</sub>): δ = 5.46 (qt, *J* = 6.4, 3.0, 1H), 5.35 (dd, *J* = 3.4, 1.5, 1H), 4.77-4.76 (m, 1H), 1.57 (d, *J* = 6.5, 3H). <sup>13</sup>C NMR (100 MHz, CDCl<sub>3</sub>): δ = 166.94, 158.48, 101.81, 83.35, 21.35. HRMS (ESI) calcd for C<sub>6</sub>H<sub>6</sub>Cl<sub>3</sub>NO [M+H]<sup>+</sup>: 213.9593; found 213.9580.

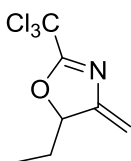

**5-Ethyl-4-methylene-2-(trichloromethyl)-4,5-dihydrooxazole (2c):**

Purified by column chromatography (petroleum ether/ethyl acetate, 5:1) as a yellow oil. <sup>1</sup>H NMR (400 MHz, CDCl<sub>3</sub>): δ = 5.42-5.39 (m, 2H), 4.76 (t, *J* = 2.0, 1H), 2.05 - 1.95 (m, 1H), 1.81 - 1.71 (m, 1H), 1.01 (t, *J* = 7.4, 3H). <sup>13</sup>C NMR (100 MHz, CDCl<sub>3</sub>): δ = 167.31, 156.68, 102.06, 87.76, 28.51, 7.61. MS [CI]: *m/z* (%) = 228 (100) [M+H]<sup>+</sup>.

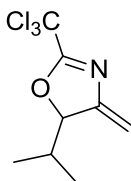

**5-(1-Methylethyl)-4-methylene-2-(trichloromethyl)-4,5-dihydrooxazole (2d):** <sup>[3]</sup>

Purified by column chromatography (petroleum ether/ethyl acetate, 10:1) to afford **2d** as a yellow oil. <sup>1</sup>H NMR (400 MHz, CDCl<sub>3</sub>): δ = 5.42 (dd, *J* = 1.4, 3.0, 1H), 5.26 (dd, *J* = 3.0, 5.8, 1H), 4.78 - 4.77 (m, 1H), 2.00 (m, 1H), 1.11 (d, *J* = 6.9, 3H), 0.95 (d, *J* = 6.9, 3H). <sup>13</sup>C NMR (100 MHz, CDCl<sub>3</sub>): δ = 167.43, 155.93, 102.61, 91.38, 33.84, 18.07, 14.77. HRMS (ESI) calcd for C<sub>8</sub>H<sub>10</sub>Cl<sub>3</sub>NO [M+H]<sup>+</sup>: 241.9906; found 241.9911.

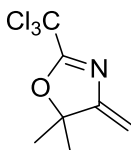

**5,5-Dimethyl-4-methylene-2-(trichloromethyl)-4,5-dihydrooxazole (2e):**

Purified by column chromatography (petroleum ether/ethyl acetate, 8:1) to afford **2e** as a light yellow oil. <sup>1</sup>H NMR (400 MHz, CDCl<sub>3</sub>): δ = 5.31 (d, *J* = 1.5, 1H), 4.71 (d, *J* = 1.5, 1H), 1.59 (s, 6H). <sup>13</sup>C NMR (100 MHz, CDCl<sub>3</sub>): δ = 165.27, 162.03, 100.86, 91.79, 27.74. HRMS (ESI) calcd for C<sub>7</sub>H<sub>8</sub>Cl<sub>3</sub>NO [M+H]<sup>+</sup>: 229.9720; found 229.9730.

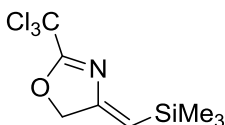

**(Z)-4-Trimethylsilylmethylene-2-(trichloromethyl)-4,5-dihydrooxazole (2g):**

Purified by column chromatography (petroleum ether/ethyl acetate, 10:1) to afford **2g** as a light yellow oil.  $^1\text{H}$  NMR (400 MHz,  $\text{CDCl}_3$ ):  $\delta$  = 5.28 (t,  $J$  = 2.6, 1H), 5.14 (d,  $J$  = 2.6, 2H), 0.18 (s, 9H).  $^{13}\text{C}$  NMR (100 MHz,  $\text{CDCl}_3$ ):  $\delta$  = 168.45, 159.23, 116.24, 75.65, -0.23. HRMS (ESI) calcd for  $\text{C}_8\text{H}_{12}\text{Cl}_3\text{NOSi}$   $[\text{M}]^+$ : 272.9724; found 272.9844.

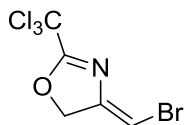

**(Z)-4-Bromomethylene-2-(trichloromethyl)-4,5-dihydrooxazole (2h):**

Purified by column chromatography (petroleum ether/ethyl acetate, 8:1) as a white crystalline solid.  $^1\text{H}$  NMR (400 MHz,  $\text{CDCl}_3$ ):  $\delta$  = 5.92 (t,  $J$  = 2.8, 1H), 5.24 (d,  $J$  = 2.8, 2H).  $^{13}\text{C}$  NMR (100 MHz,  $\text{CDCl}_3$ ):  $\delta$  = 169.74, 149.81, 92.39, 74.79. HRMS (ESI) calcd for  $\text{C}_5\text{H}_3\text{BrCl}_3\text{NO}$   $[\text{M}+\text{H}]^+$ : 279.8521; found 279.8533.

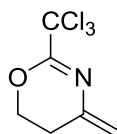

**2-(Trichloromethyl)-4-methylene-5,6-dihydro-4H-1,3-oxazine (4a):** <sup>[3]</sup>

Purified by column chromatography (petroleum ether/ethyl acetate, 5:1) as a light yellow oil.  $^1\text{H}$  NMR (400 MHz,  $\text{CDCl}_3$ ):  $\delta$  = 5.29 (s, 1H), 4.86 (s, 1H), 4.47 - 4.44 (m, 2H), 2.64 - 2.61 (m, 2H).  $^{13}\text{C}$  NMR (100 MHz,  $\text{CDCl}_3$ ):  $\delta$  = 153.74, 140.99, 111.47, 67.40, 26.21. HRMS (ESI) calcd for  $\text{C}_6\text{H}_6\text{Cl}_3\text{NO}$   $[\text{M}+\text{H}]^+$ : 215.9564; found 215.9571.

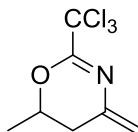

**2-(Trichloromethyl)-4-methylene-6-methyl-5,6-dihydro-1,3-oxazine (4b):**

Purified by column chromatography (petroleum ether/ethyl acetate, 5:1) as a yellow oil.  $^1\text{H}$  NMR (400 MHz,  $\text{CDCl}_3$ ):  $\delta$  = 5.31 (s, 1H), 4.85 (s, 1H), 4.55 (dq,  $J$  = 8.5, 6.4, 3.8, 1H), 2.65 (dd,  $J$  = 15.1, 3.8, 1H), 2.32 (ddt,  $J$  = 15.1, 8.5, 1.1, 1H), 1.42 (d,  $J$  = 6.4, 3H).  $^{13}\text{C}$  NMR (100 MHz,  $\text{CDCl}_3$ ):  $\delta$  = 153.91, 141.19, 111.76, 74.41, 32.98, 19.96. HRMS (ESI) calcd for  $\text{C}_7\text{H}_8\text{Cl}_3\text{NO}$   $[\text{M}+\text{H}]^+$ : 227.9750; found 227.9752.

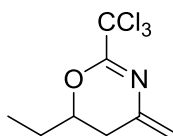

**2-(Trichloromethyl)-4-methylene-6-ethyl-5,6-dihydro-1,3-oxazine (4c):**

Purified by column chromatography (petroleum ether/ethyl acetate, 5:1) as a yellow oil.  $^1\text{H}$  NMR (400 MHz,  $\text{CDCl}_3$ ):  $\delta$  = 5.28 (s, 1H), 4.84 (s, 1H), 4.31 (dddd,  $J$  = 8.5, 7.6, 5.5, 3.9, 1H), 2.62 (dd,  $J$  = 15.1, 3.9, 1H), 2.34 (ddt,  $J$  = 15.1, 8.5, 1.5, 1H), 1.79-1.67 (m, 2H), 1.04 (t,  $J$  = 7.5, 3H).  $^{13}\text{C}$  NMR (100 MHz,  $\text{CDCl}_3$ ):  $\delta$  = 154.03, 141.38, 111.56, 79.25, 30.99, 27.23, 9.07. HRMS (ESI) calcd for  $\text{C}_8\text{H}_{10}\text{Cl}_3\text{NO}$   $[\text{M}+\text{H}]^+$ : 243.9877; found 243.9888.

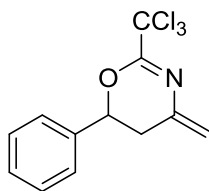

**2-(Trichloromethyl)-4-methylene-6-phenyl-5,6-dihydro-1,3-oxazine (4d):** <sup>[3]</sup>

Purified by column chromatography (petroleum ether/ethyl acetate, 5:1) as a light yellow solid. <sup>1</sup>H NMR (400 MHz, CDCl<sub>3</sub>): δ = 7.45 - 7.37 (m, 5H), 5.38 (d, *J* = 1.7, 1H), 5.35 (dd, *J* = 10.6, 3.5, 1H), 4.92 (d, *J* = 1.7, 1H), 2.87 (dd, *J* = 15.2, 3.5, 1H), 2.62 (ddt, *J* = 15.2, 10.6, 1.7, 1H). <sup>13</sup>C NMR (100 MHz, CDCl<sub>3</sub>): δ = 154.20, 141.41, 138.23, 128.88, 125.74, 112.04, 92.01, 79.22, 34.08. HRMS (ESI) calcd for C<sub>12</sub>H<sub>10</sub>Cl<sub>3</sub>NO [M+H]<sup>+</sup>: 289.9906; found 289.9894.

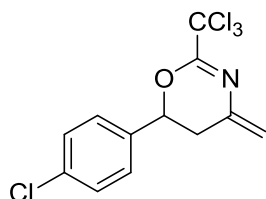

**2-(Trichloromethyl)-4-methylene-6-(4-chlorophenyl)-5,6-dihydro-1,3-oxazine (4e):** <sup>[3]</sup>

Purified by column chromatography (petroleum ether/ethyl acetate, 8:1) as an orange oil. <sup>1</sup>H NMR (400 MHz, CDCl<sub>3</sub>): δ = 7.41-7.38 (m, 2H), 7.33 - 7.30 (m, 2H), 5.39 (d, *J* = 1.6, 1H), 5.33 (dd, *J* = 10.4, 3.6, 1H), 4.93 (d, *J* = 1.6, 1H), 2.86 (dd, *J* = 15.2, 3.6 Hz, 1H), 2.59 (ddt, *J* = 15.2, 10.4, 1.6, 1H). <sup>13</sup>C NMR (100 MHz, CDCl<sub>3</sub>): δ = 153.88, 140.94, 136.69, 134.77, 129.11, 127.16, 112.44, 91.87, 78.43, 33.85. HRMS (ESI) calcd for C<sub>12</sub>H<sub>9</sub>Cl<sub>4</sub>NO [M+H]<sup>+</sup>: 325.9487; found 325.9491.

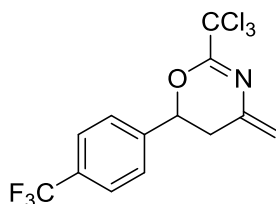

**2-(Trichloromethyl)-4-methylene-6-(4-trifluoromethylphenyl)-5,6-dihydro-1,3-oxazine (4f):**

Purified by column chromatography (petroleum ether/ethyl acetate, 8:1) as a yellow oil. <sup>1</sup>H NMR (400 MHz, CDCl<sub>3</sub>): δ = 7.69 (d, *J* = 8.2, 2H), 7.51 (d, *J* = 8.2, 2H), 5.44 - 5.40 (m, 2H), 4.95 (d, *J* = 1.7, 1H), 2.91 (dd, *J* = 15.2, 3.7 Hz, 1H), 2.60 (ddt, *J* = 15.2, 10.6, 1.7 Hz, 1H). <sup>13</sup>C NMR (100 MHz, CDCl<sub>3</sub>): δ = 153.66, 142.12, 140.62, 131.04 (q, *J* = 33.0 Hz), 126.01, 125.94, 125.91, 125.20, 122.50, 112.72, 91.79, 78.28, 33.87. HRMS (ESI) calcd for C<sub>13</sub>H<sub>9</sub>Cl<sub>3</sub>F<sub>3</sub>NO [M+H]<sup>+</sup>: 357.9780; found 357.9776.

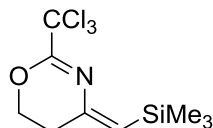

**2-(Trichloromethyl)-4-(trimethylsilyl)methylene-5,6-dihydro-1,3-oxazine (4h):**

Purified by column chromatography (petroleum ether/ethyl acetate, 8:1) as a light yellow oil. <sup>1</sup>H NMR (400 MHz, CDCl<sub>3</sub>): δ = 5.30 (t, *J* = 1.1 Hz, 1H), 4.44 (t, *J* = 6.1 Hz, 2H), 2.61 (td, *J* = 6.1, 1.1 Hz, 2H), 0.17 (s, 9H). <sup>13</sup>C NMR (100 MHz, CDCl<sub>3</sub>): δ = 152.32, 146.94, 127.13, 92.39, 67.64, 28.84, -0.14. HRMS (ESI) calcd for C<sub>9</sub>H<sub>14</sub>Cl<sub>3</sub>NOSi [M+H]<sup>+</sup>: 285.9988; found 285.9994.

## References

- [1] A. S. K. Hashmi, M. Rudolph, S. Schymura, J. Visus and W. Frey *Eur. J. Org. Chem.*, 2006, 4905–4909.
- [2] R. J. Detz, M. M. E. Delville, H. Hiemstra and J. H. van Maarseveen, *Angew. Chem., Int. Ed. Engl.*, 2008, **47**, 3777–3780.
- [3] J.-E. Kang, H.-B. Kim, J.-W. Lee and S. Shin, *Org. Lett.*, 2006, **8**, 3537–3540.
- [4] A. Viola and J. H. MacMillan, *J. Am. Chem. Soc.*, 1968, **90**, 6141–6145.
- [5] N. F. O'Rourke, K. A. Davies and J. E. Wulff, *J. Org. Chem.*, 2012, **77**, 8634–8647.
- [6] R. M. Hensarling, V. A. Doughty, J. W. Chan and D. L. Patton, *J. Am. Chem. Soc.*, 2009, **131**, 14673–14675.
- [7] C. Y. Chen, J. Y. Zeng and H. M. Lee, *Inorg. Chim. Acta*, 2007, **360**, 21–30.
- [8] C. Di Nicola, Effendy, F. Marchetti, C. Nervi, C. Pettinari, W. T. Robinson, A. N. Sobolev and A. H. White, *Dalton Trans.*, 2010, **39**, 908–922.

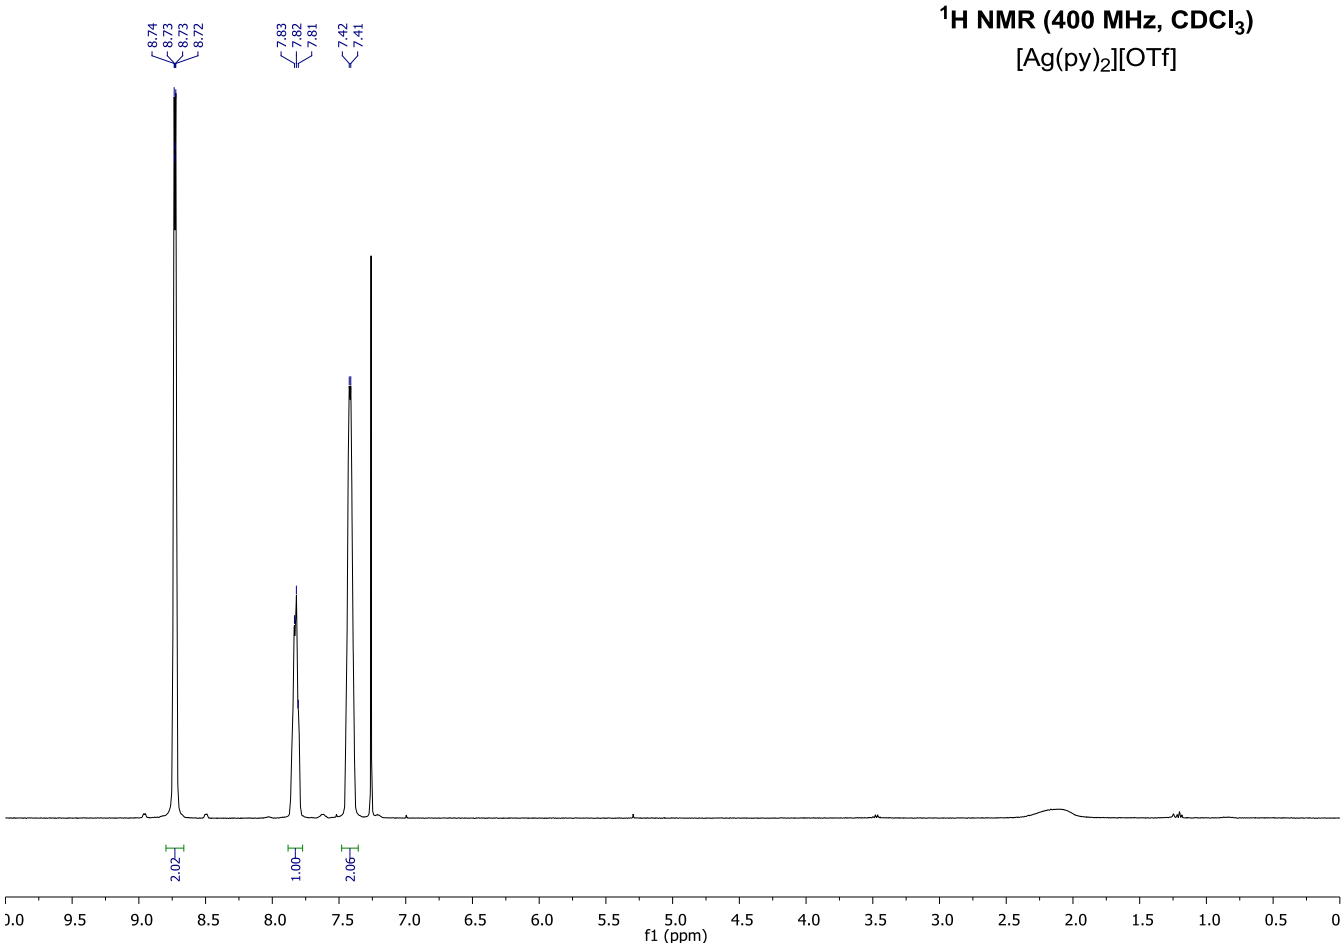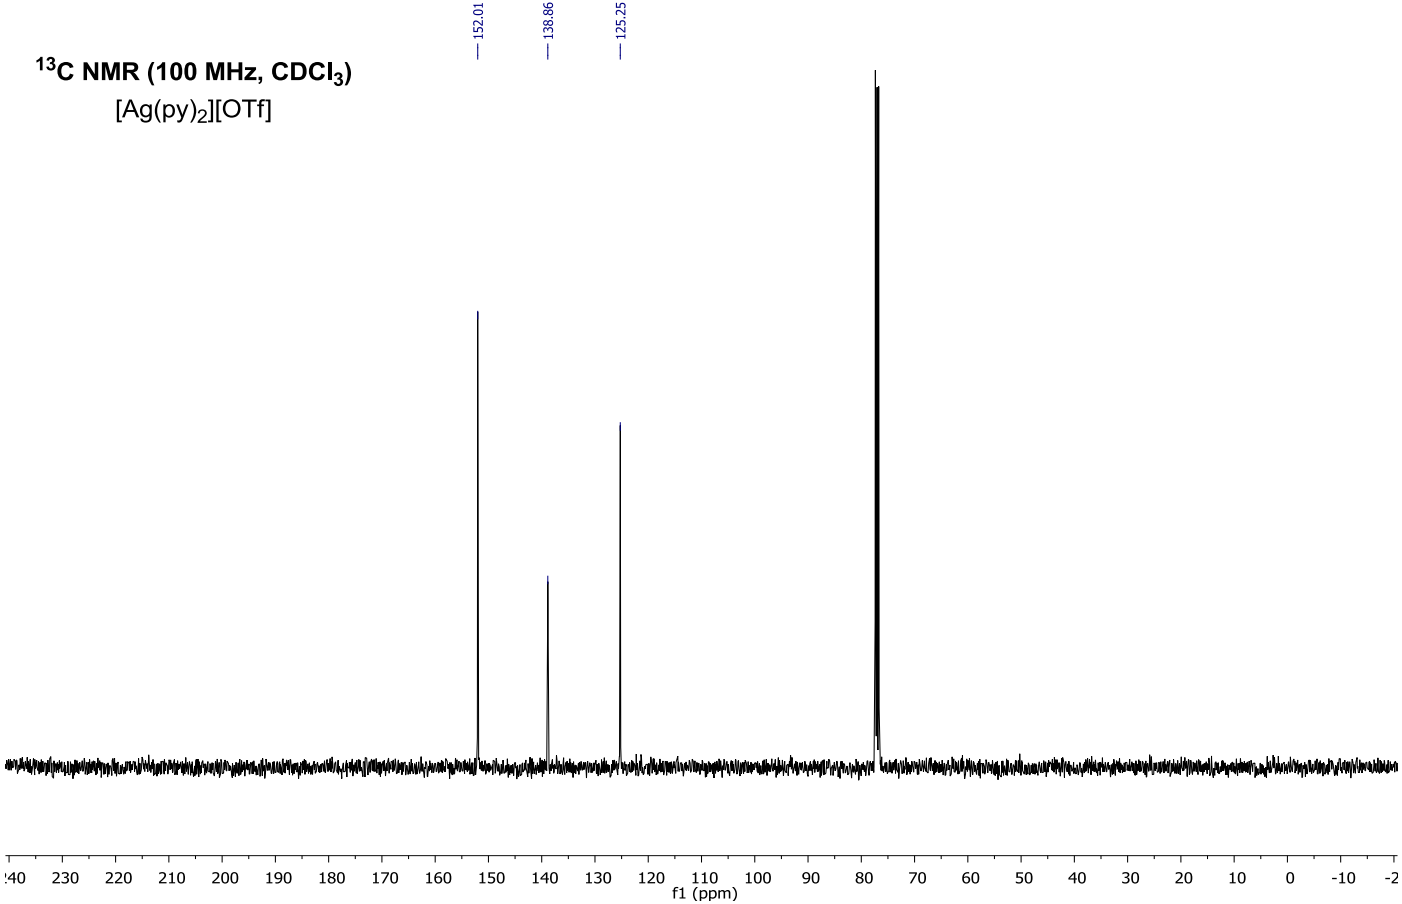

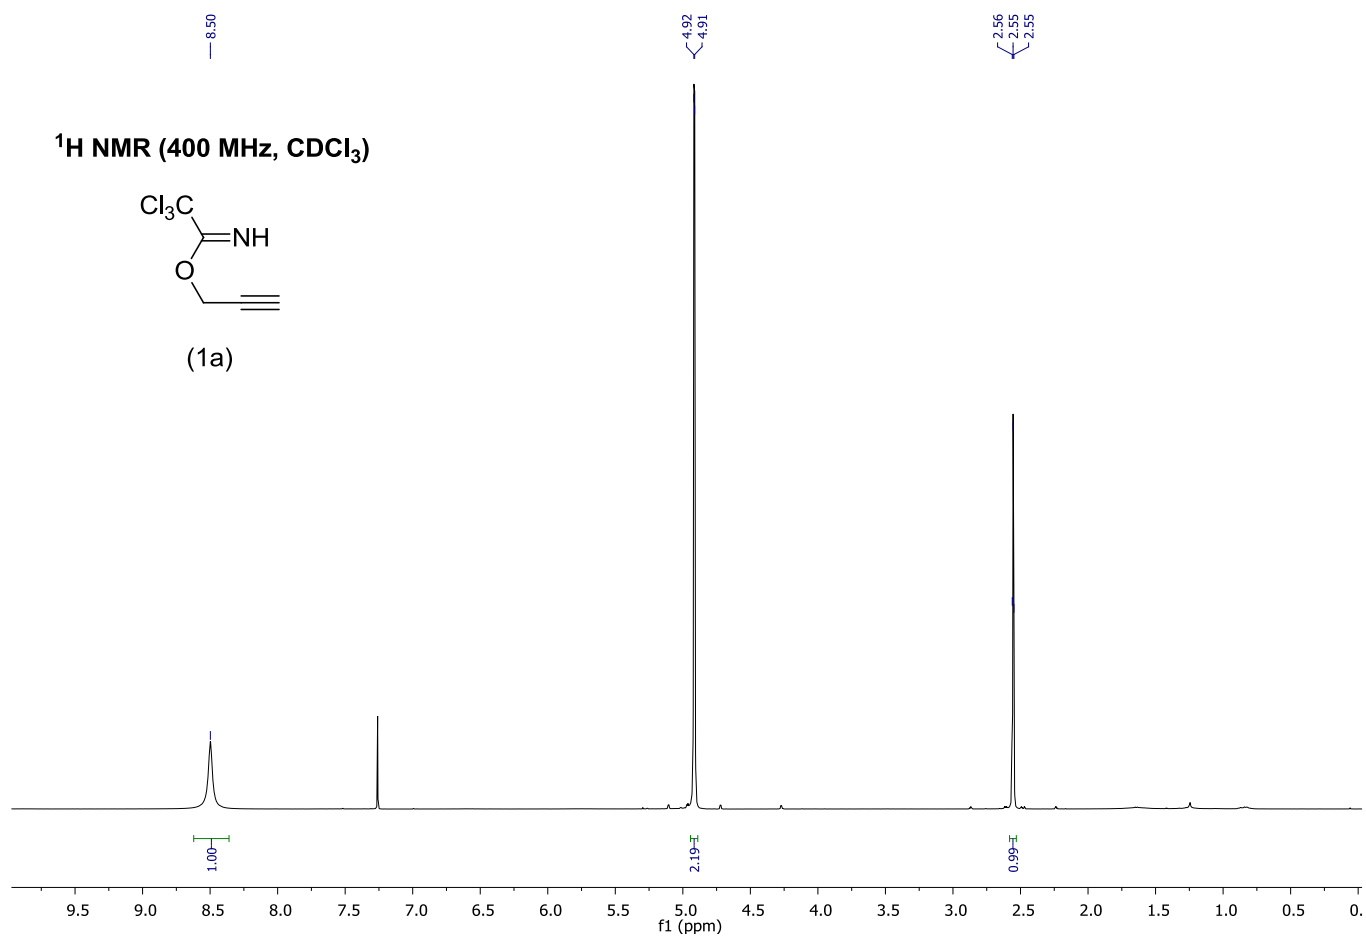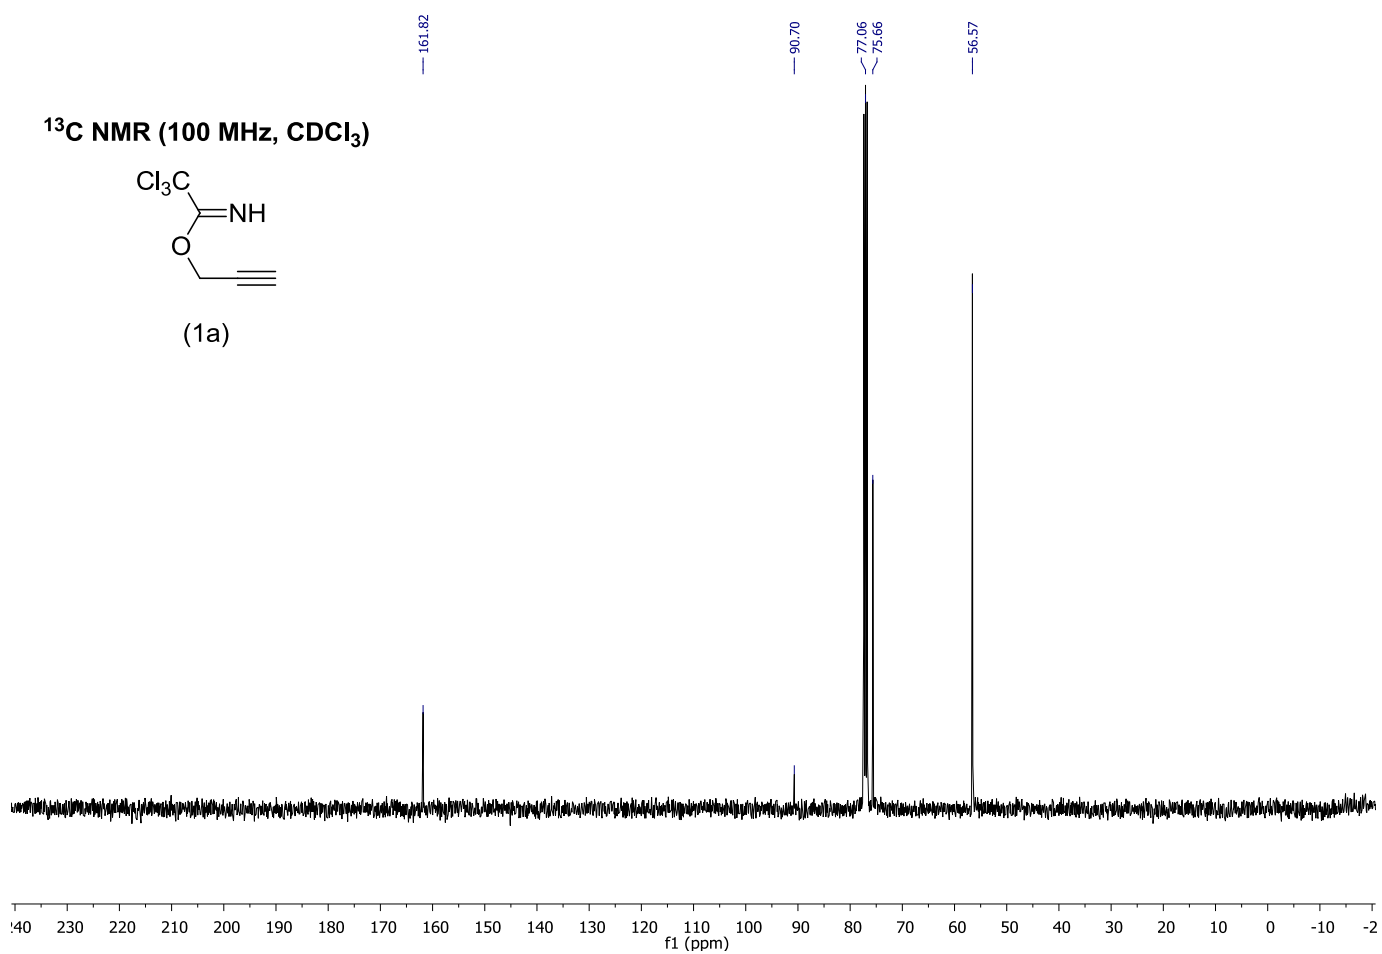



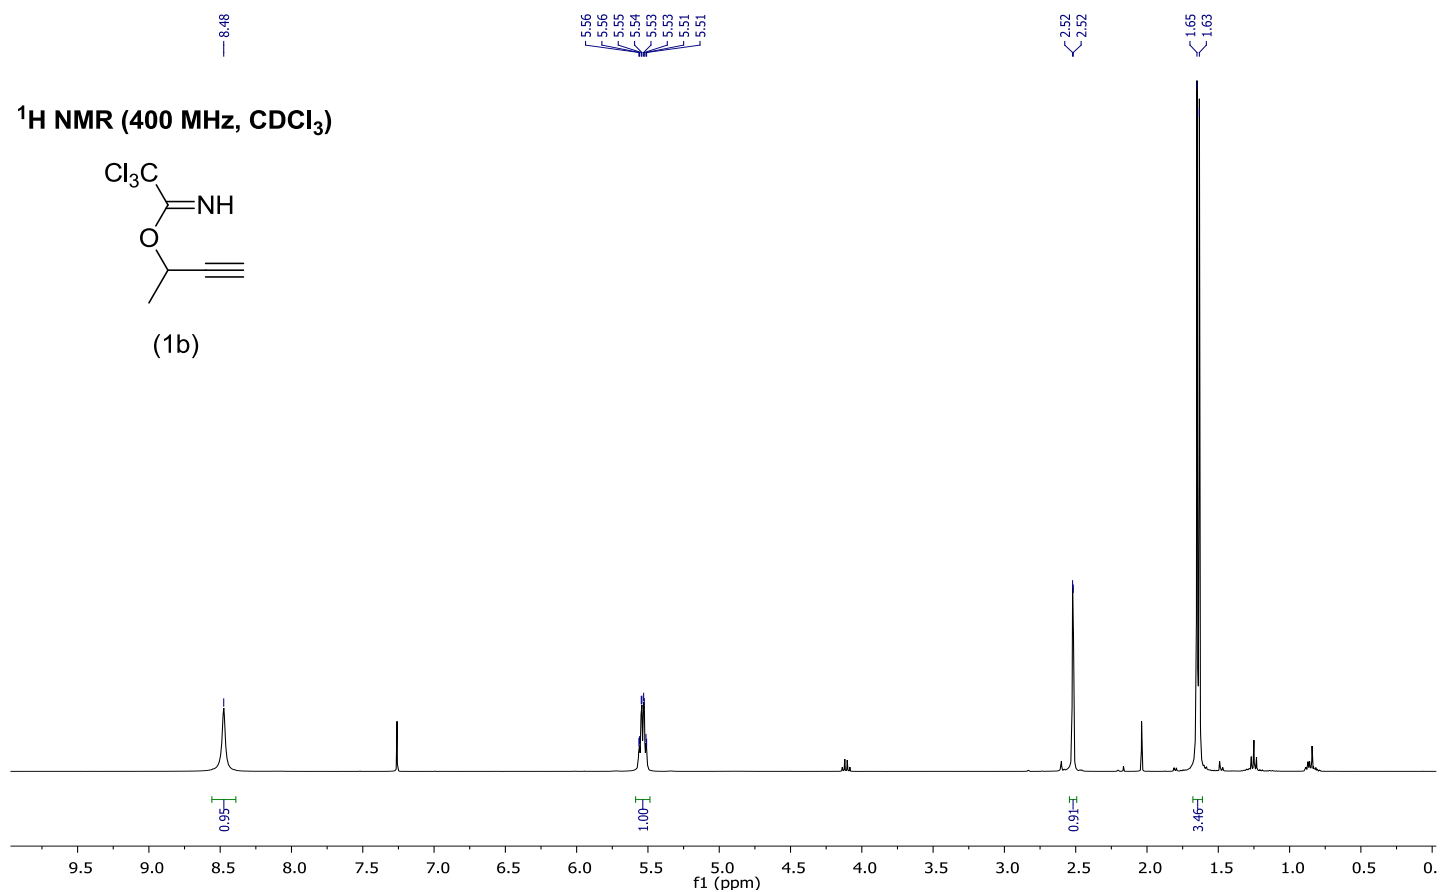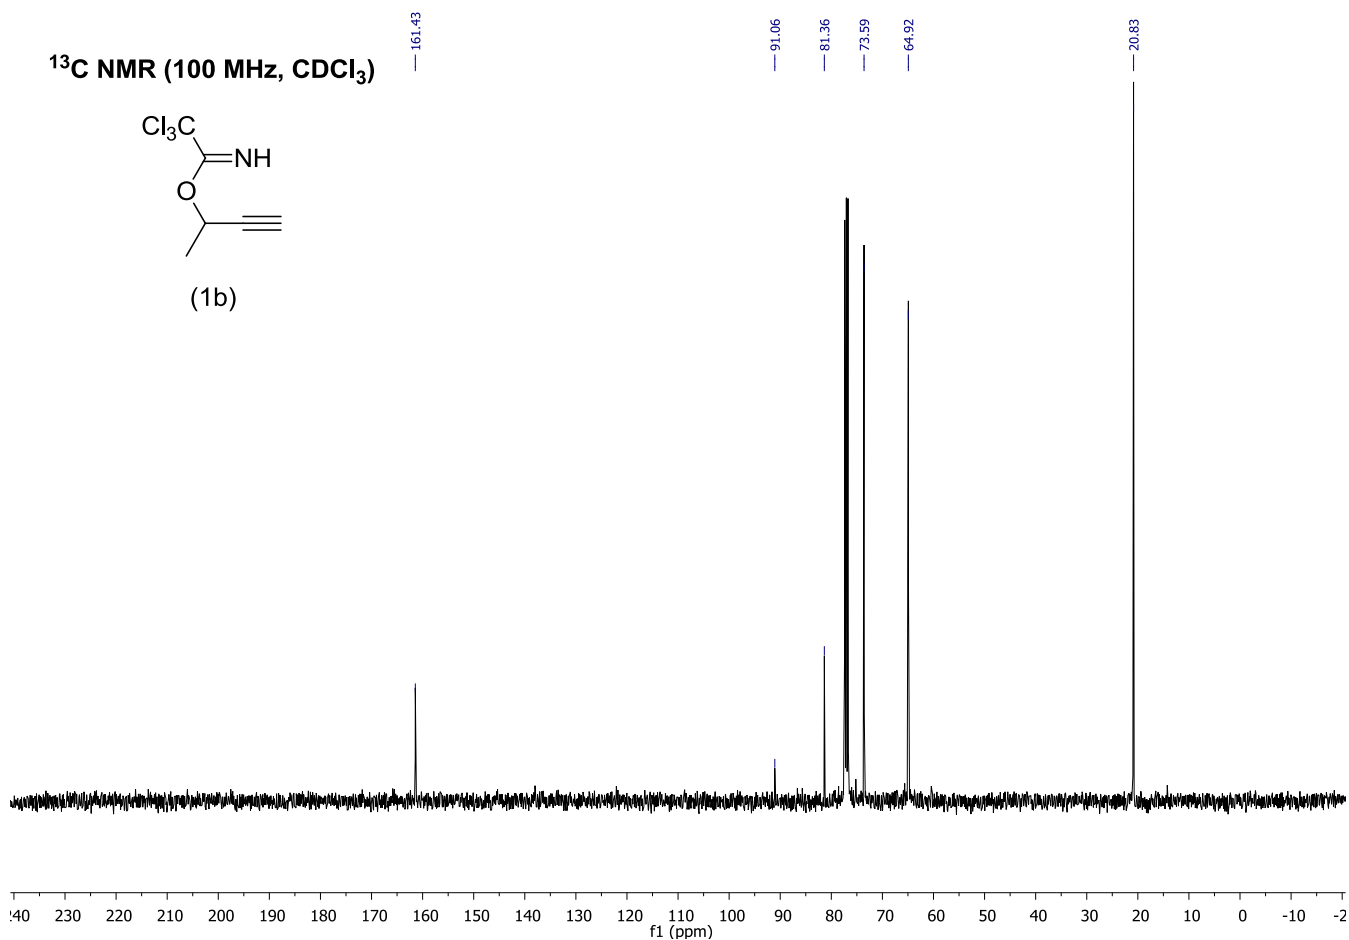

**<sup>1</sup>H NMR (400 MHz, CDCl<sub>3</sub>)**

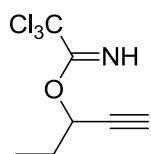

(1c)

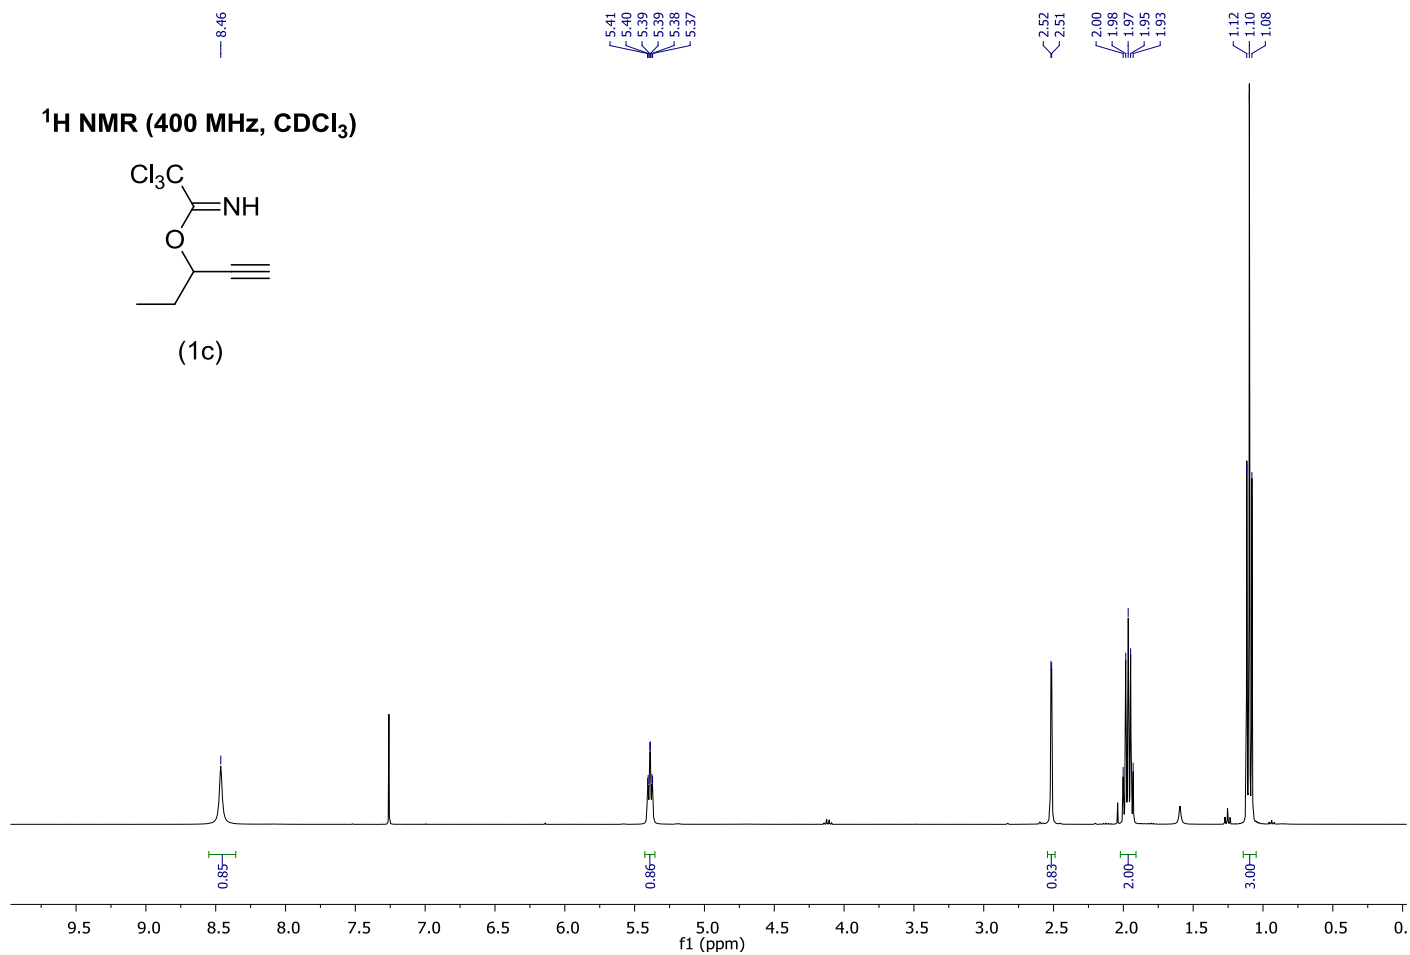

**<sup>13</sup>C NMR (100 MHz, CDCl<sub>3</sub>)**

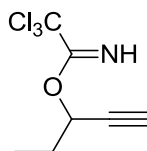

(1c)

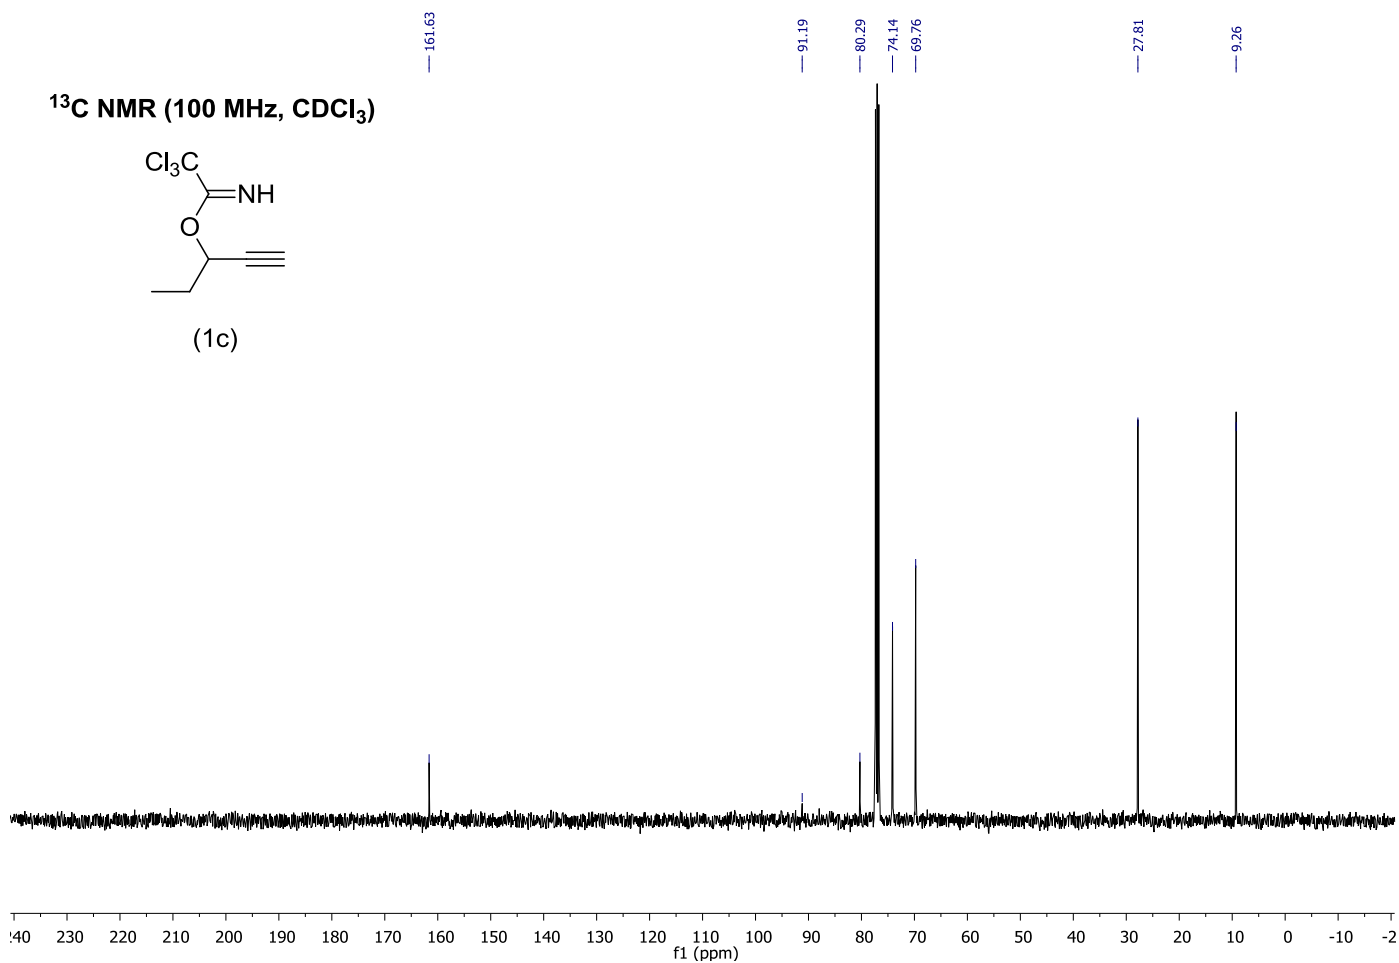

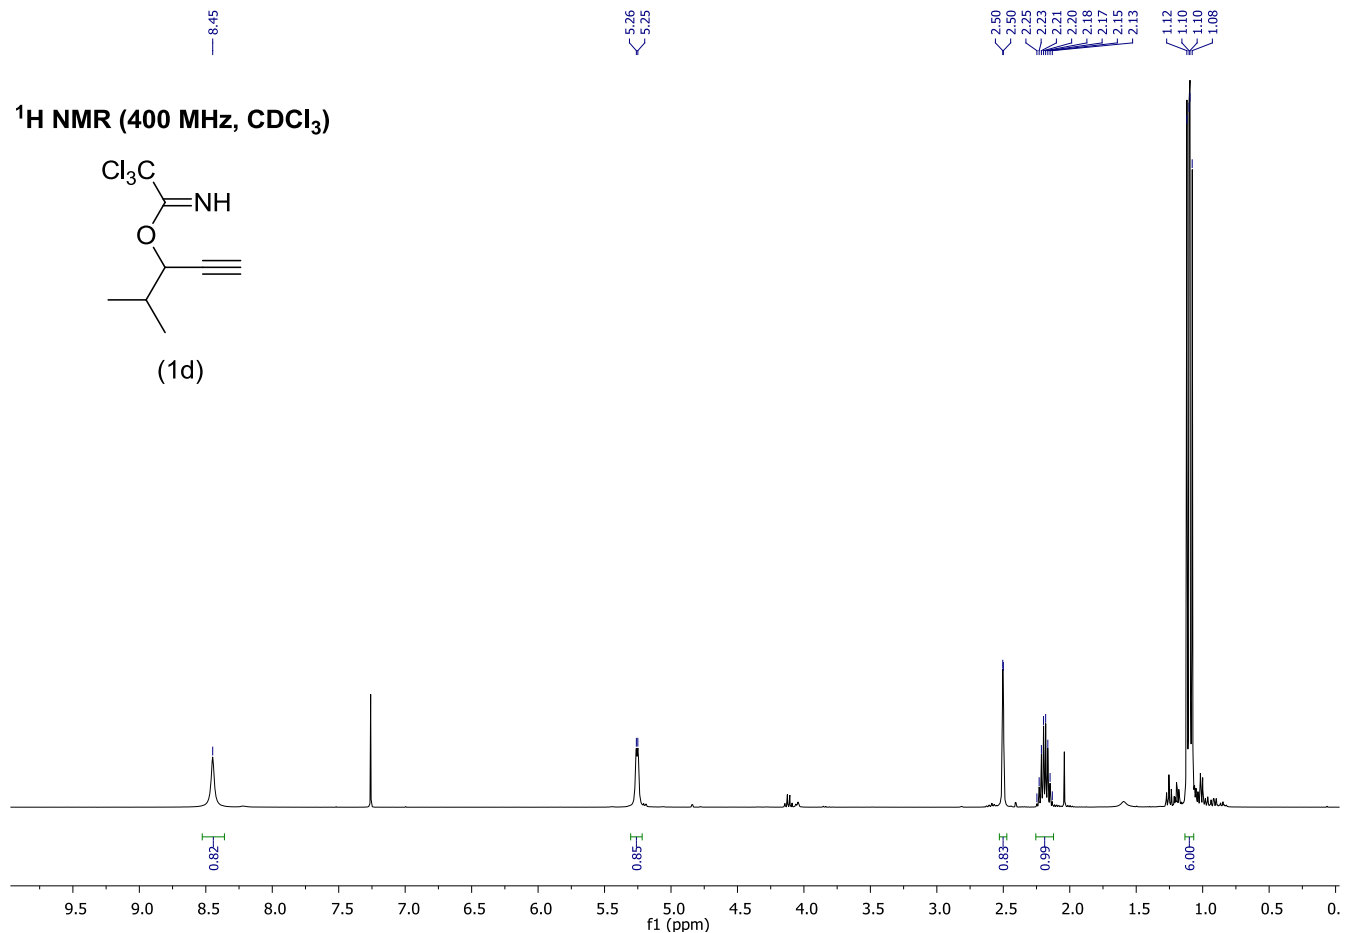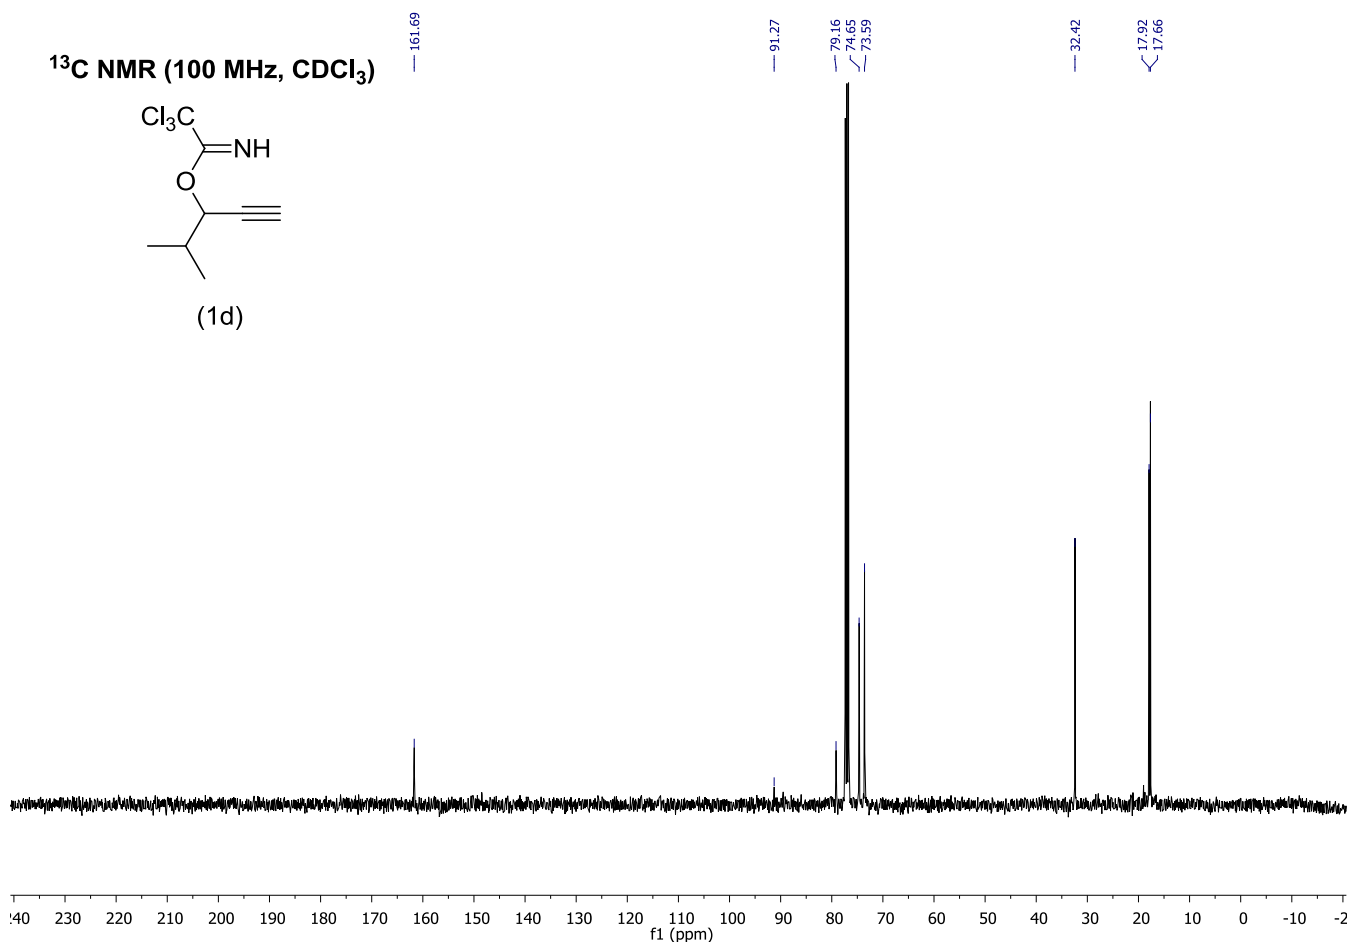

**<sup>1</sup>H NMR (400 MHz, CDCl<sub>3</sub>)**

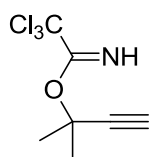

(1e)

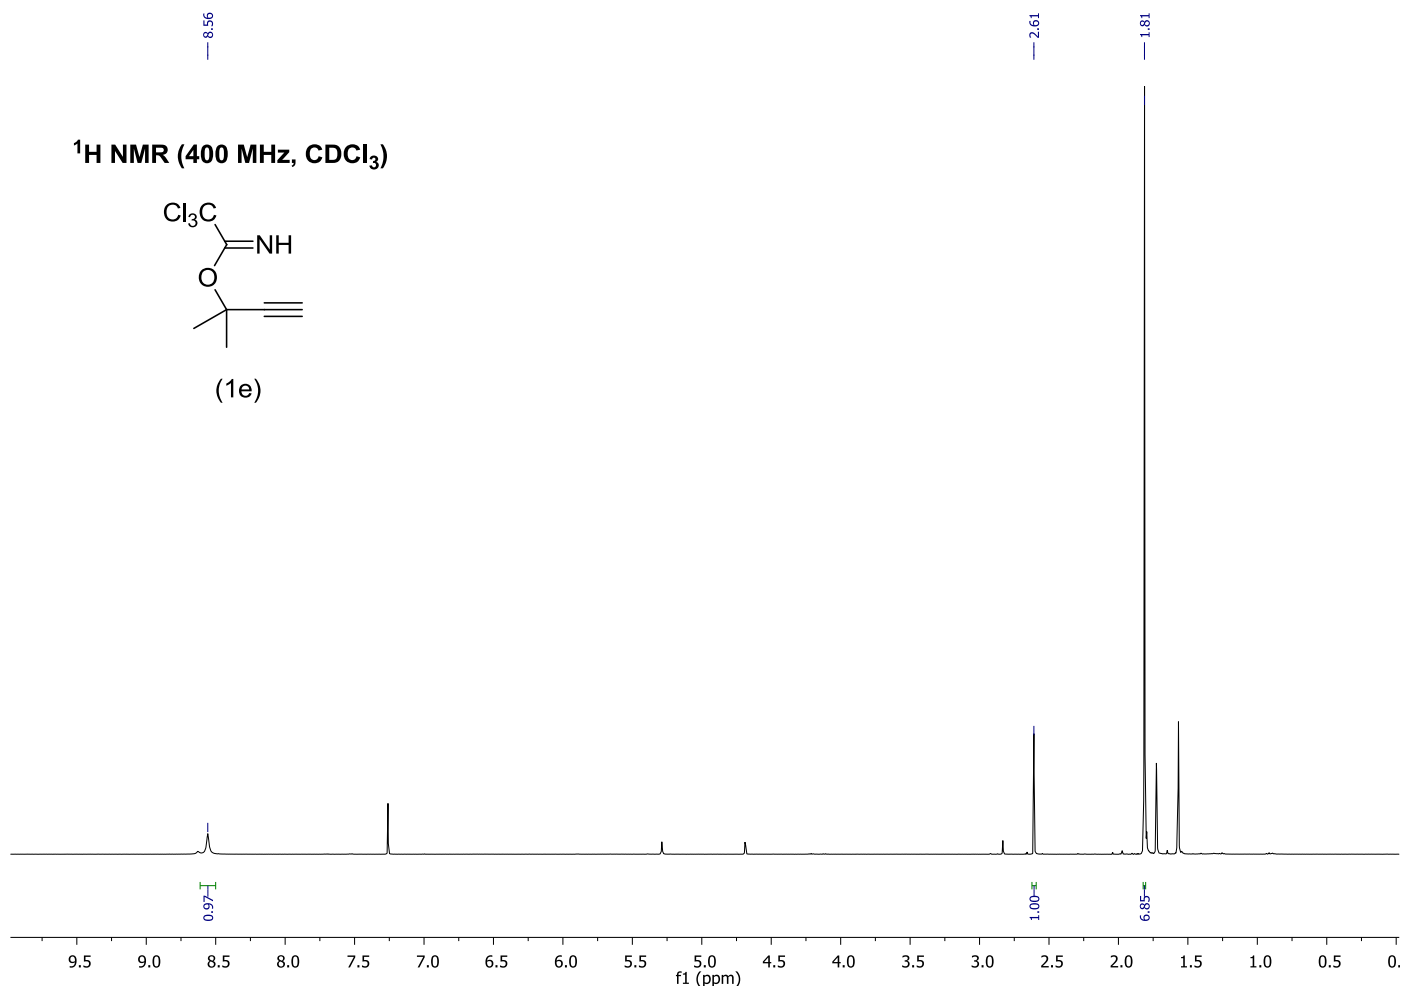

**<sup>13</sup>C NMR (100 MHz, CDCl<sub>3</sub>)**

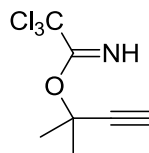

(1e)

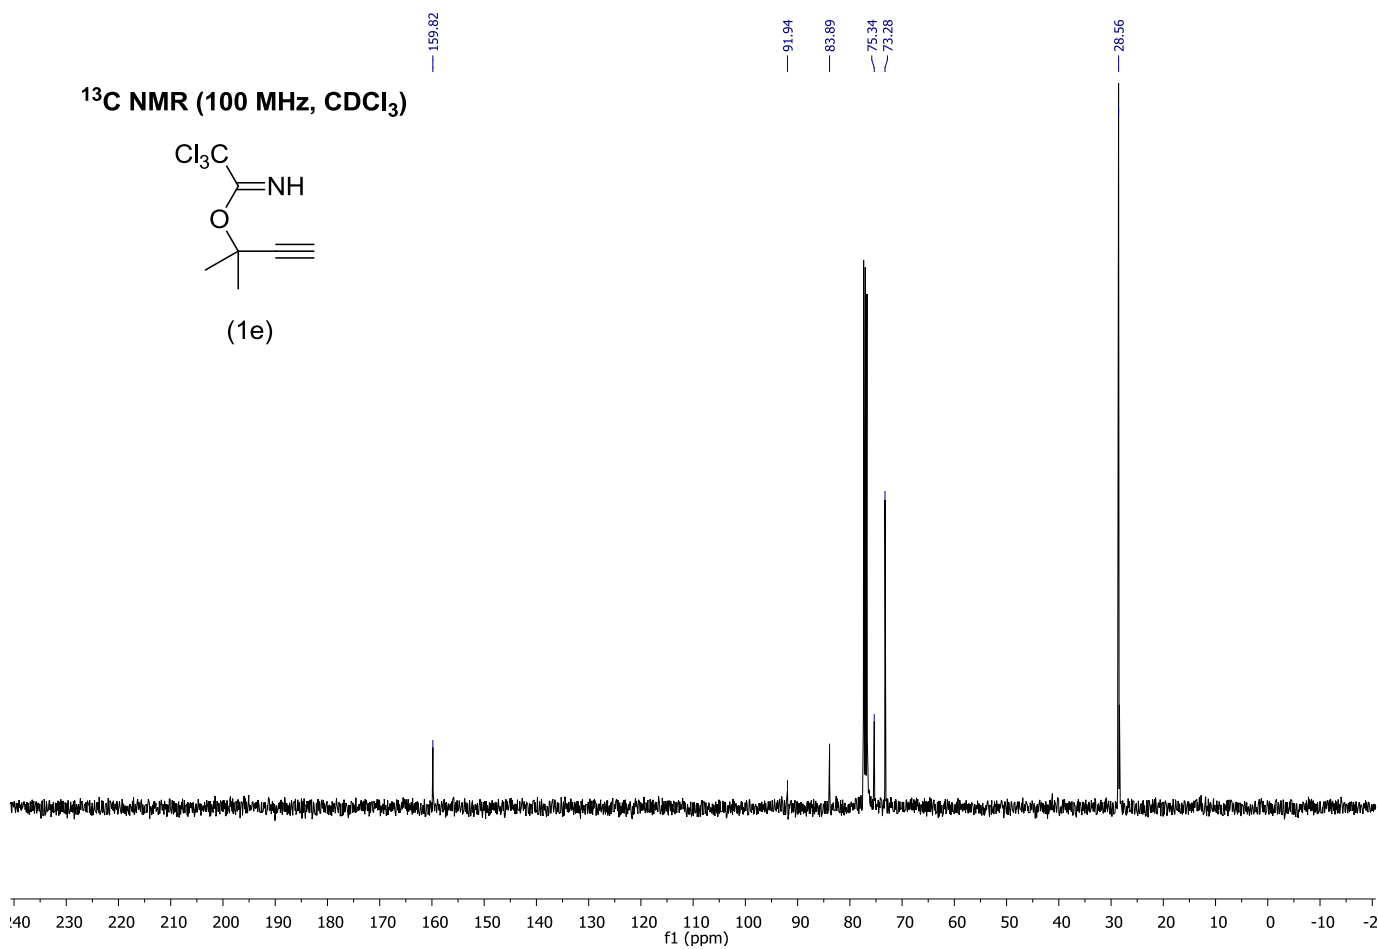

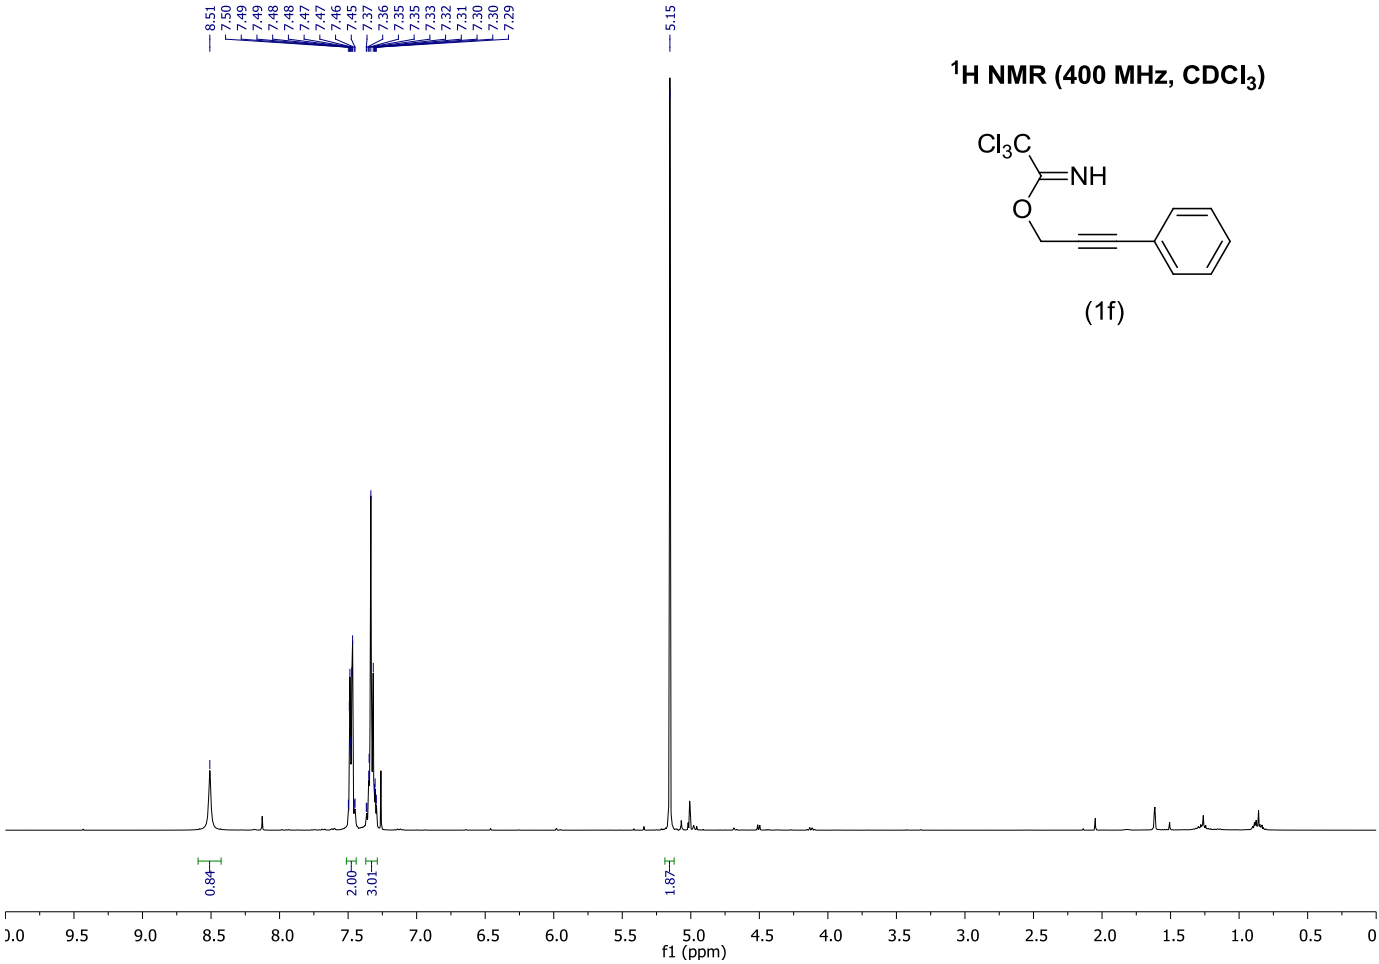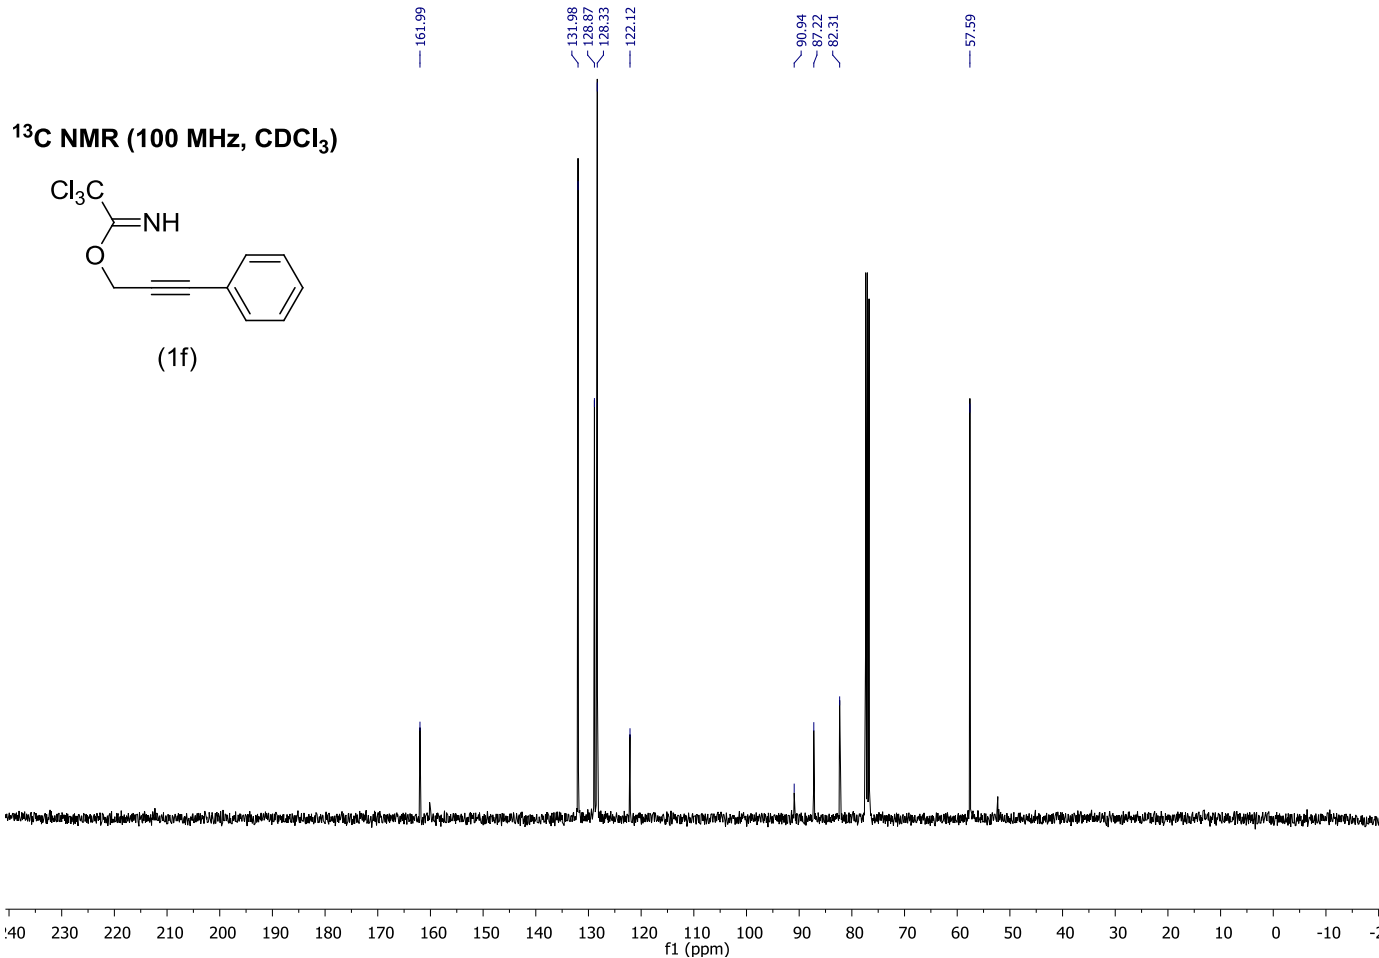

**<sup>1</sup>H NMR (400 MHz, CDCl<sub>3</sub>)**

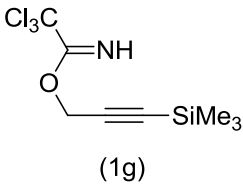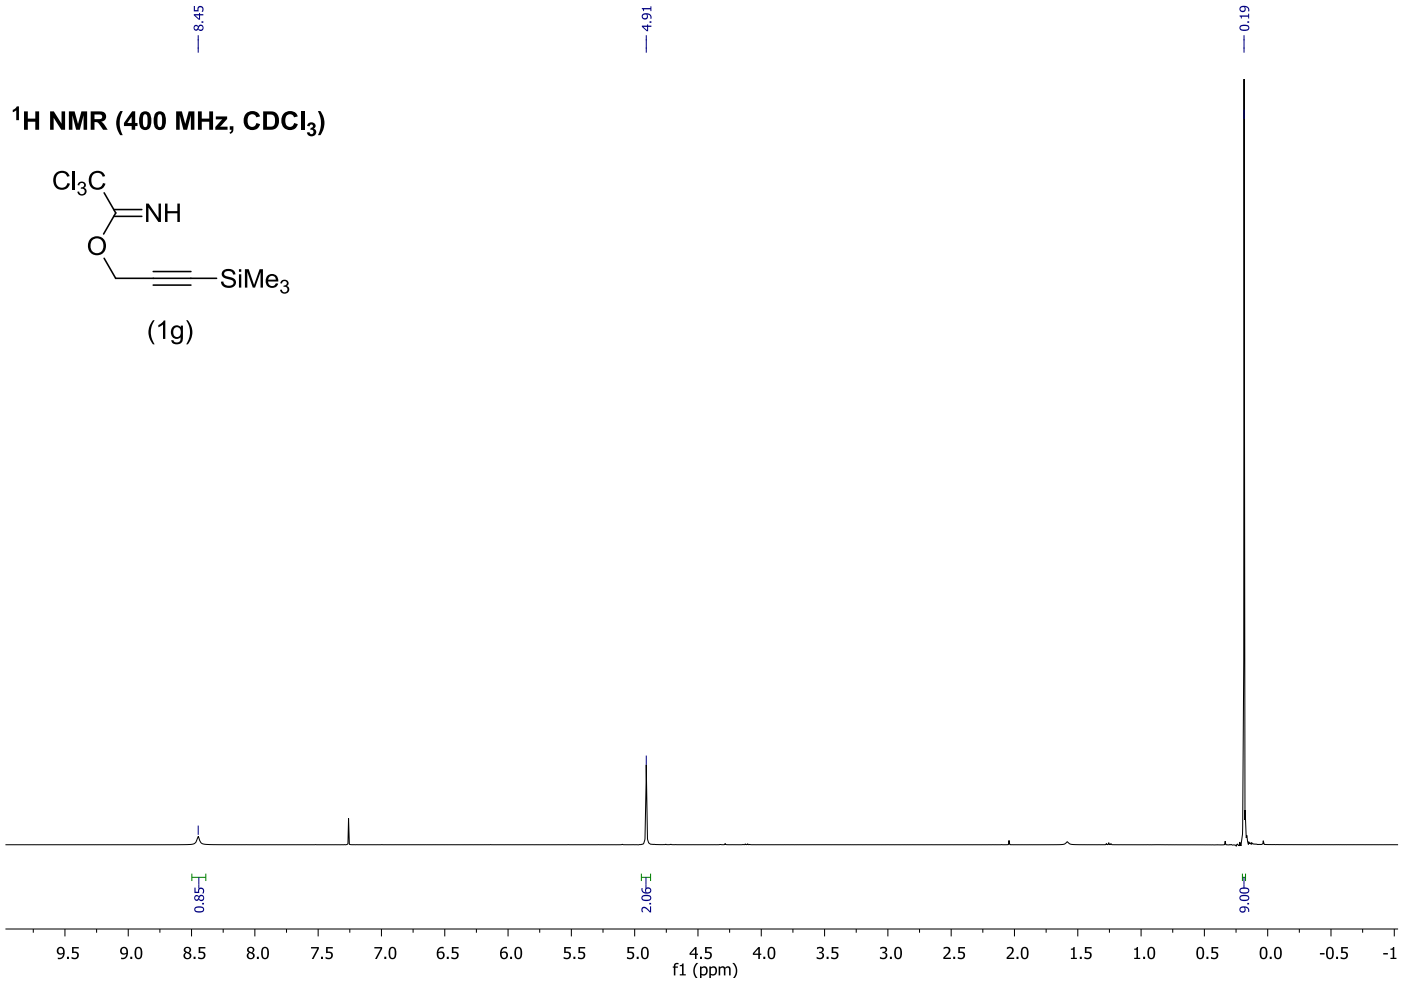

**<sup>13</sup>C NMR (100 MHz, CDCl<sub>3</sub>)**

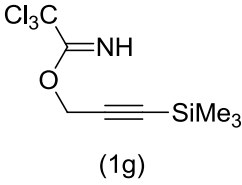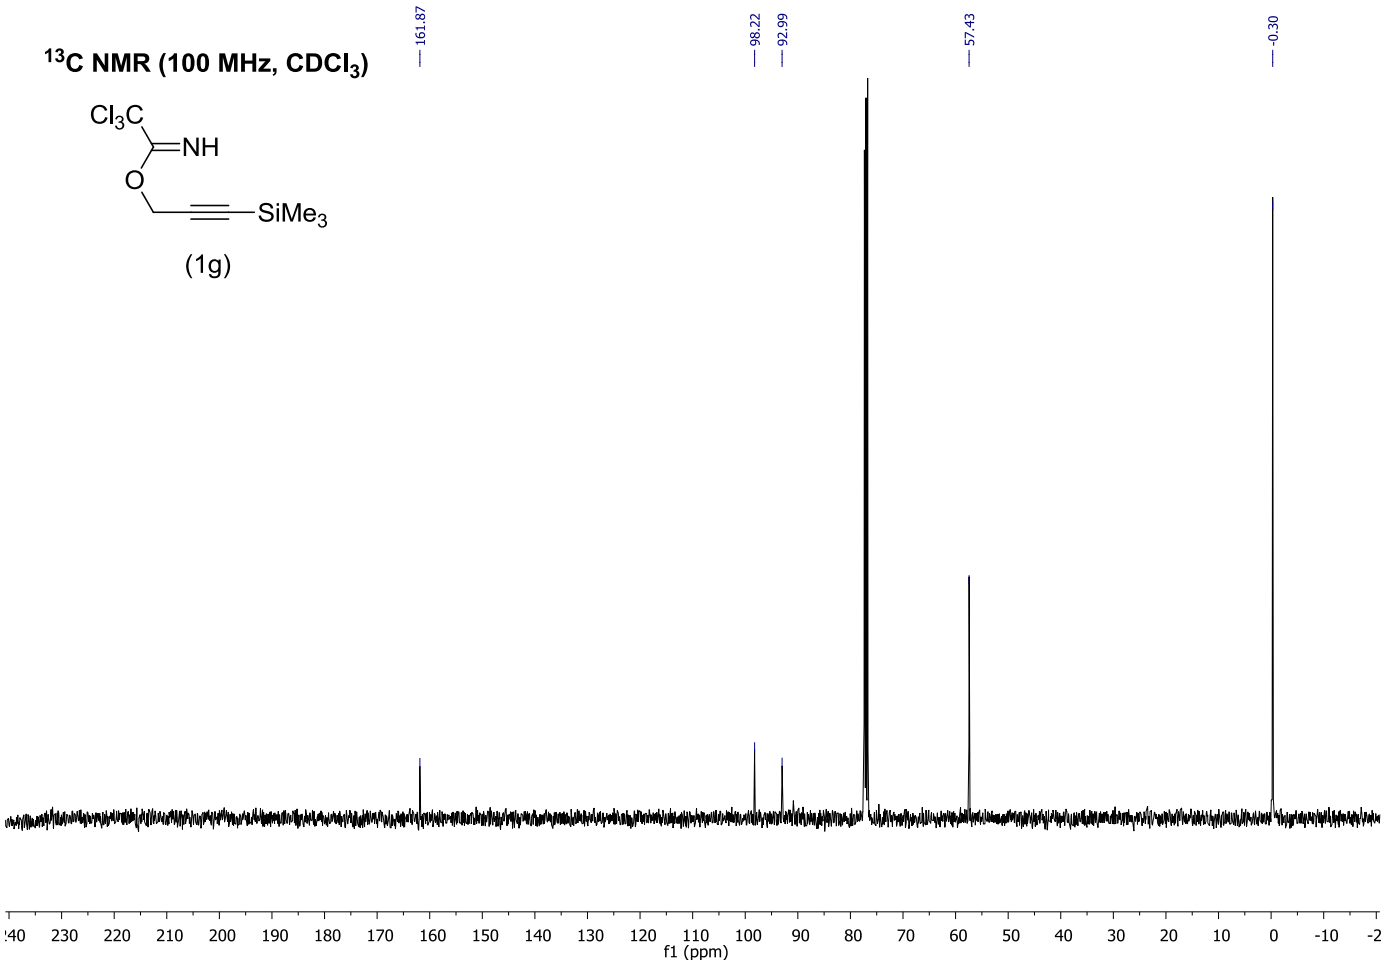

**<sup>1</sup>H NMR (400 MHz, CDCl<sub>3</sub>)**

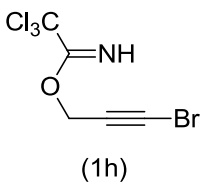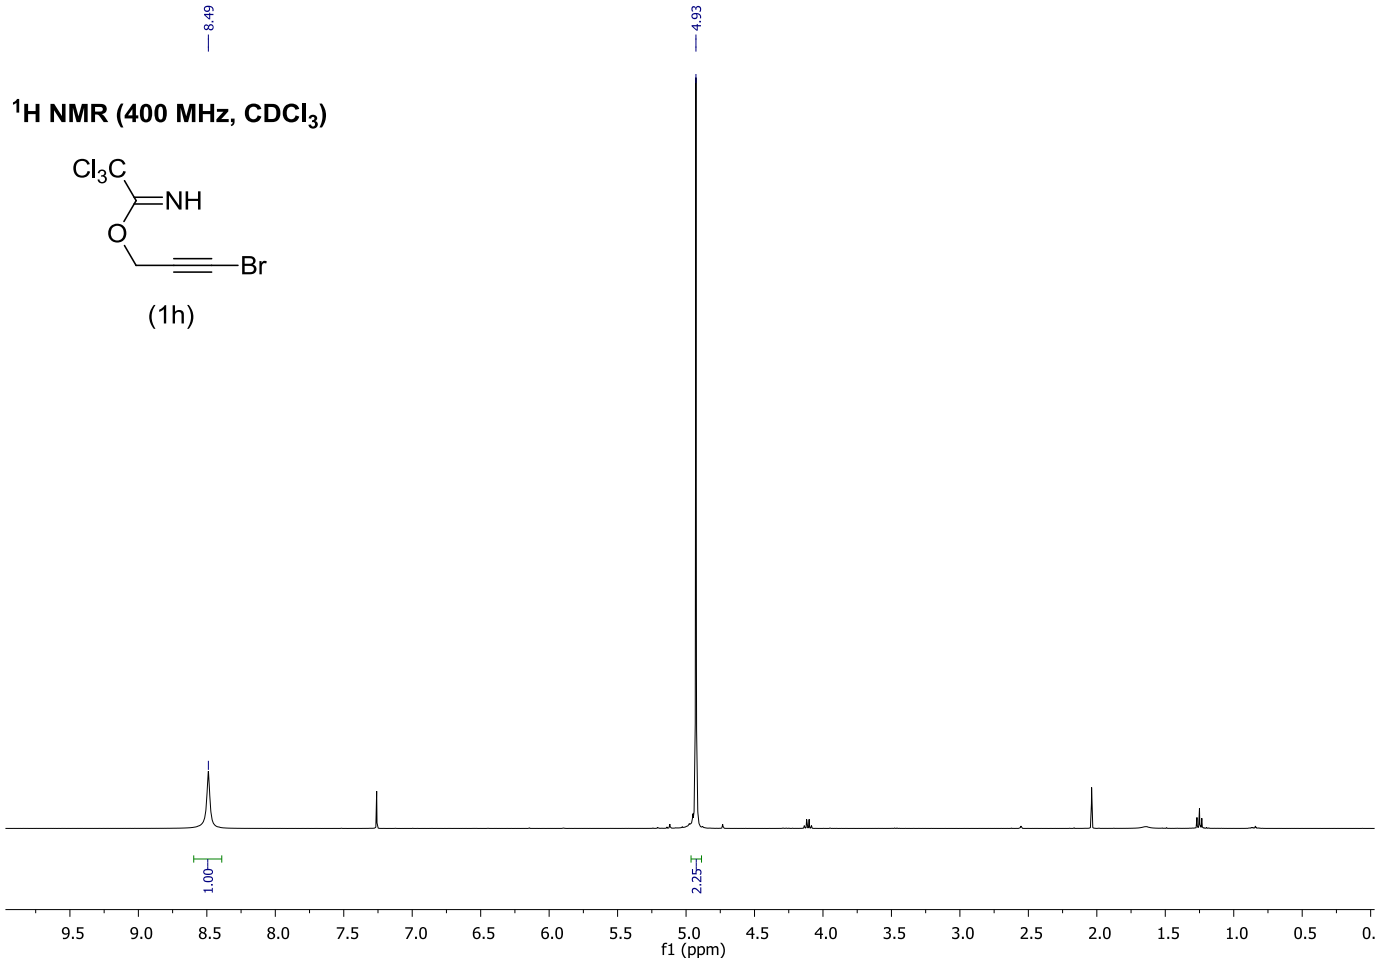

**<sup>13</sup>C NMR (100 MHz, CDCl<sub>3</sub>)**

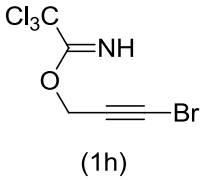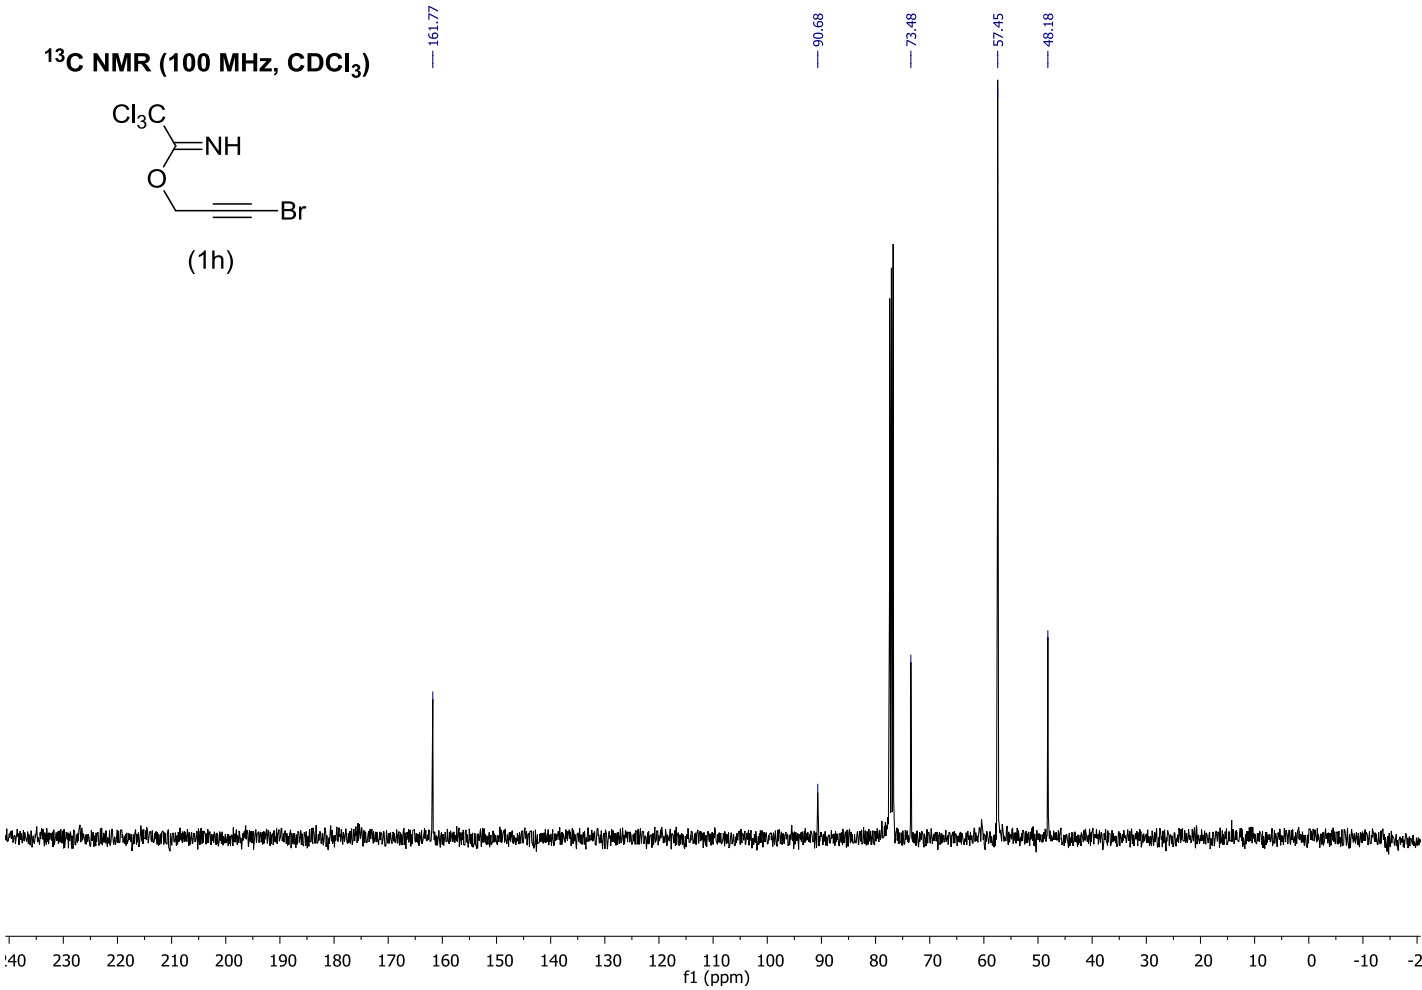



**<sup>1</sup>H NMR (400 MHz, CDCl<sub>3</sub>)**

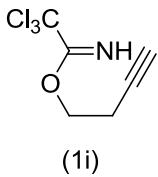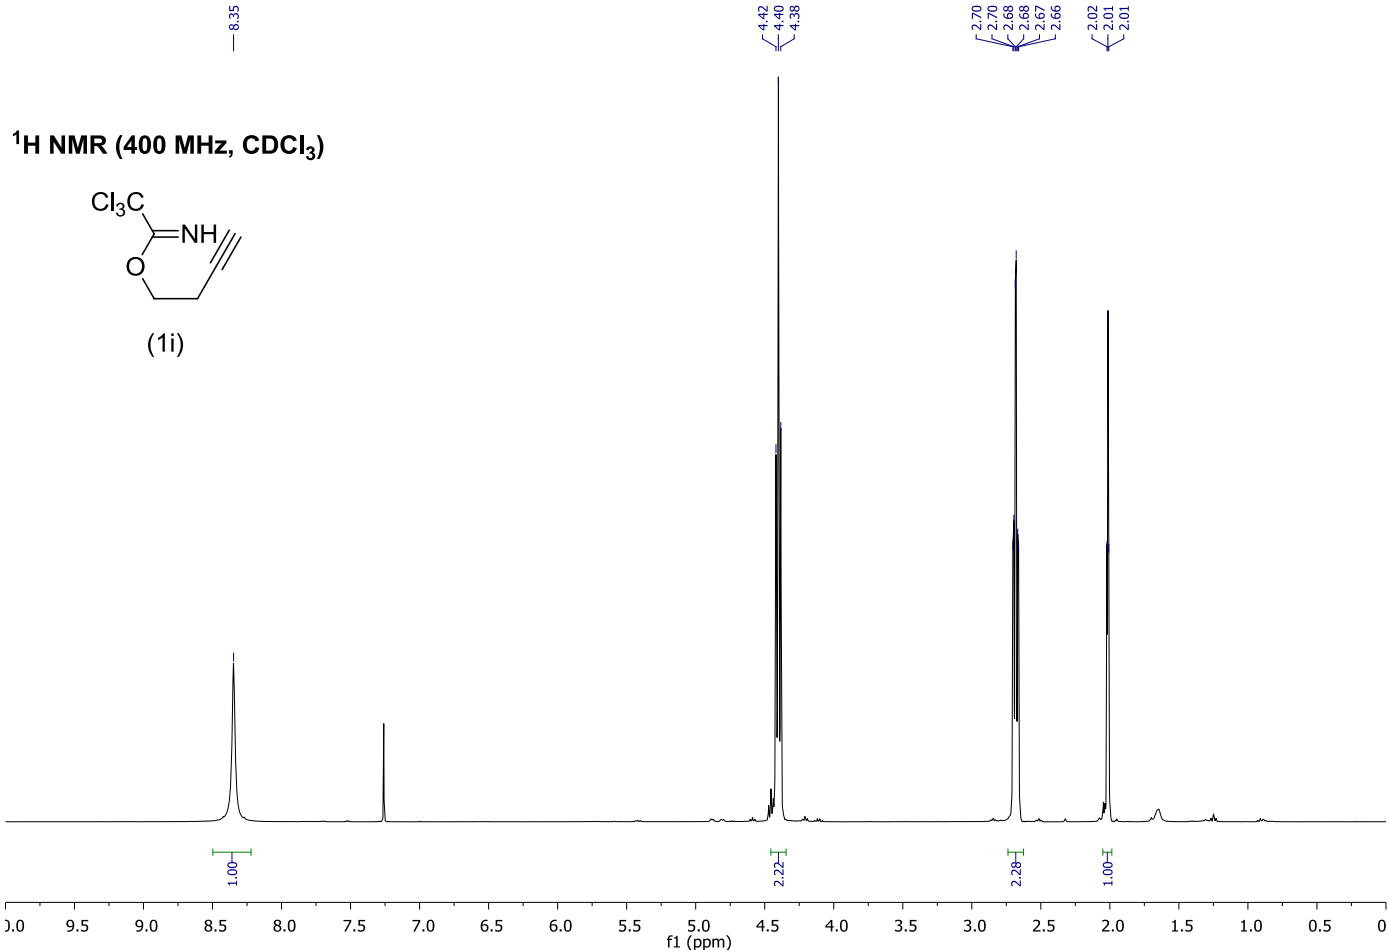

**<sup>13</sup>C NMR (100 MHz, CDCl<sub>3</sub>)**

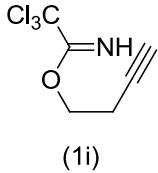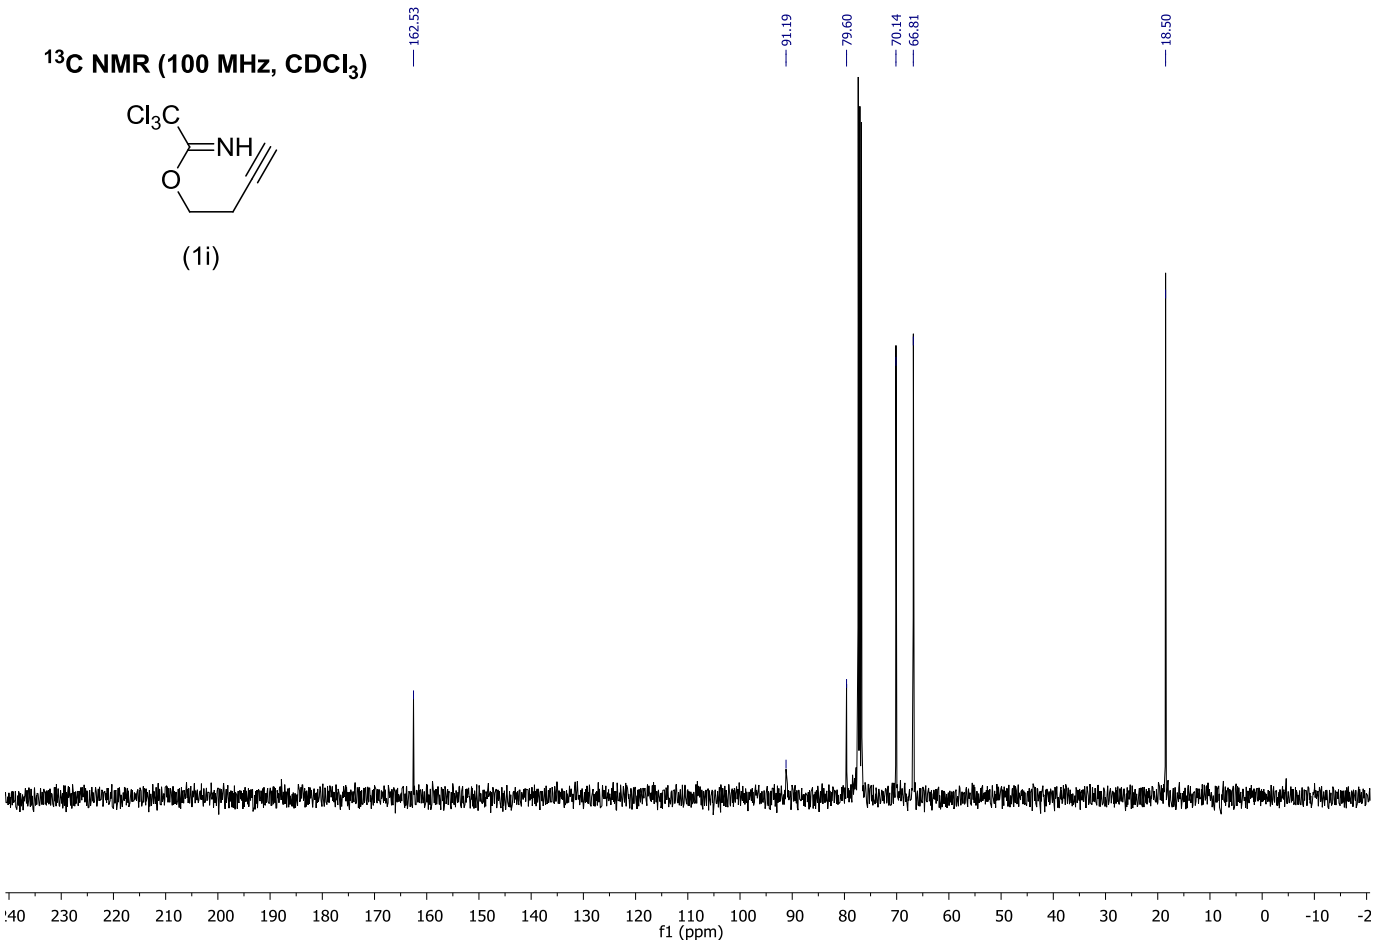

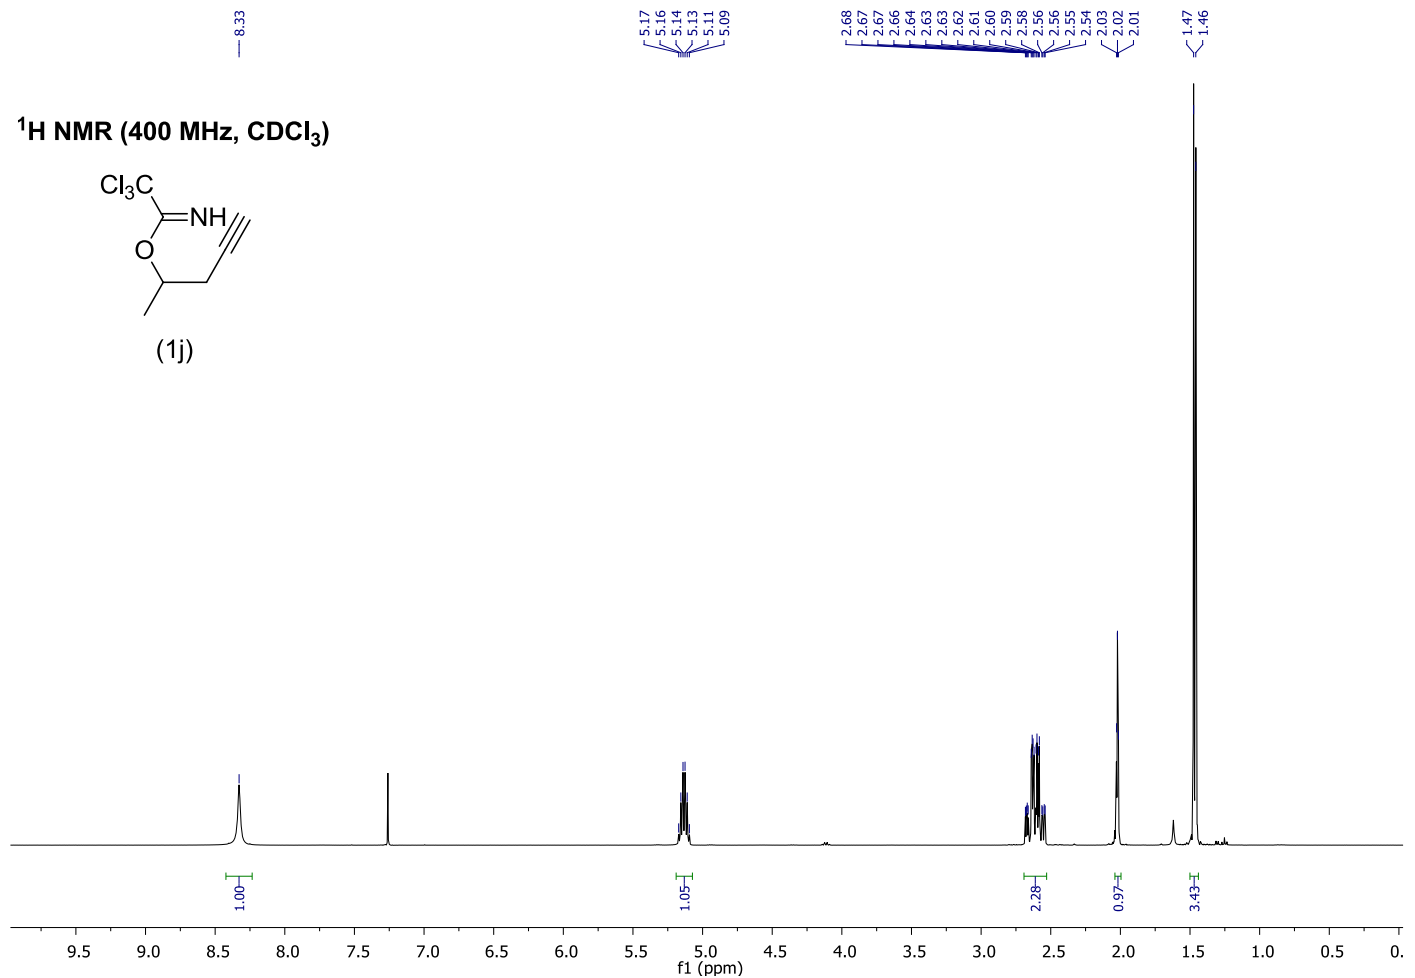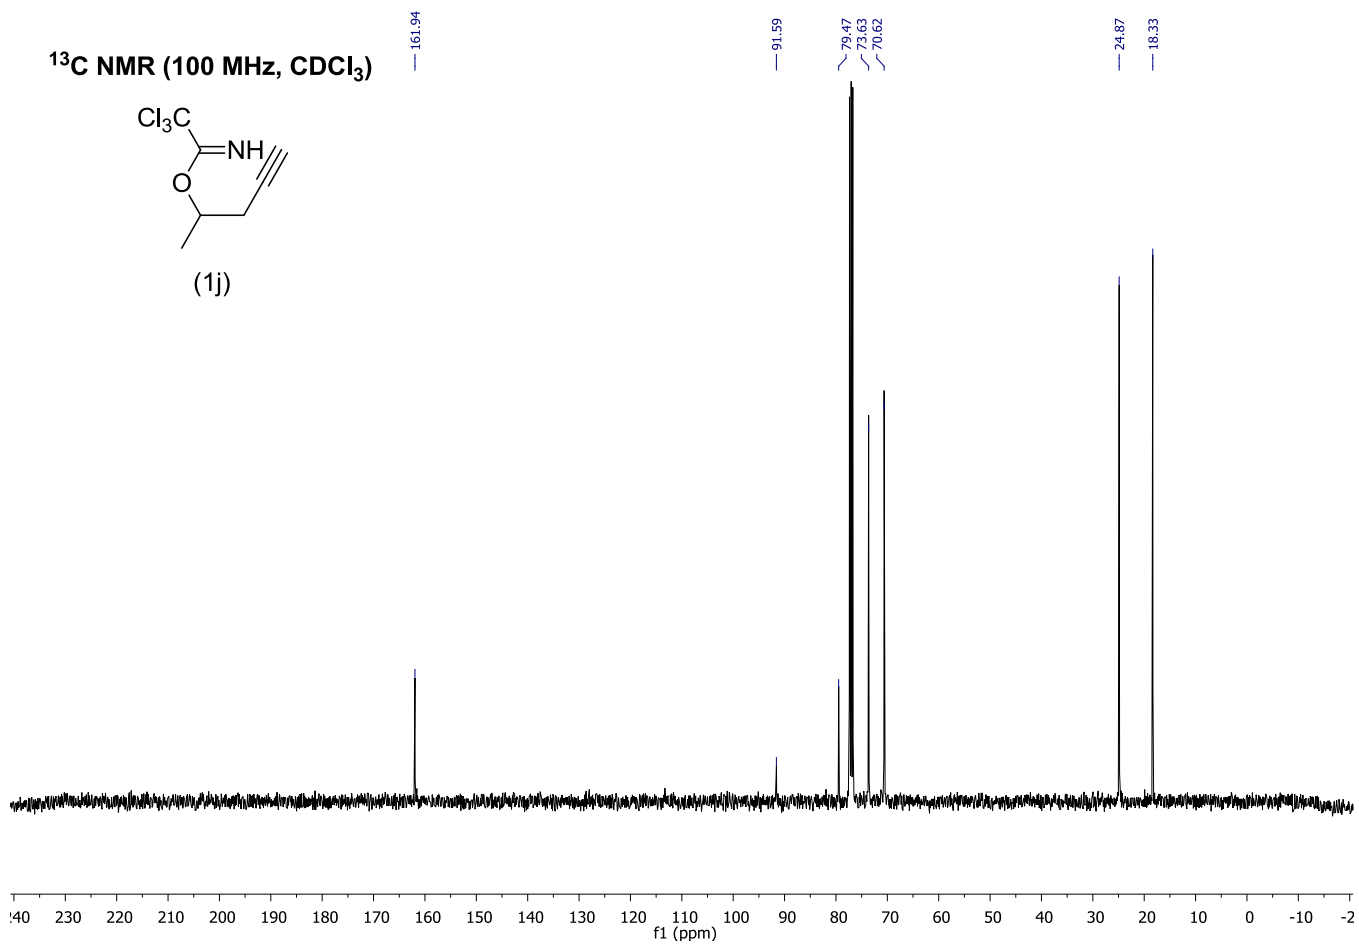

<sup>1</sup>H NMR (400 MHz, CDCl<sub>3</sub>)

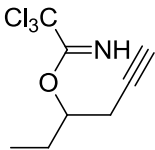

(1k)

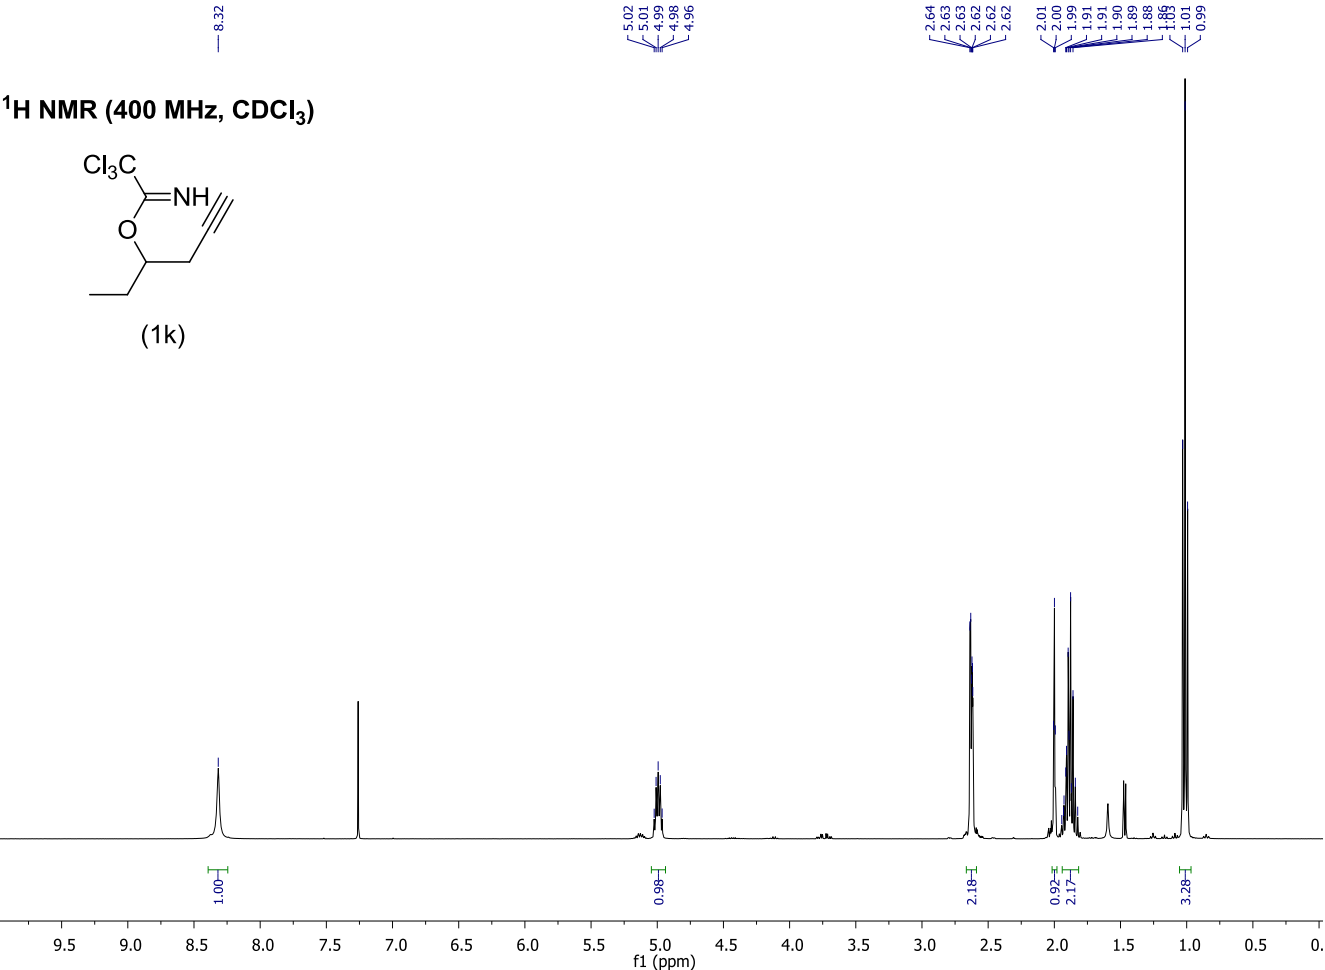

<sup>13</sup>C NMR (100 MHz, CDCl<sub>3</sub>)

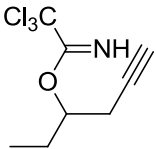

(1k)

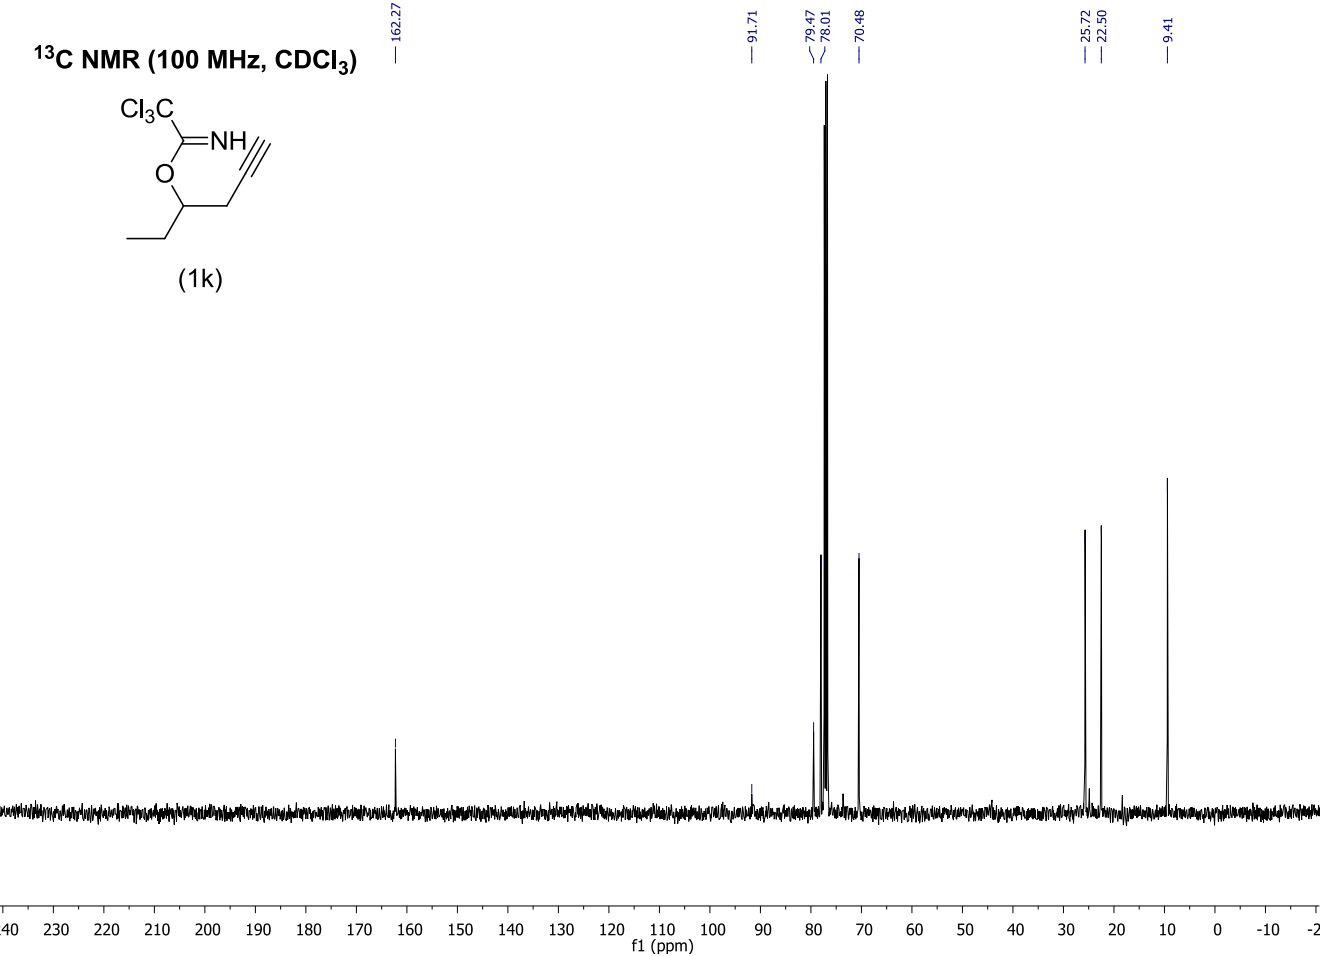

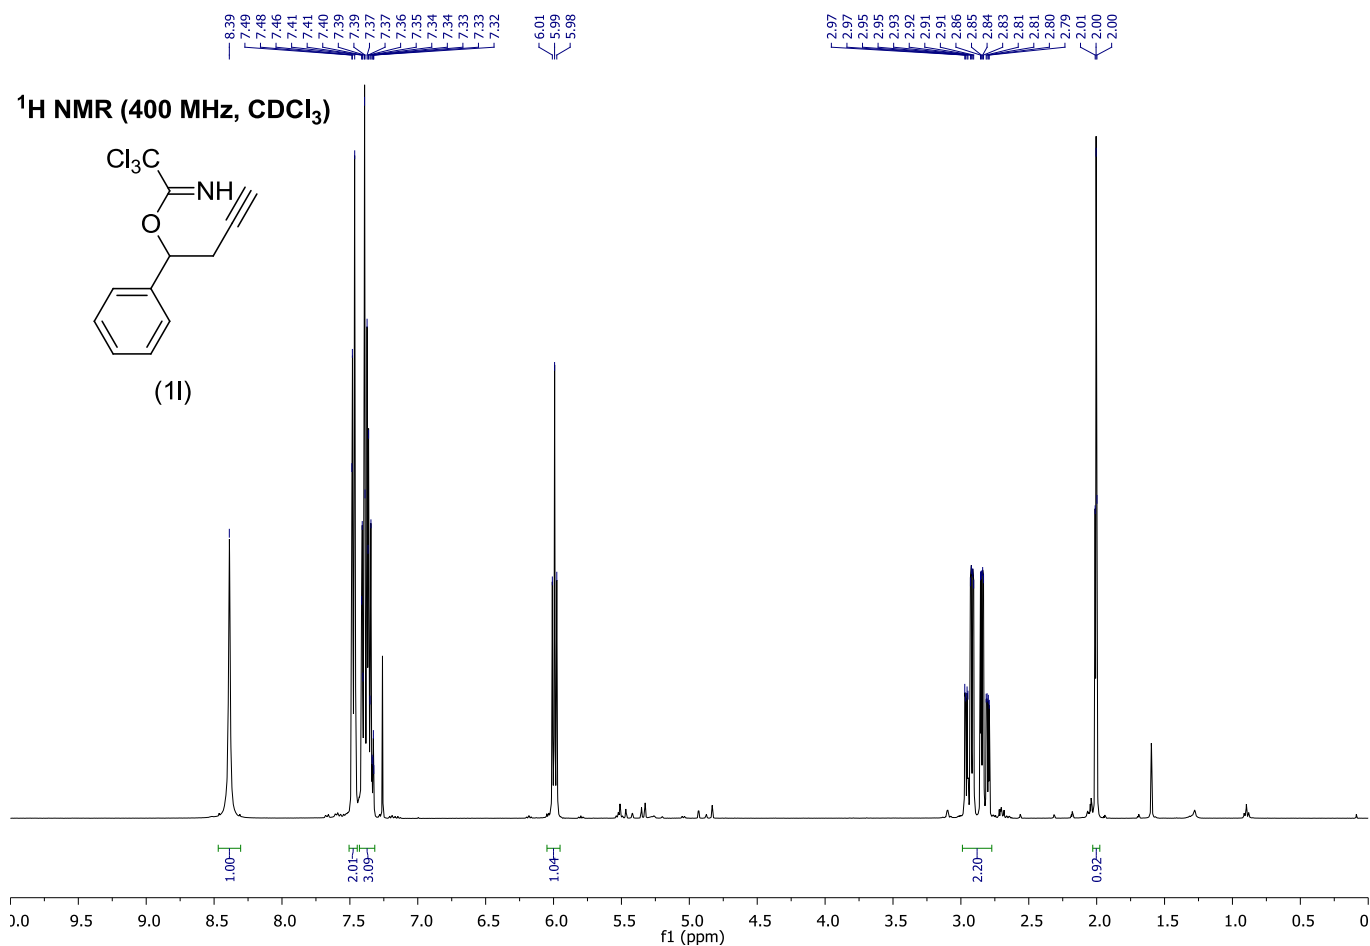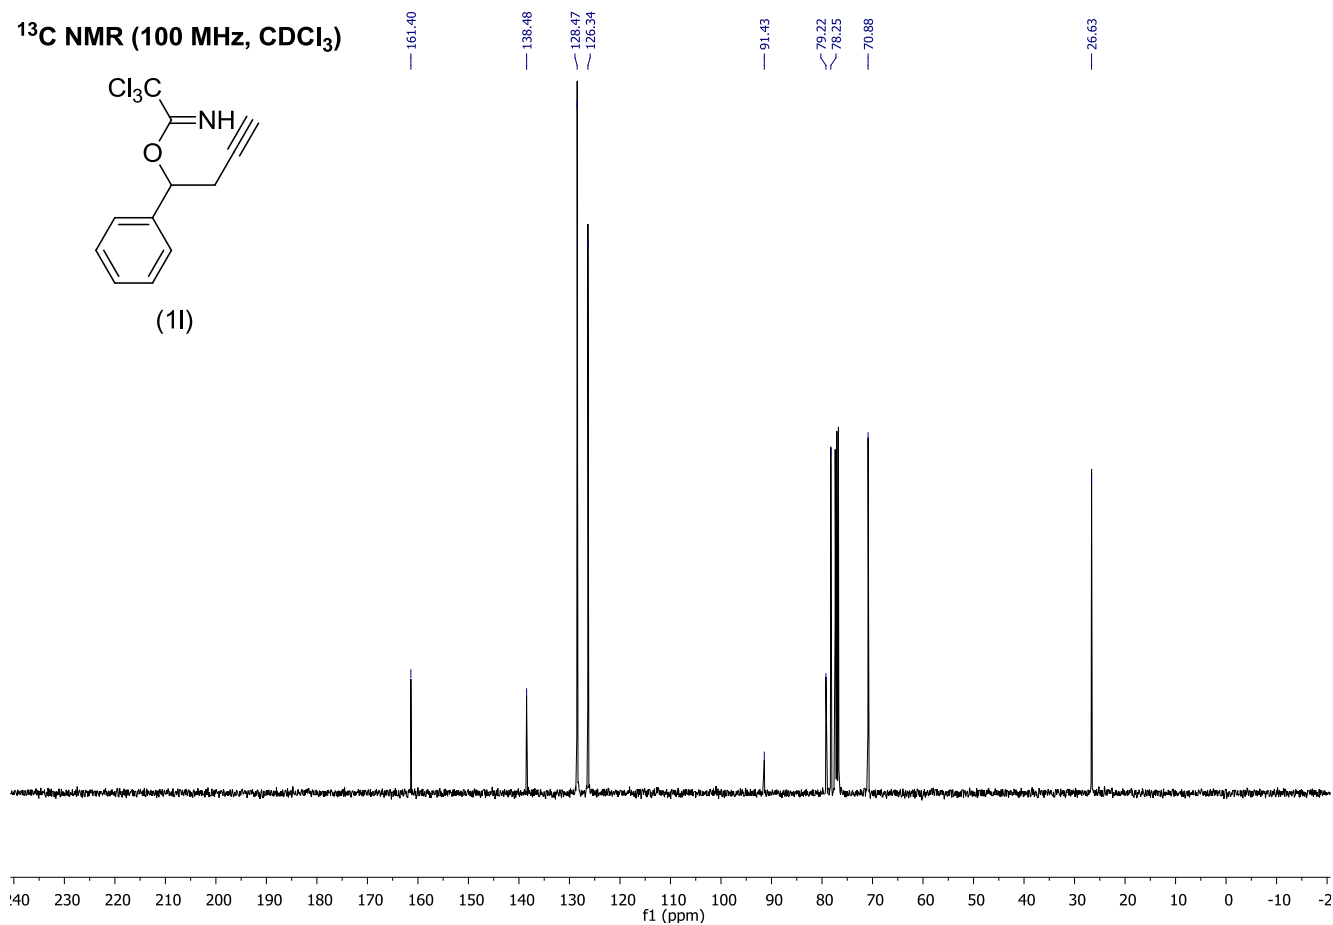

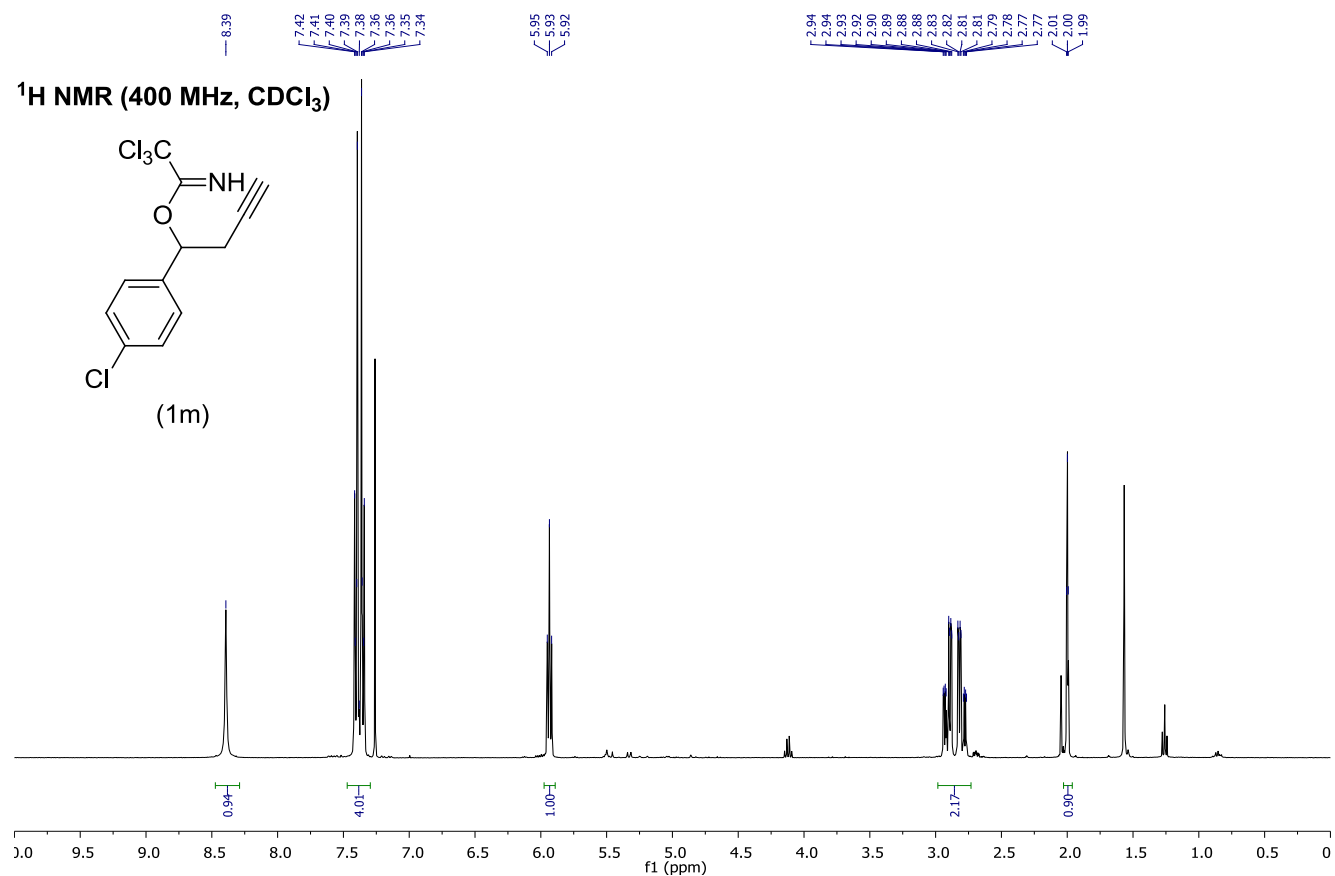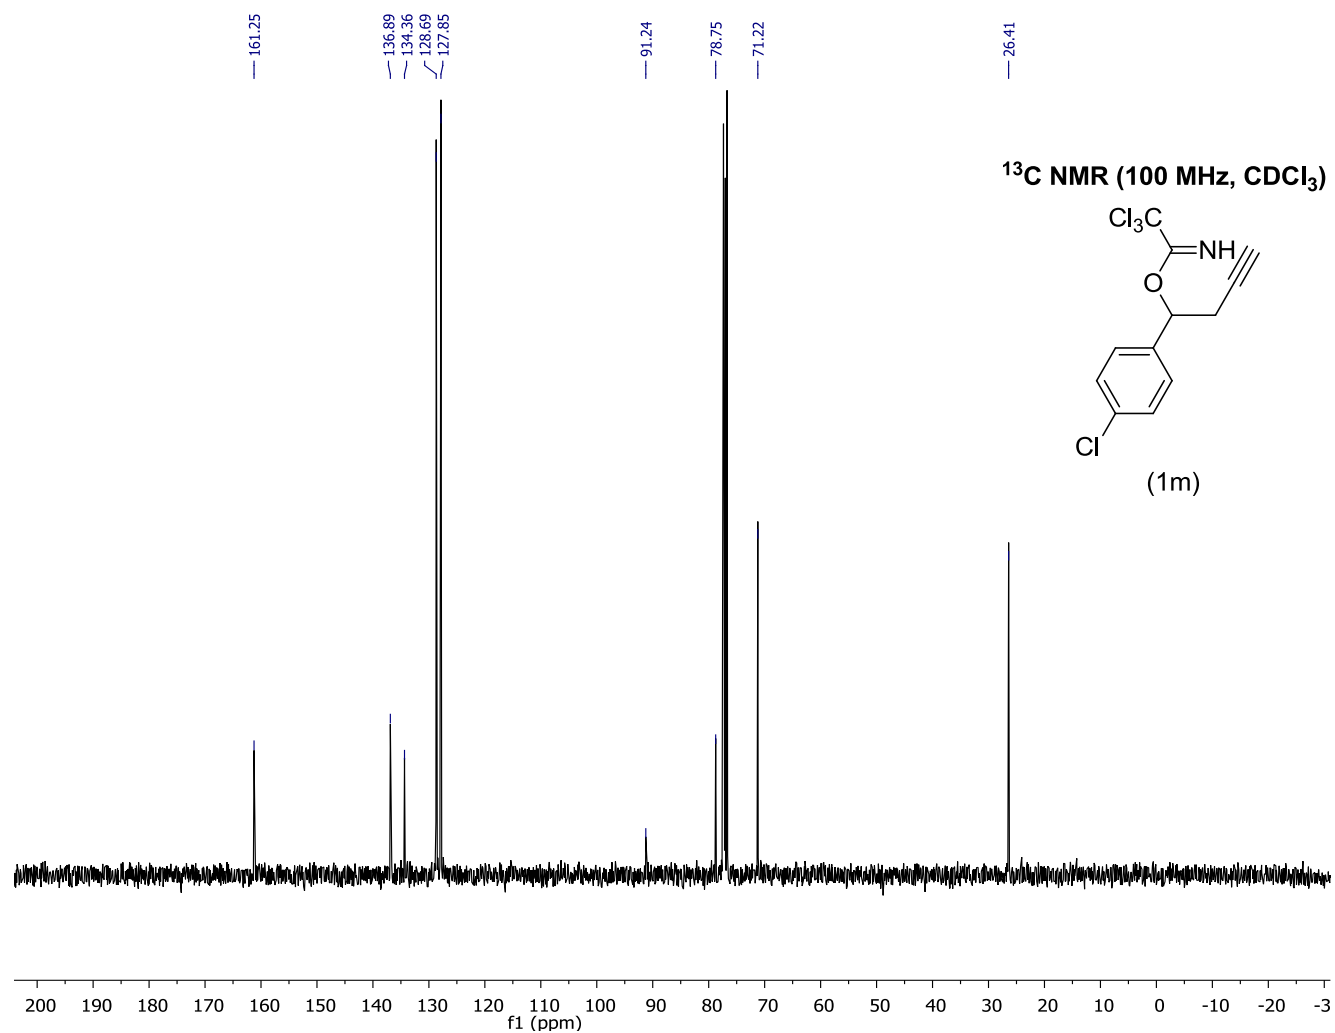

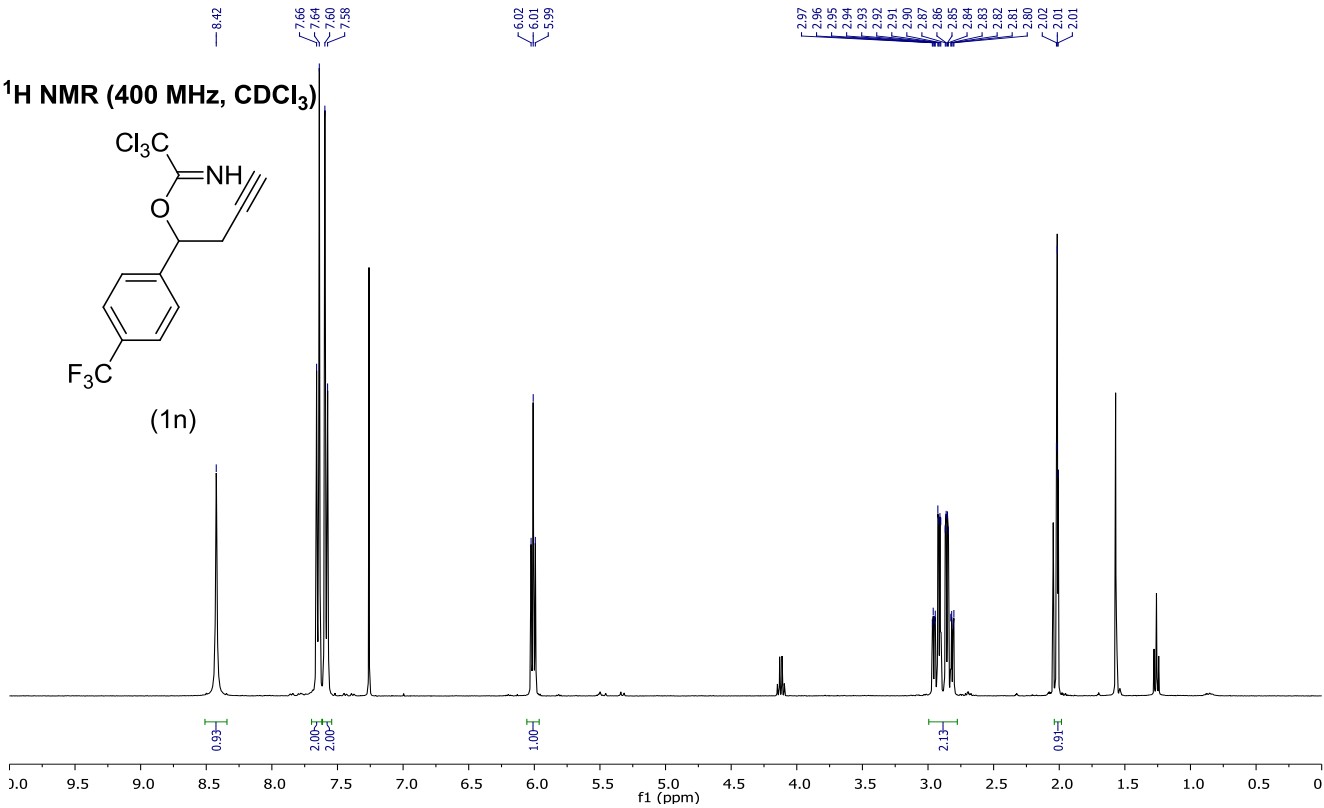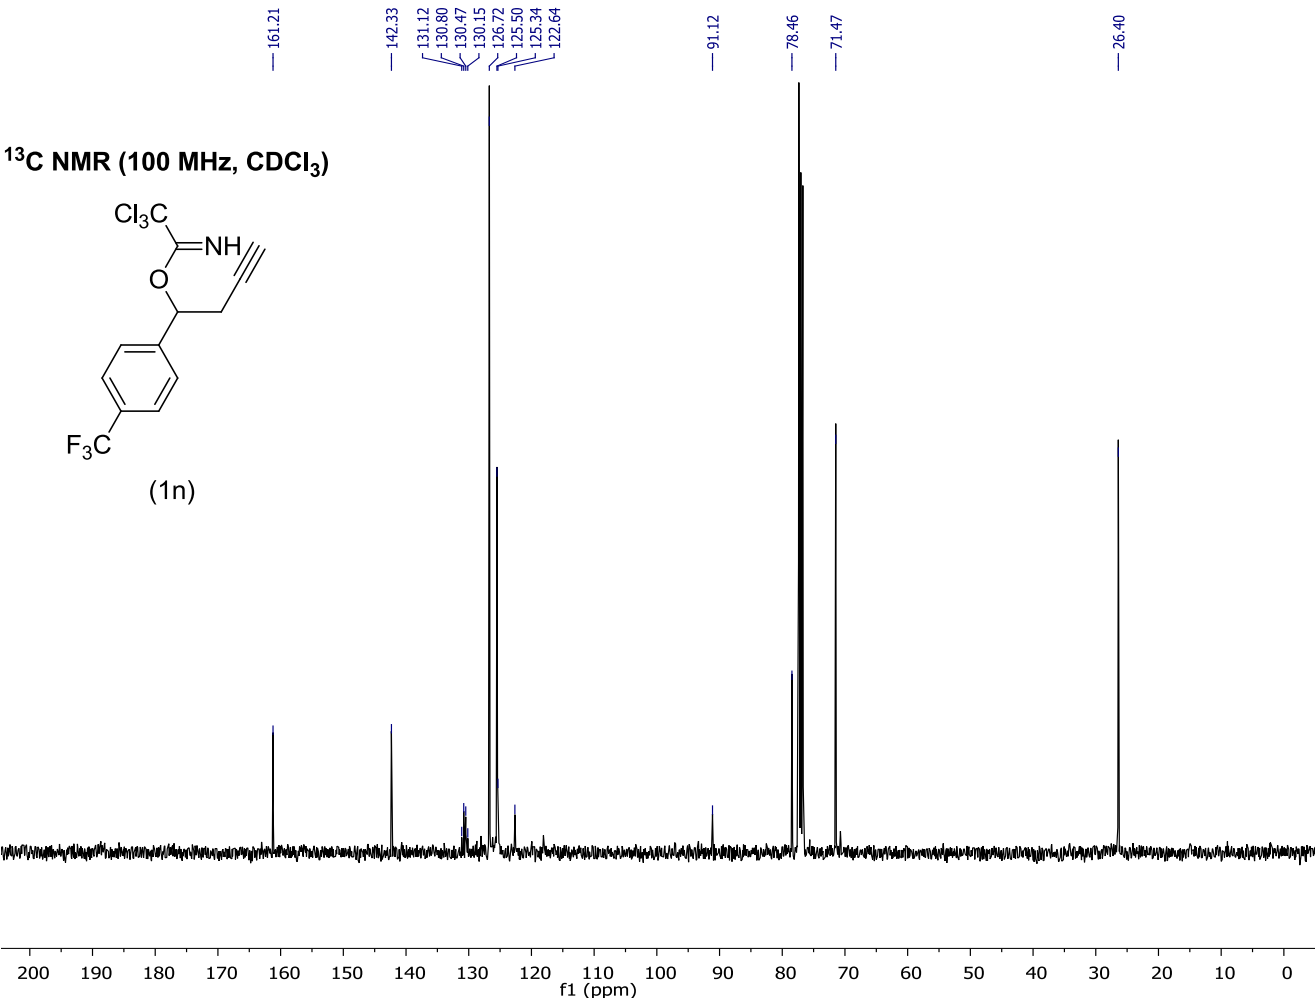

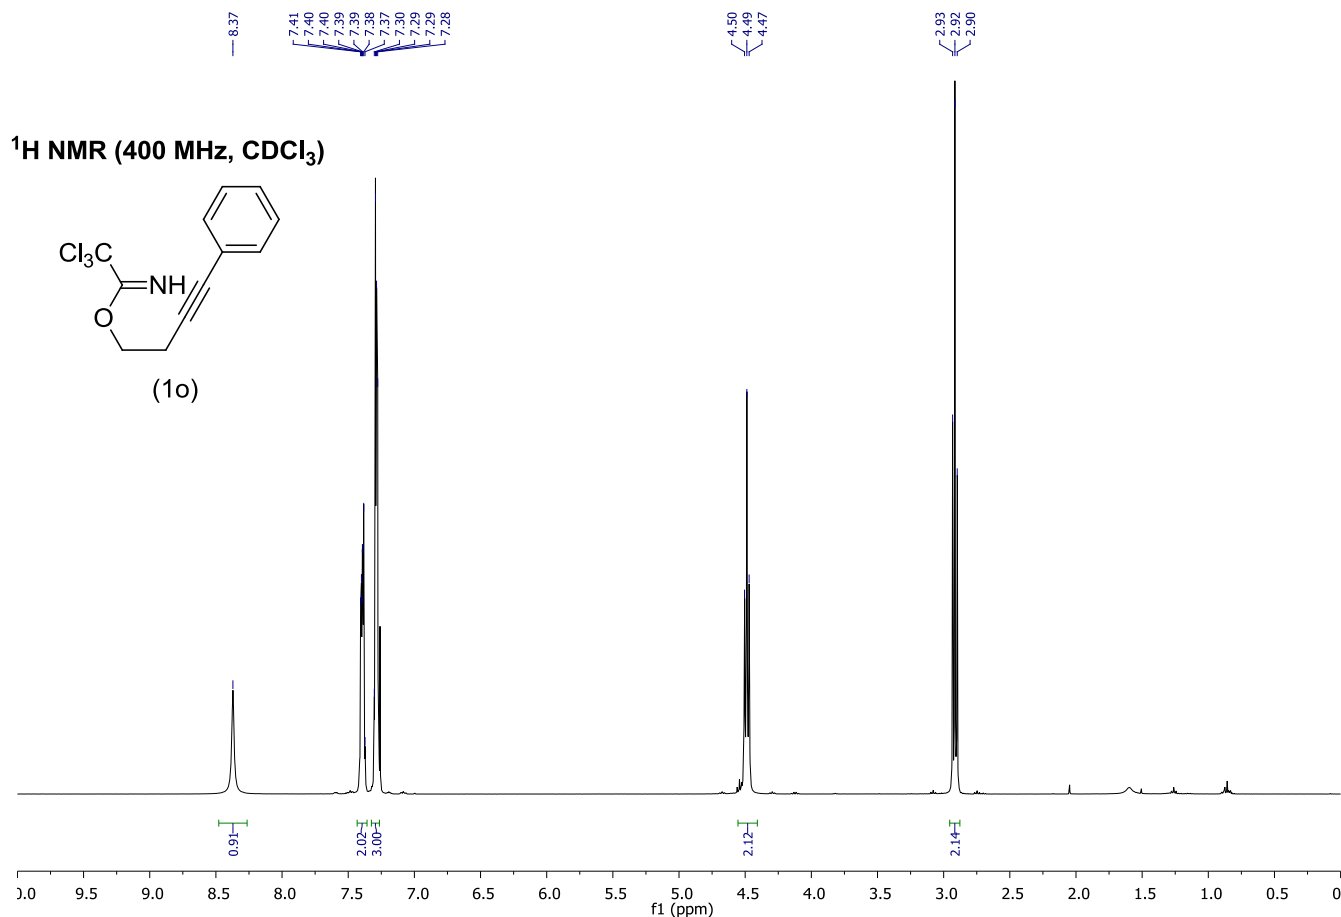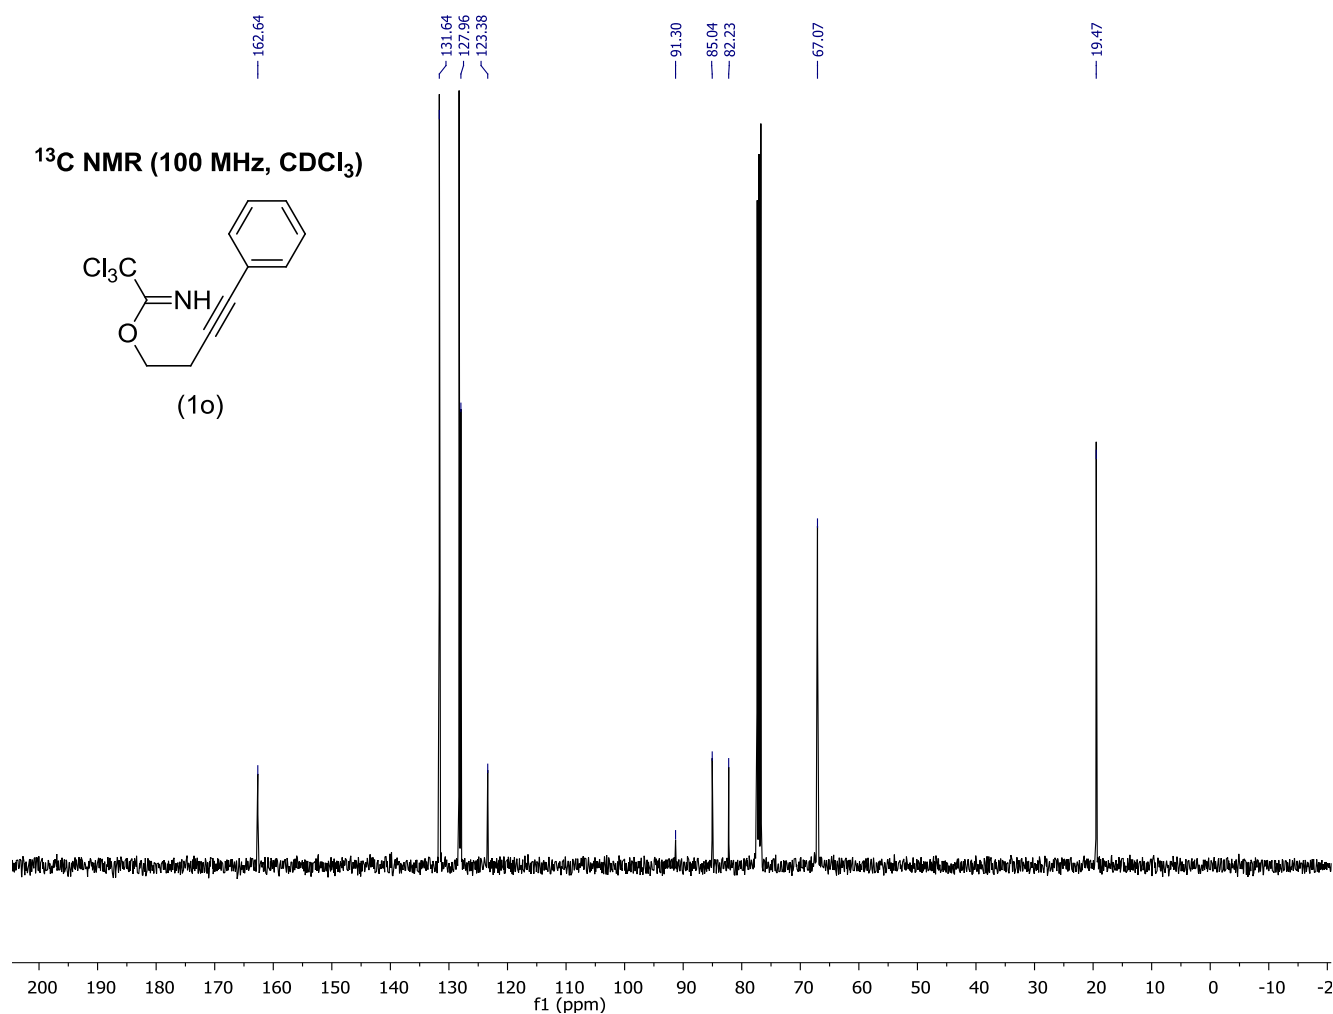



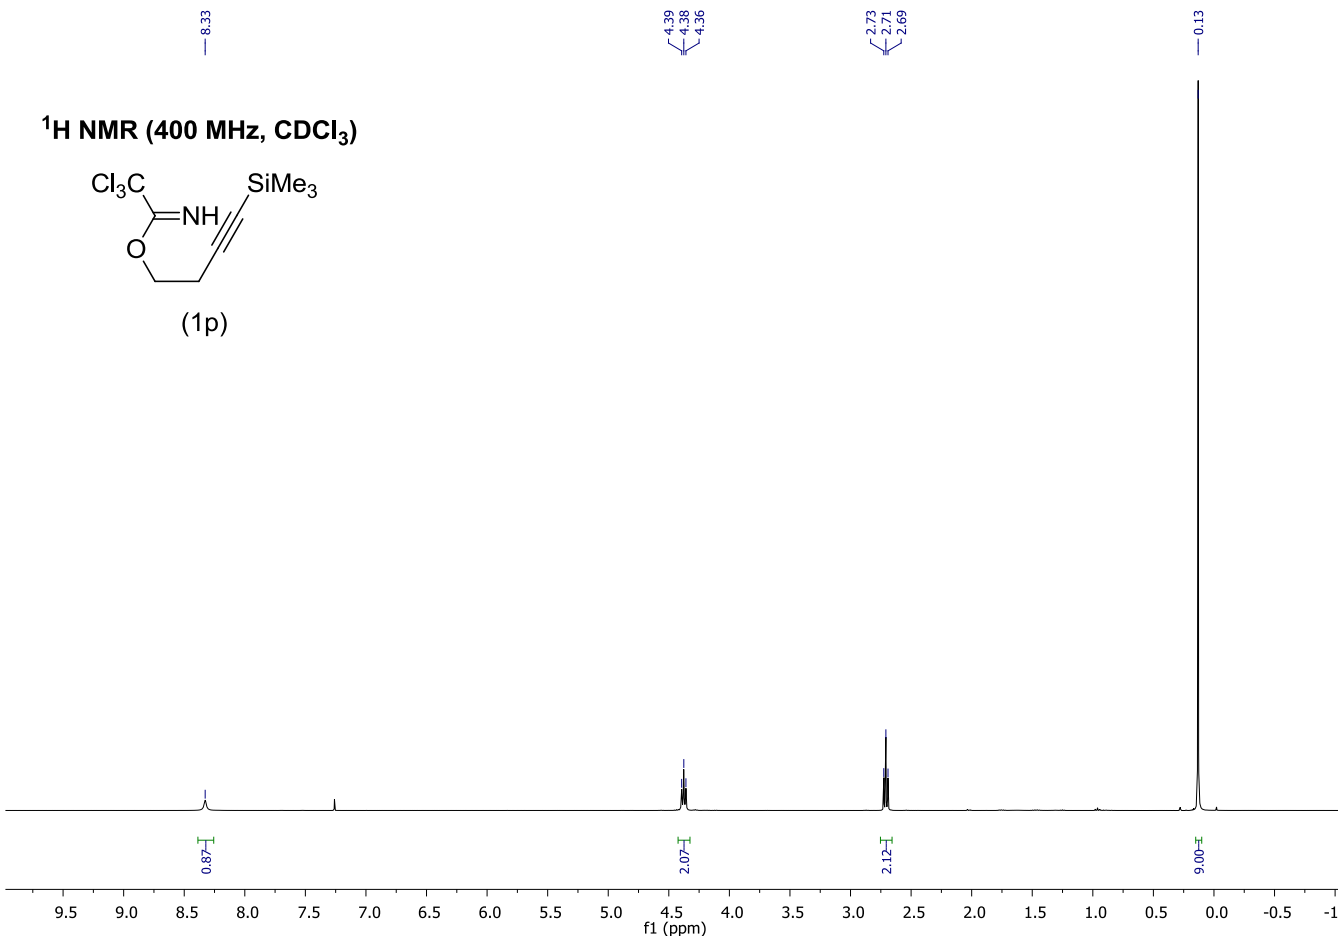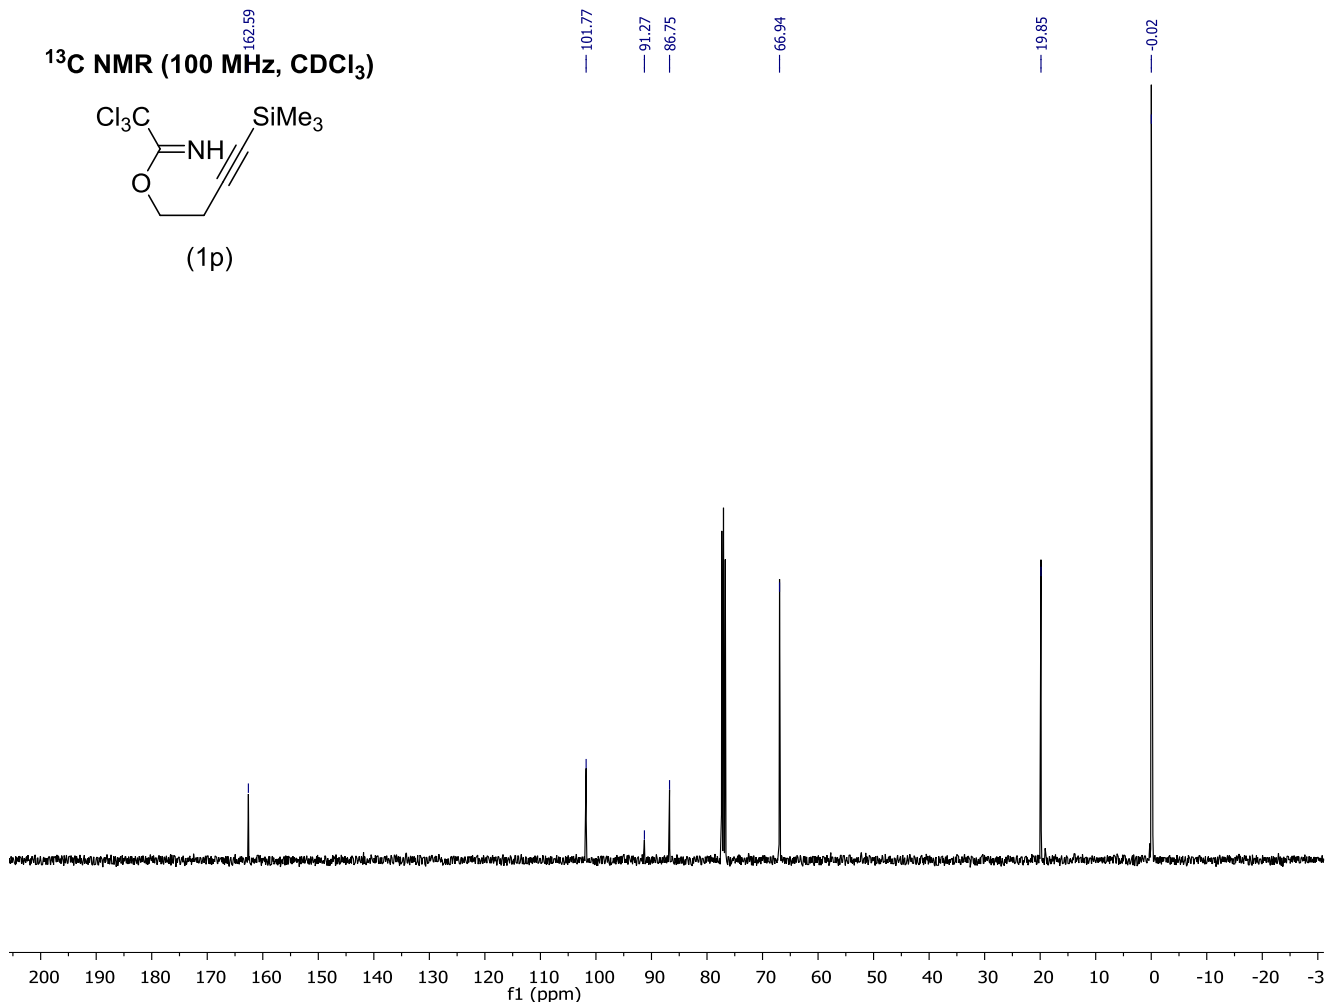

**<sup>1</sup>H NMR (400 MHz, CDCl<sub>3</sub>)**

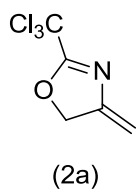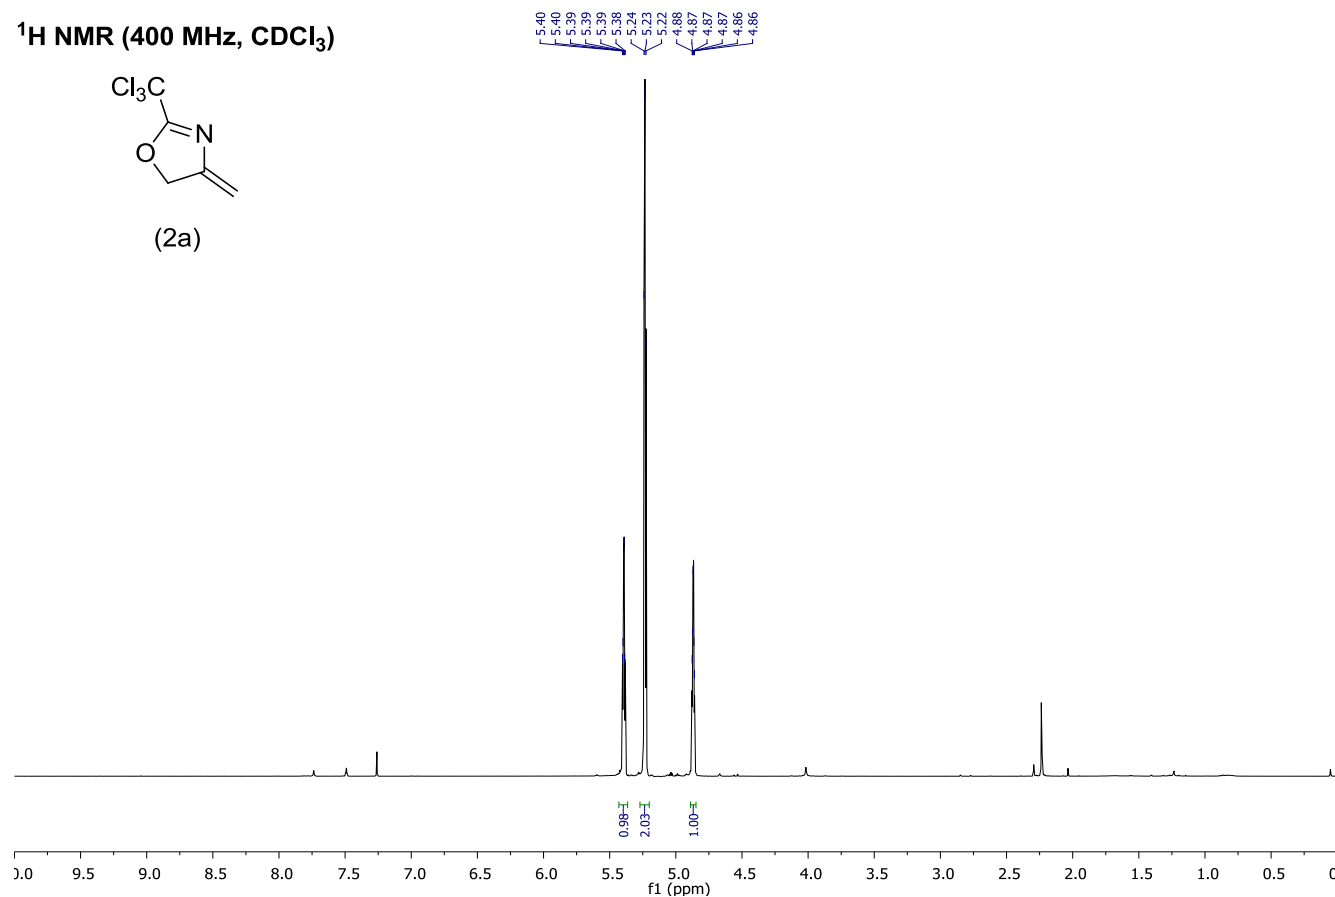

**<sup>13</sup>C NMR (100 MHz, CDCl<sub>3</sub>)**

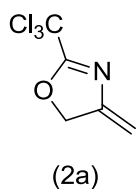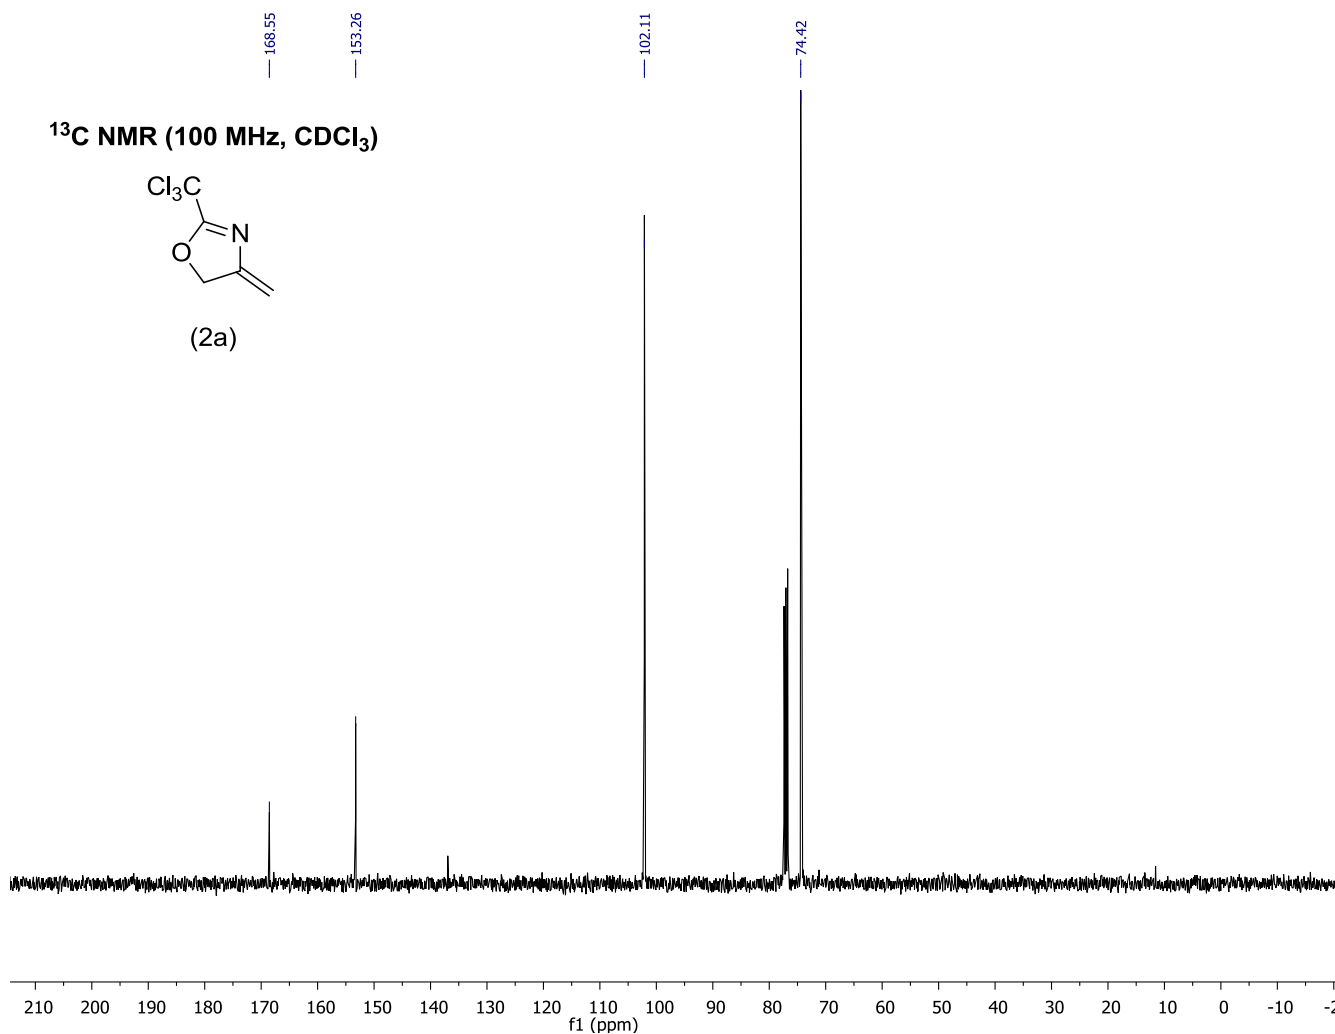

**<sup>1</sup>H NMR (400 MHz, CDCl<sub>3</sub>)**

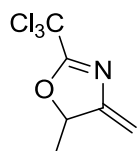

(2b)

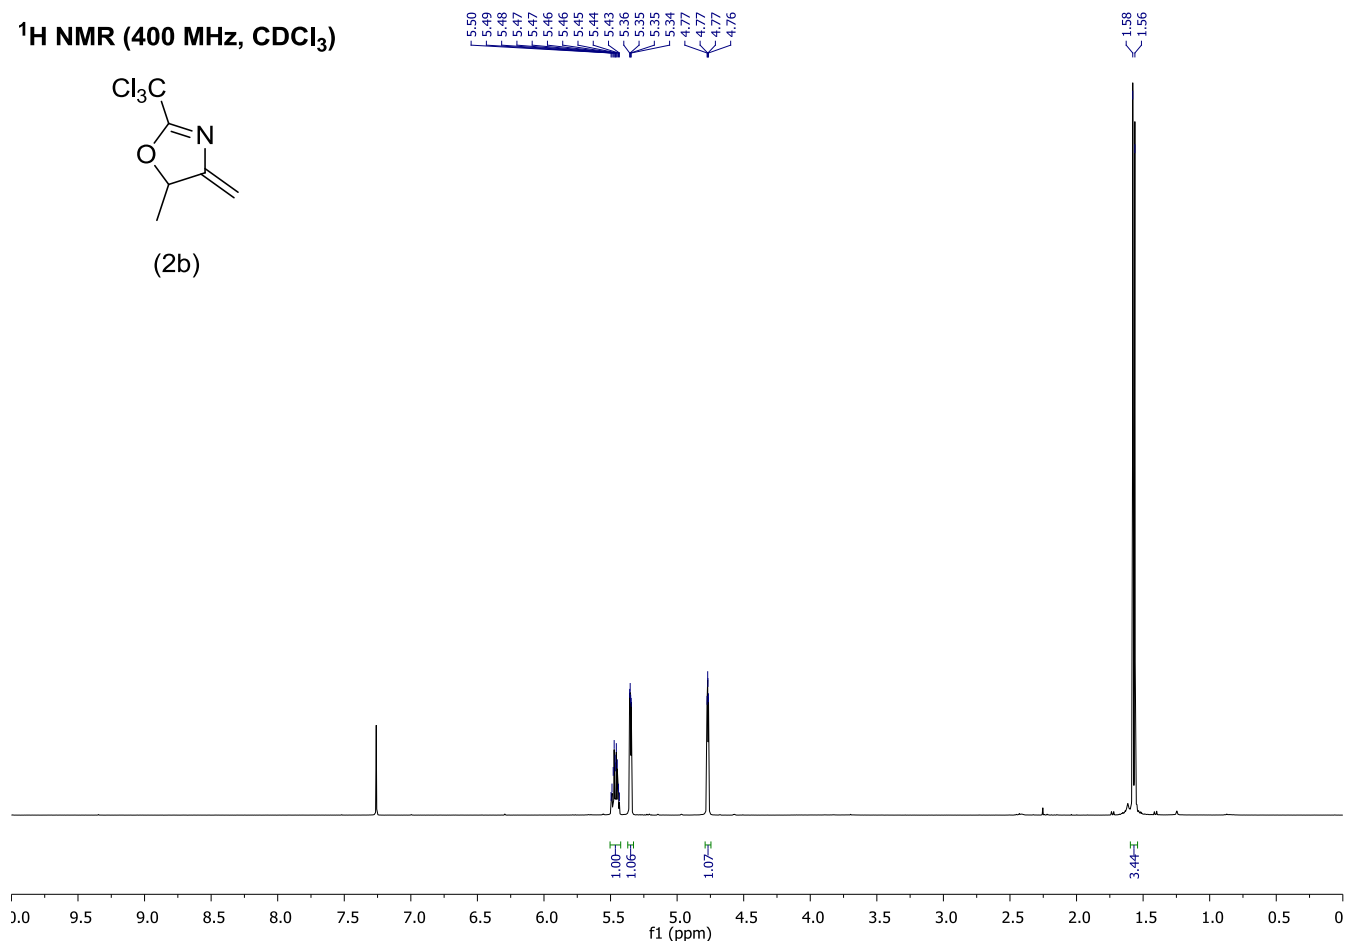

**<sup>13</sup>C NMR (100 MHz, CDCl<sub>3</sub>)**

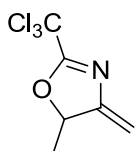

(2b)

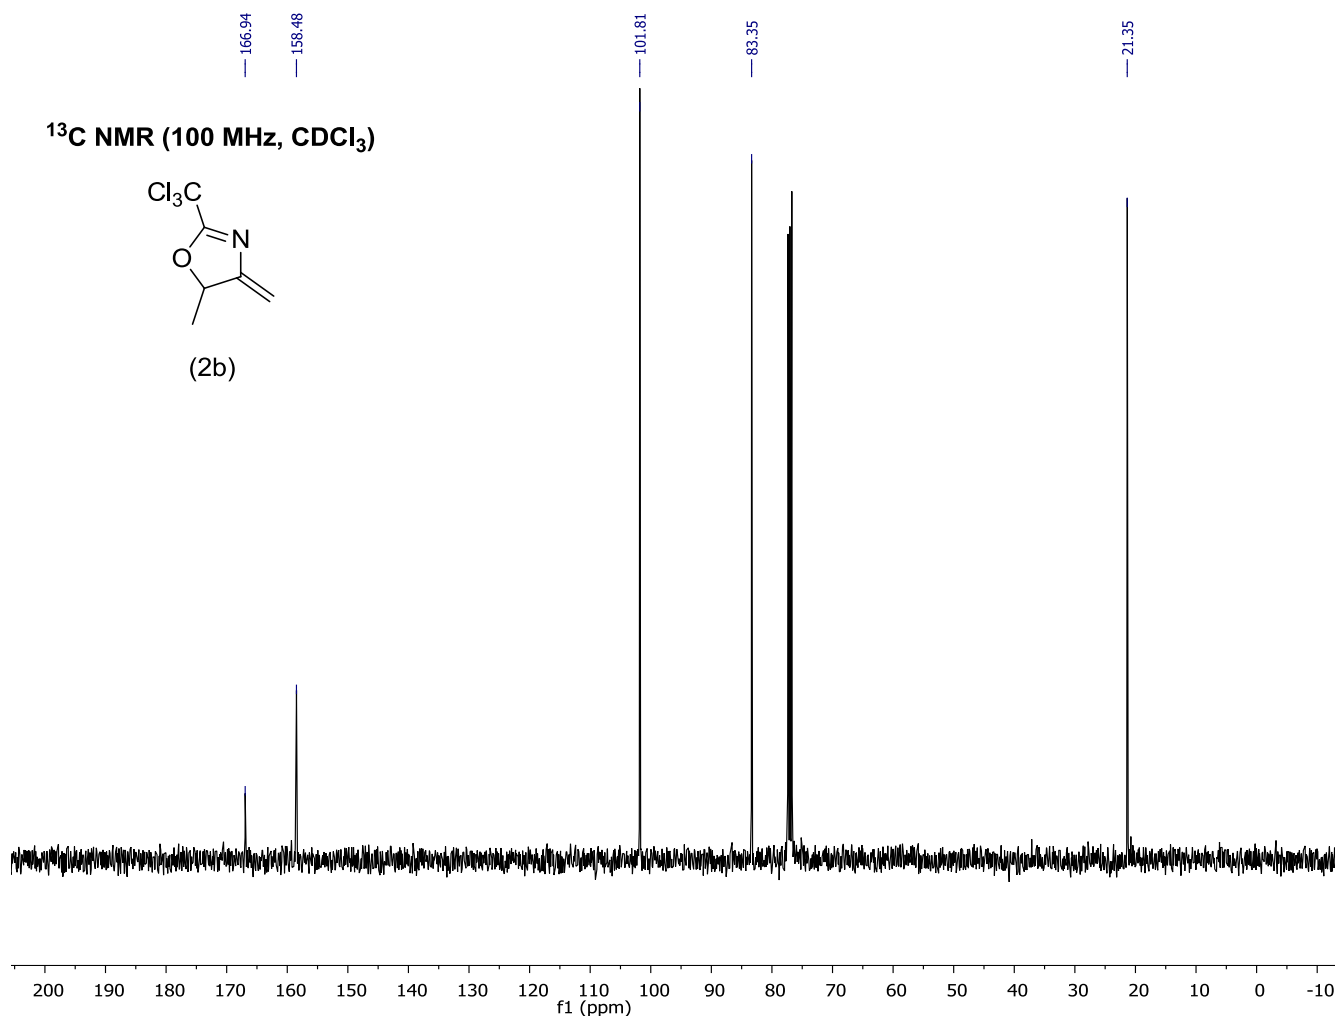

**<sup>1</sup>H NMR (400 MHz, CDCl<sub>3</sub>)**

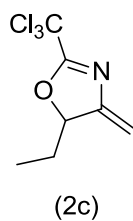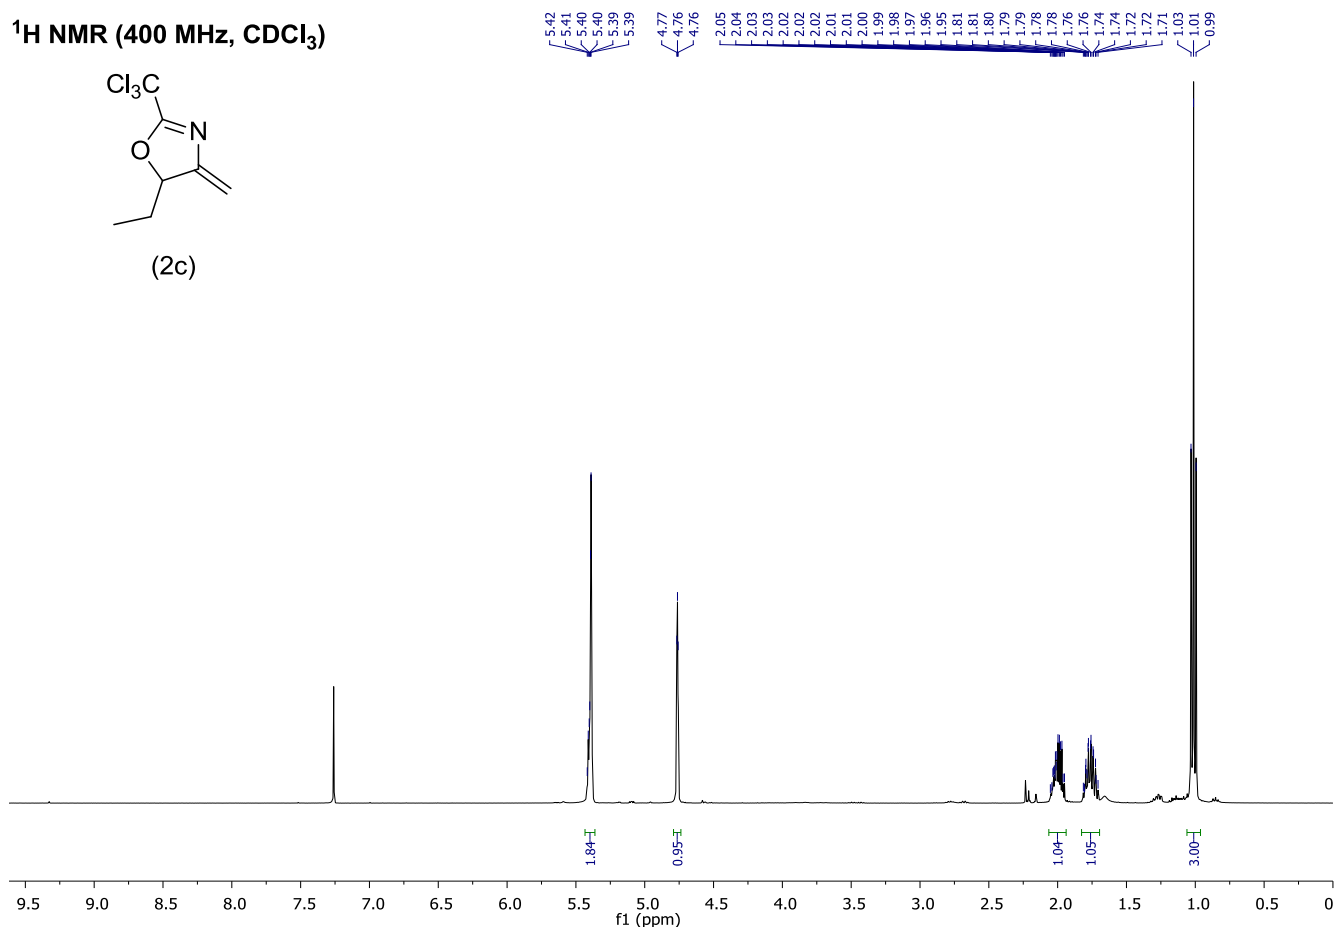

167.31

156.68

102.06

87.76

28.51

7.61

**<sup>13</sup>C NMR (100 MHz, CDCl<sub>3</sub>)**

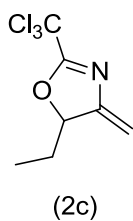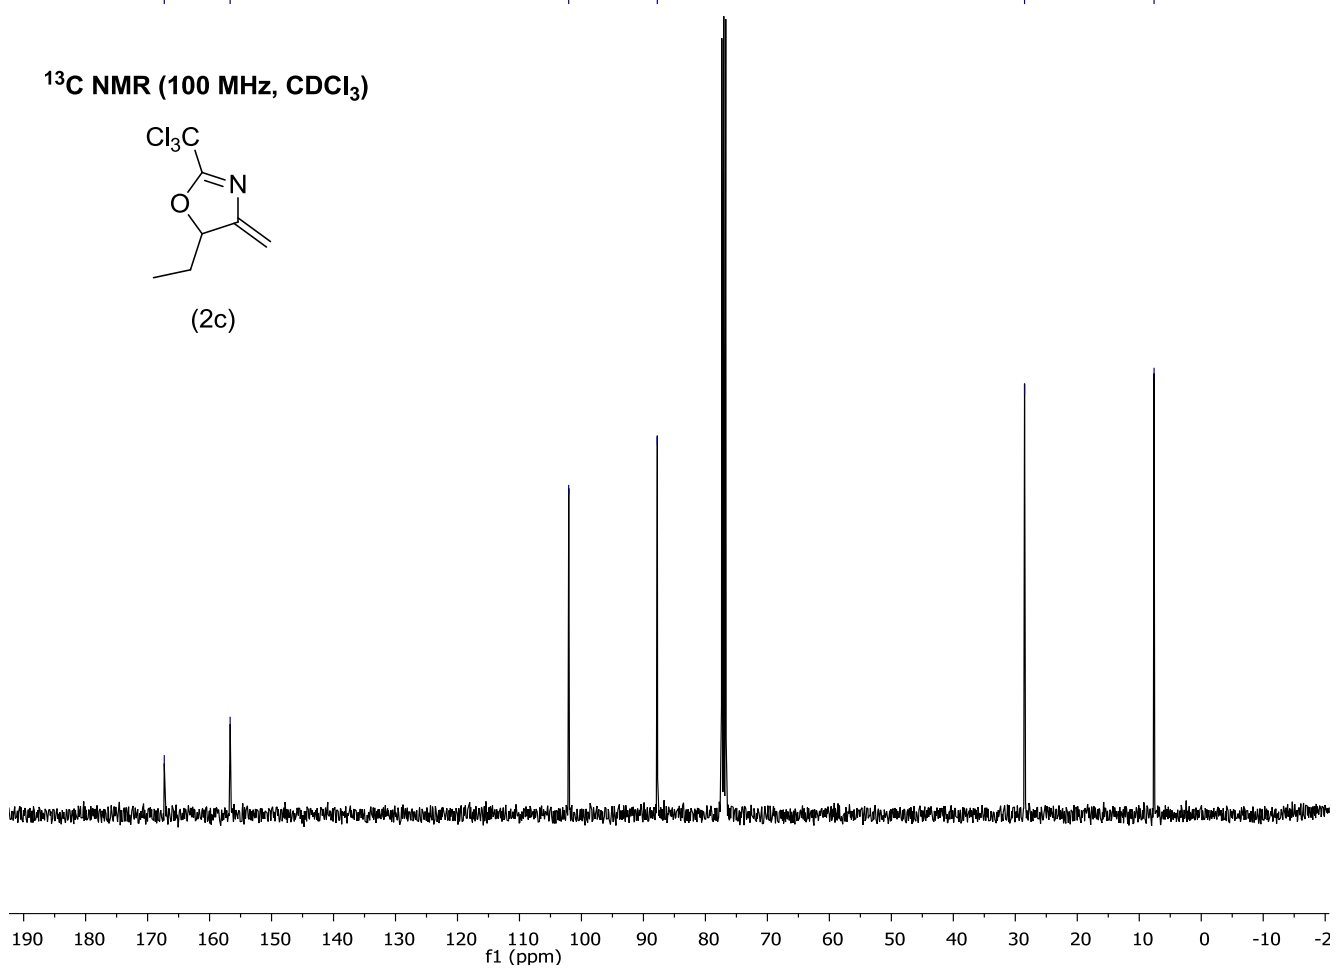

**<sup>1</sup>H NMR (400 MHz, CDCl<sub>3</sub>)**

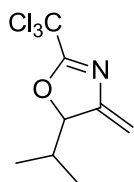

(2d)

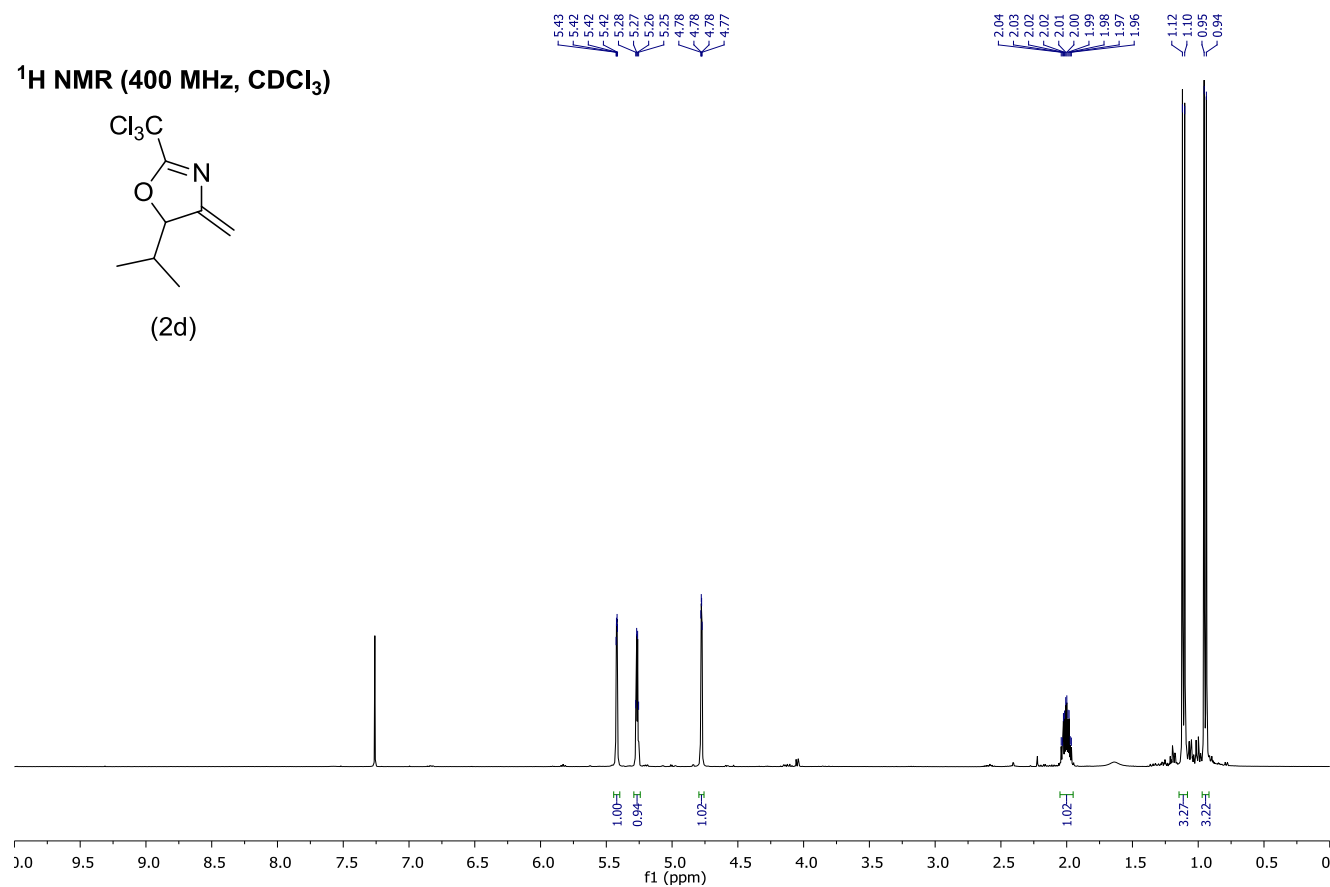

**<sup>13</sup>C NMR (100 MHz, CDCl<sub>3</sub>)**

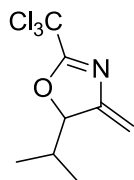

(2d)

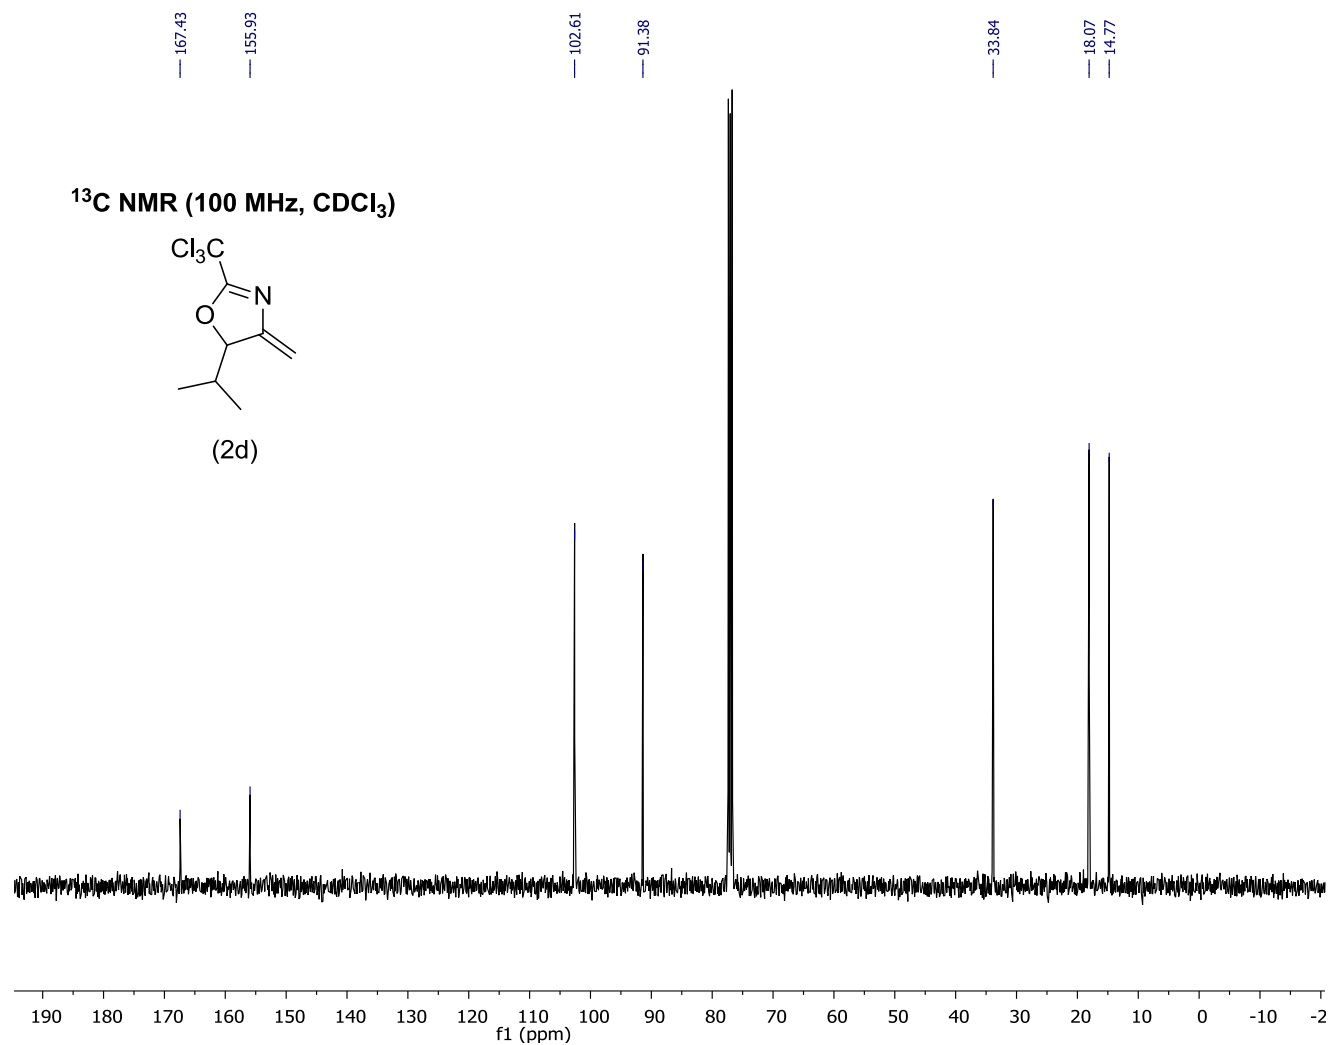

**<sup>1</sup>H NMR (400 MHz, CDCl<sub>3</sub>)**

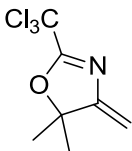

(2e)

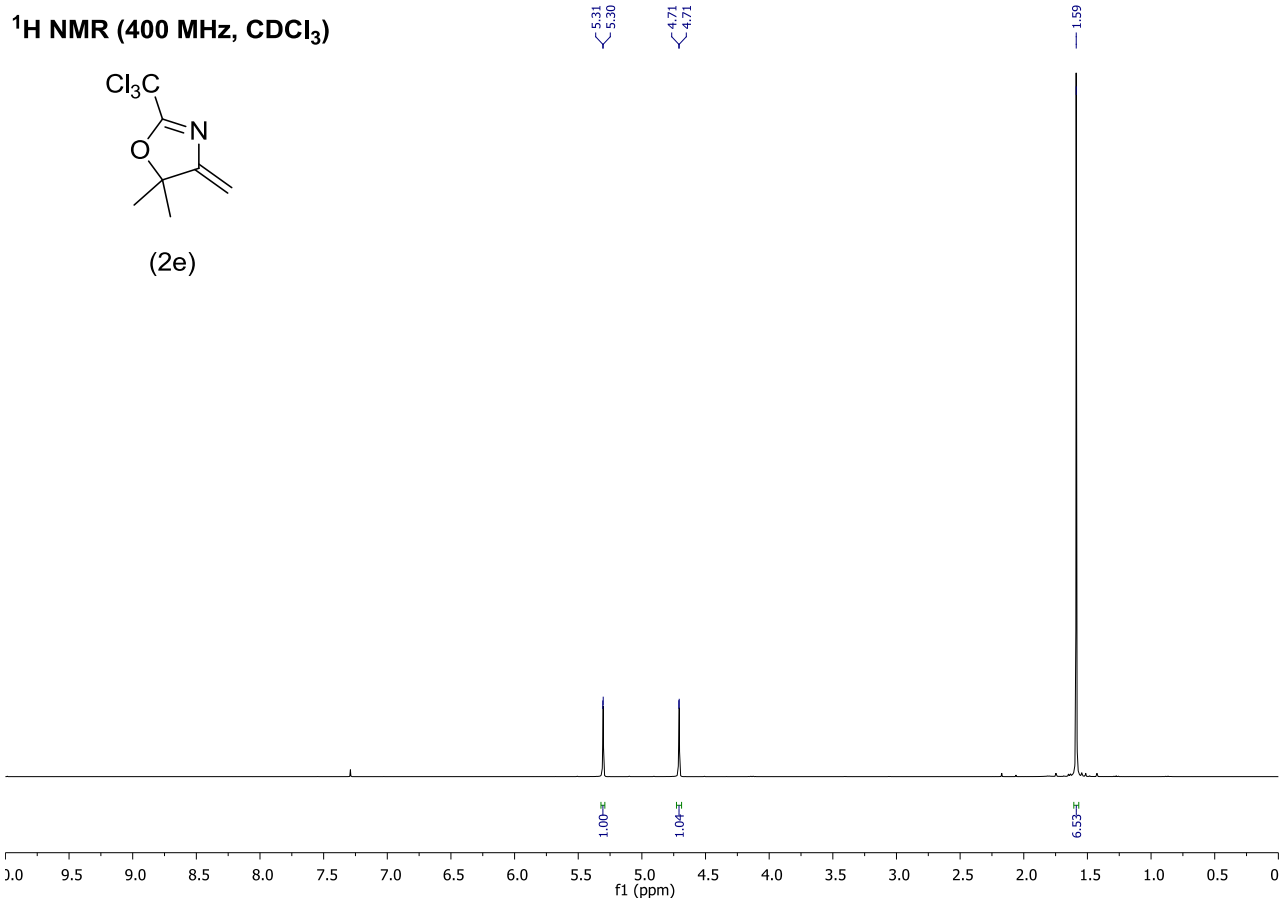

**<sup>13</sup>C NMR (100 MHz, CDCl<sub>3</sub>)**

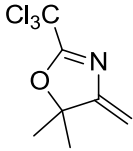

(2e)

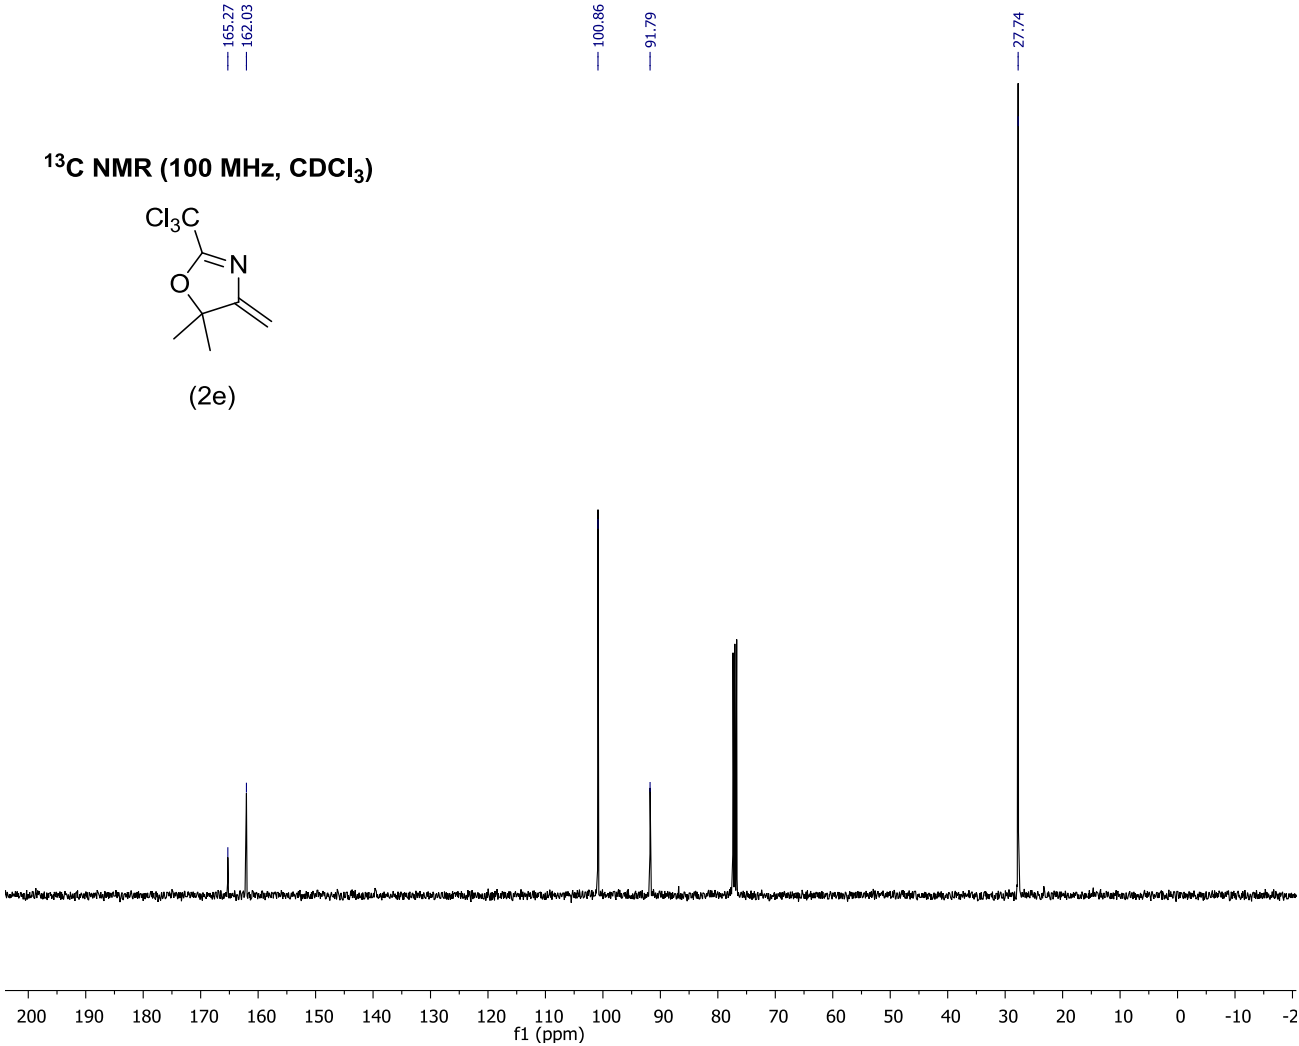

**<sup>1</sup>H NMR (400 MHz, CDCl<sub>3</sub>)**

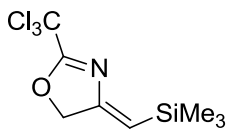

(2g)

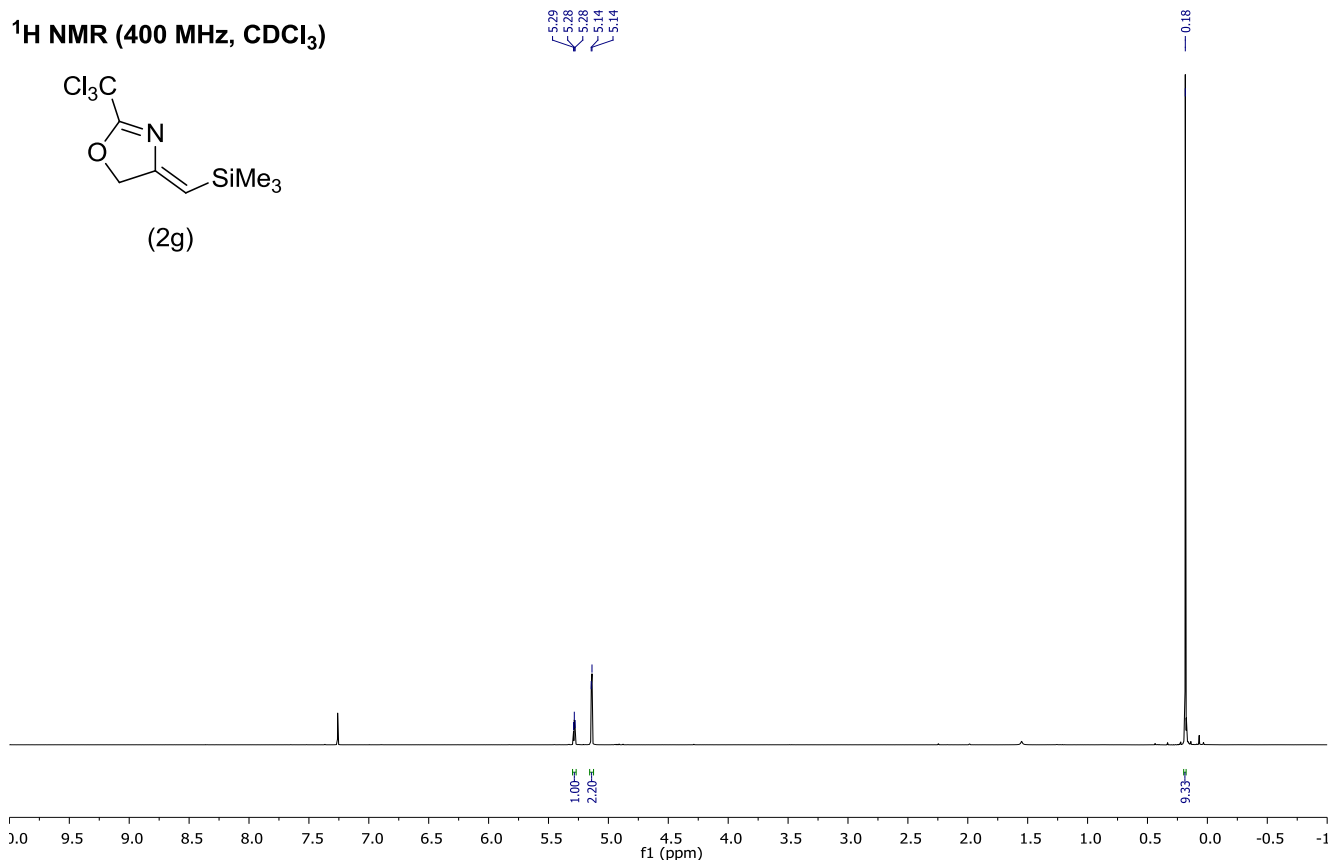

**<sup>13</sup>C NMR (100 MHz, CDCl<sub>3</sub>)**

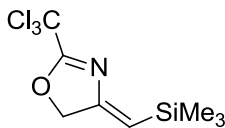

(2g)

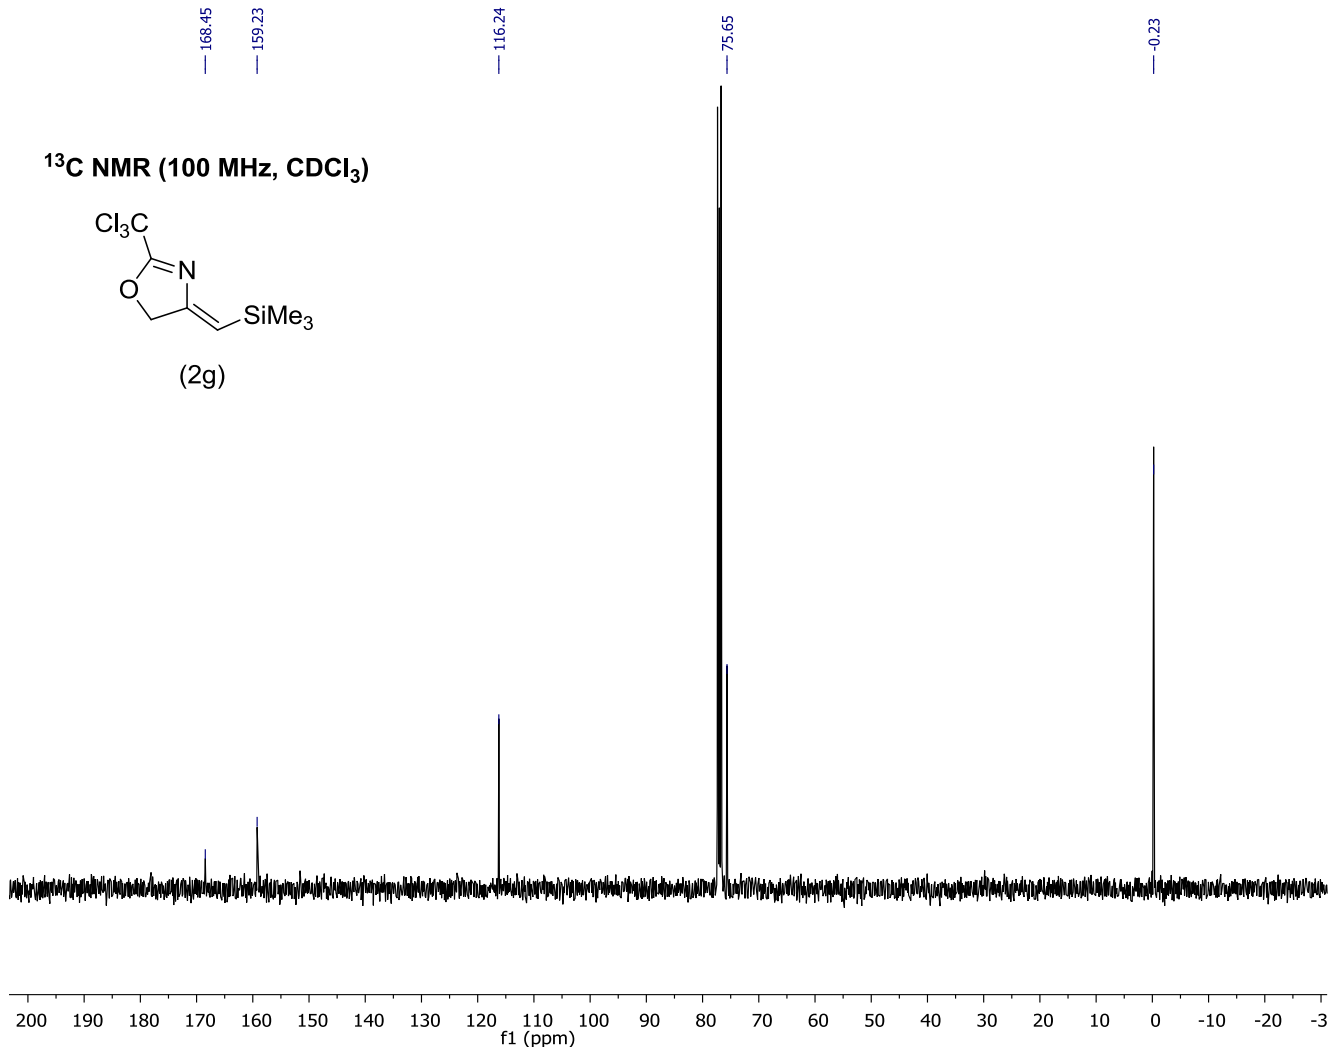



**<sup>1</sup>H NMR (400 MHz, CDCl<sub>3</sub>)**

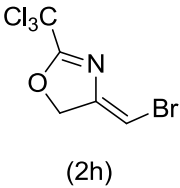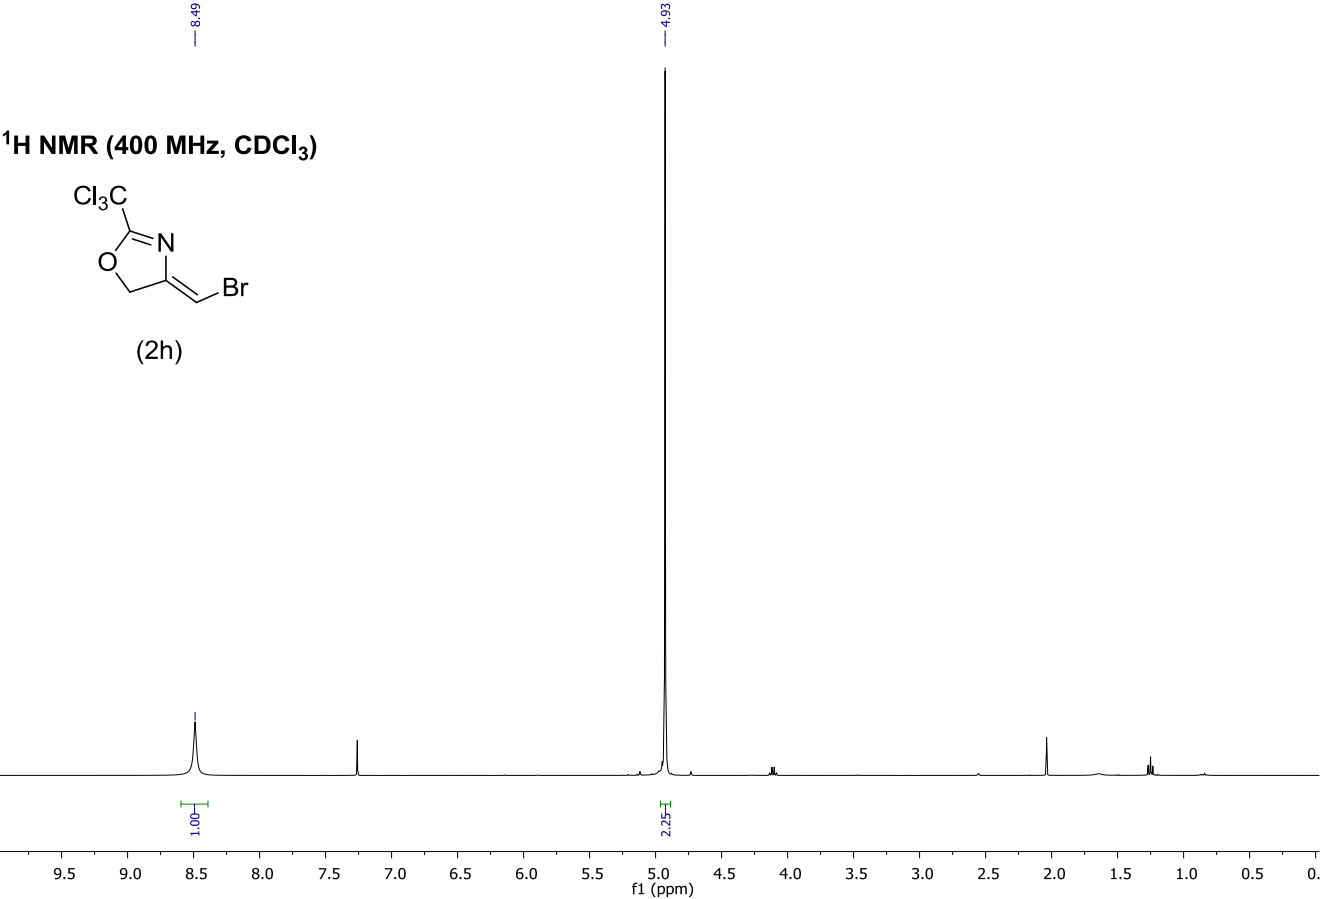

**<sup>13</sup>C NMR (100 MHz, CDCl<sub>3</sub>)**

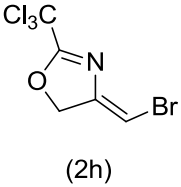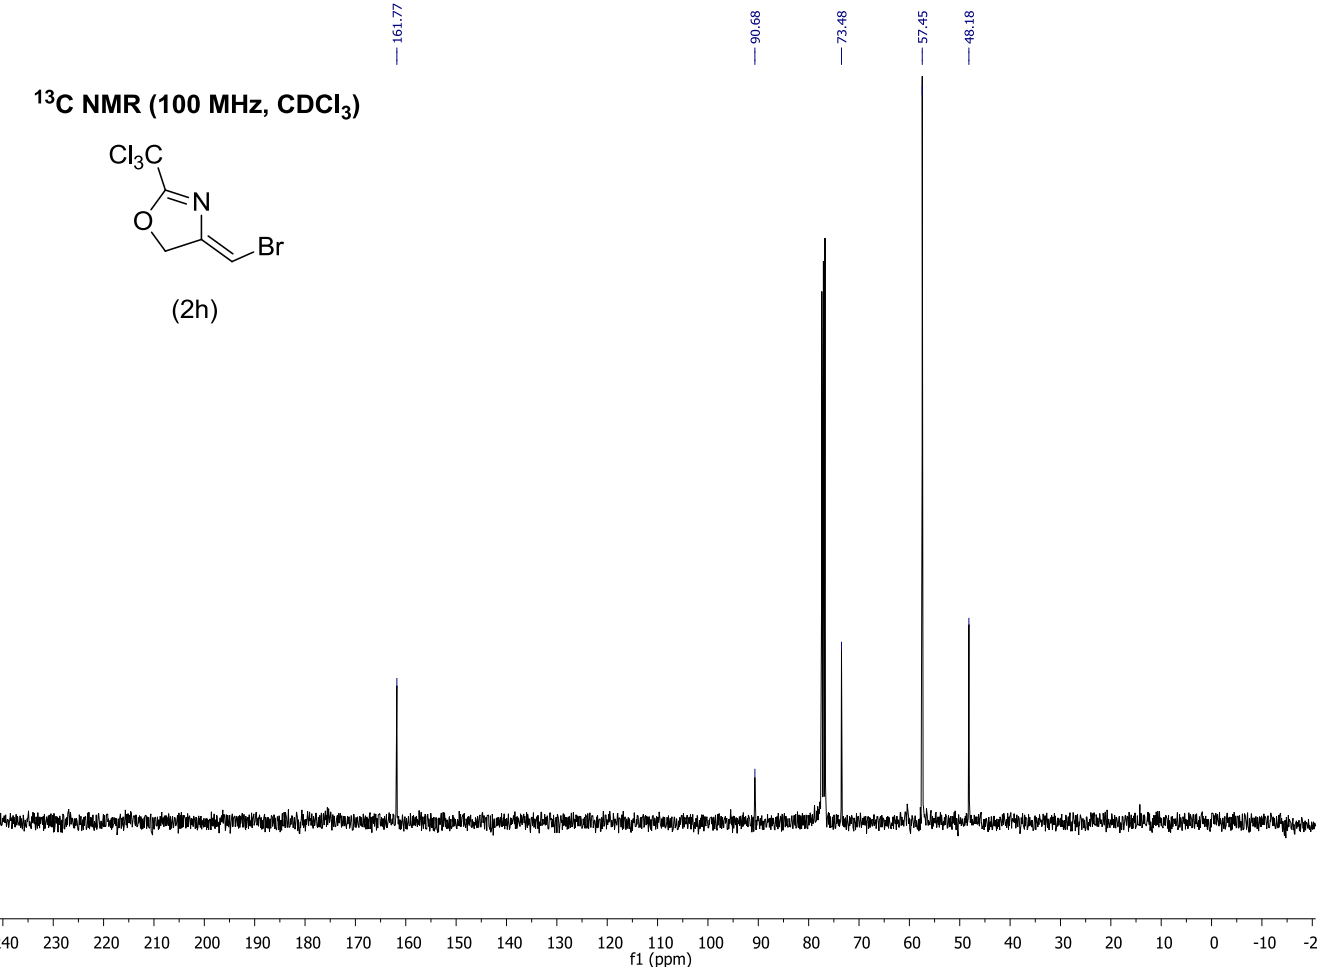

**<sup>1</sup>H NMR (400 MHz, CDCl<sub>3</sub>)**

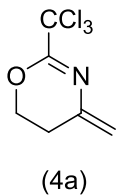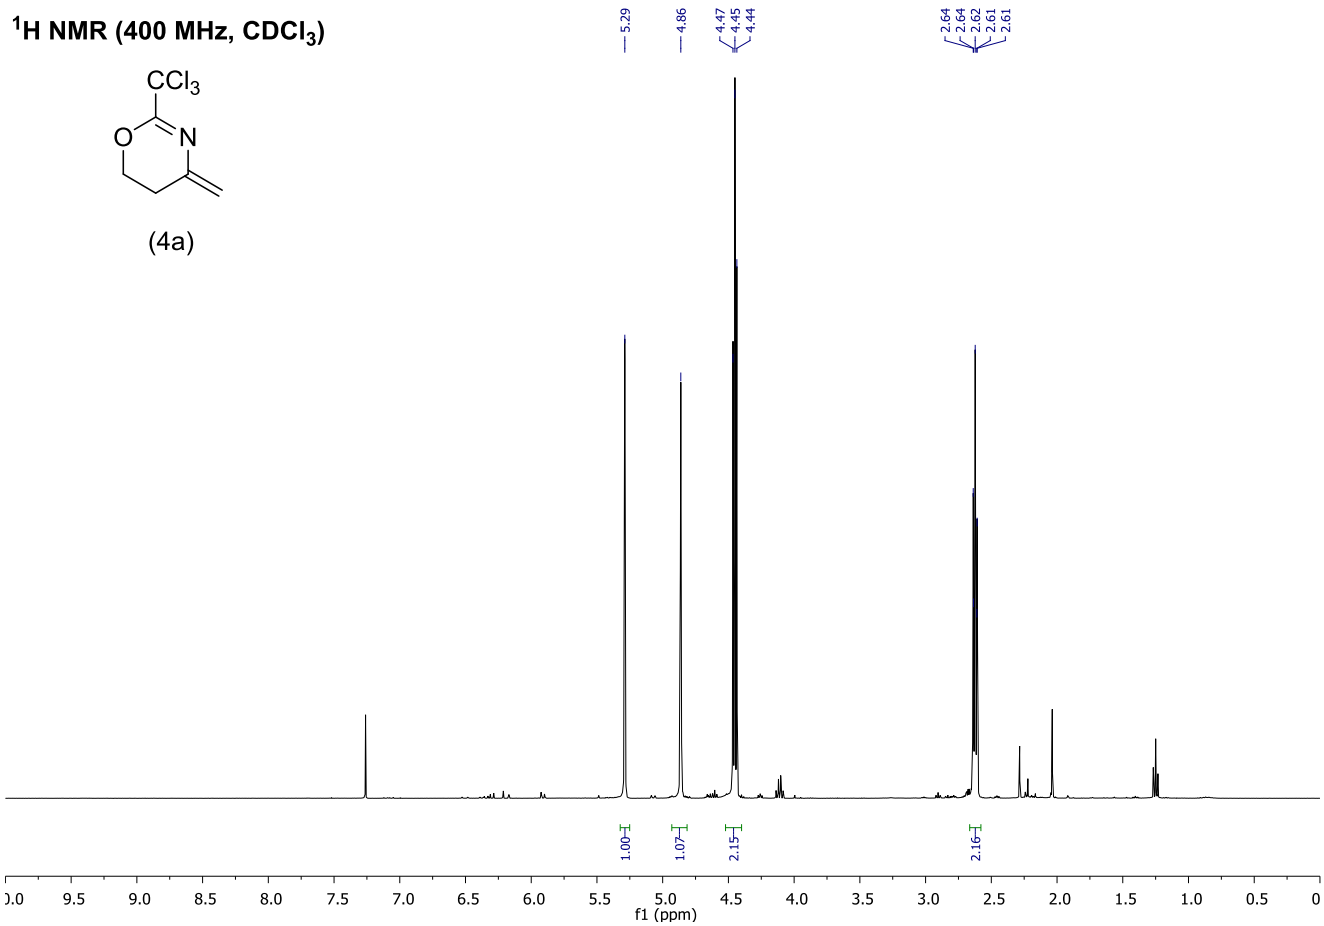

**<sup>13</sup>C NMR (100 MHz, CDCl<sub>3</sub>)**

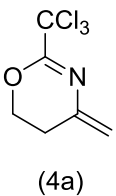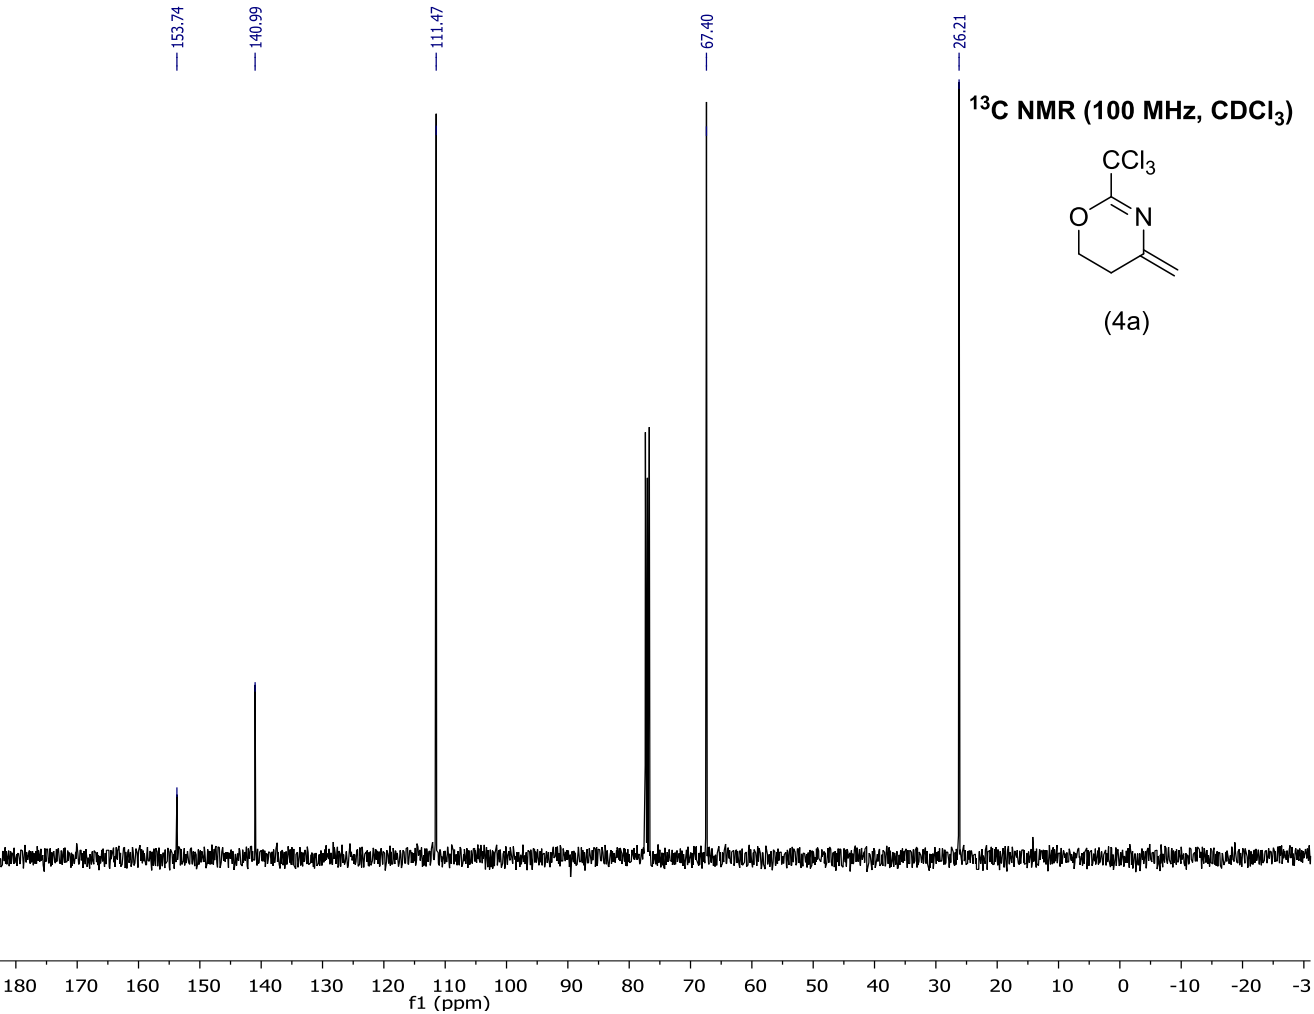

**<sup>1</sup>H NMR (400 MHz, CDCl<sub>3</sub>)**

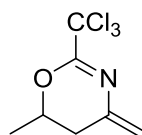

(4b)

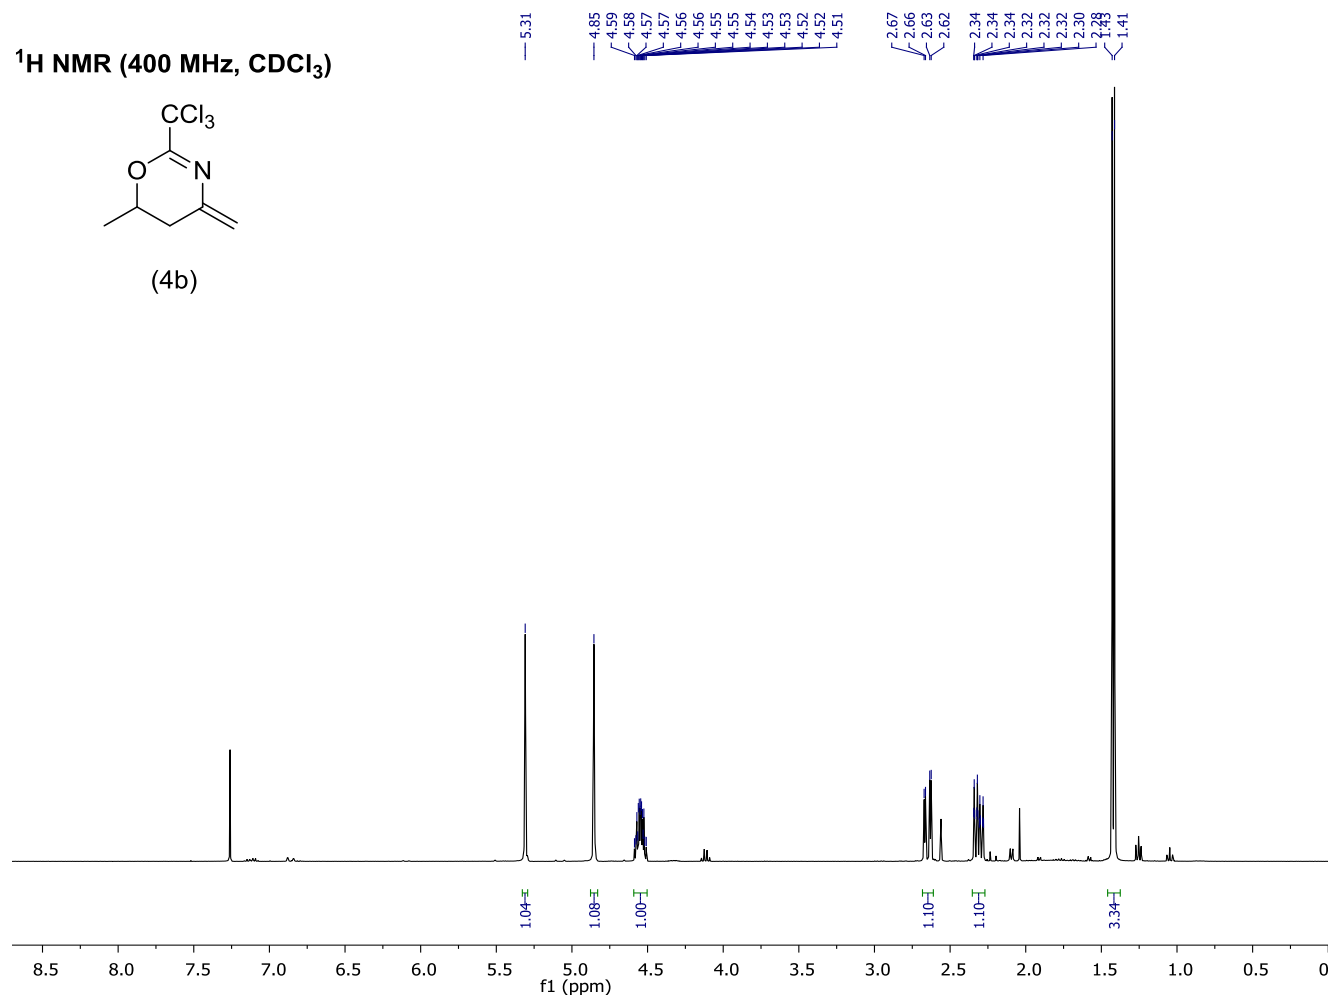

**<sup>13</sup>C NMR (100 MHz, CDCl<sub>3</sub>)**

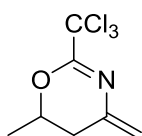

(4b)

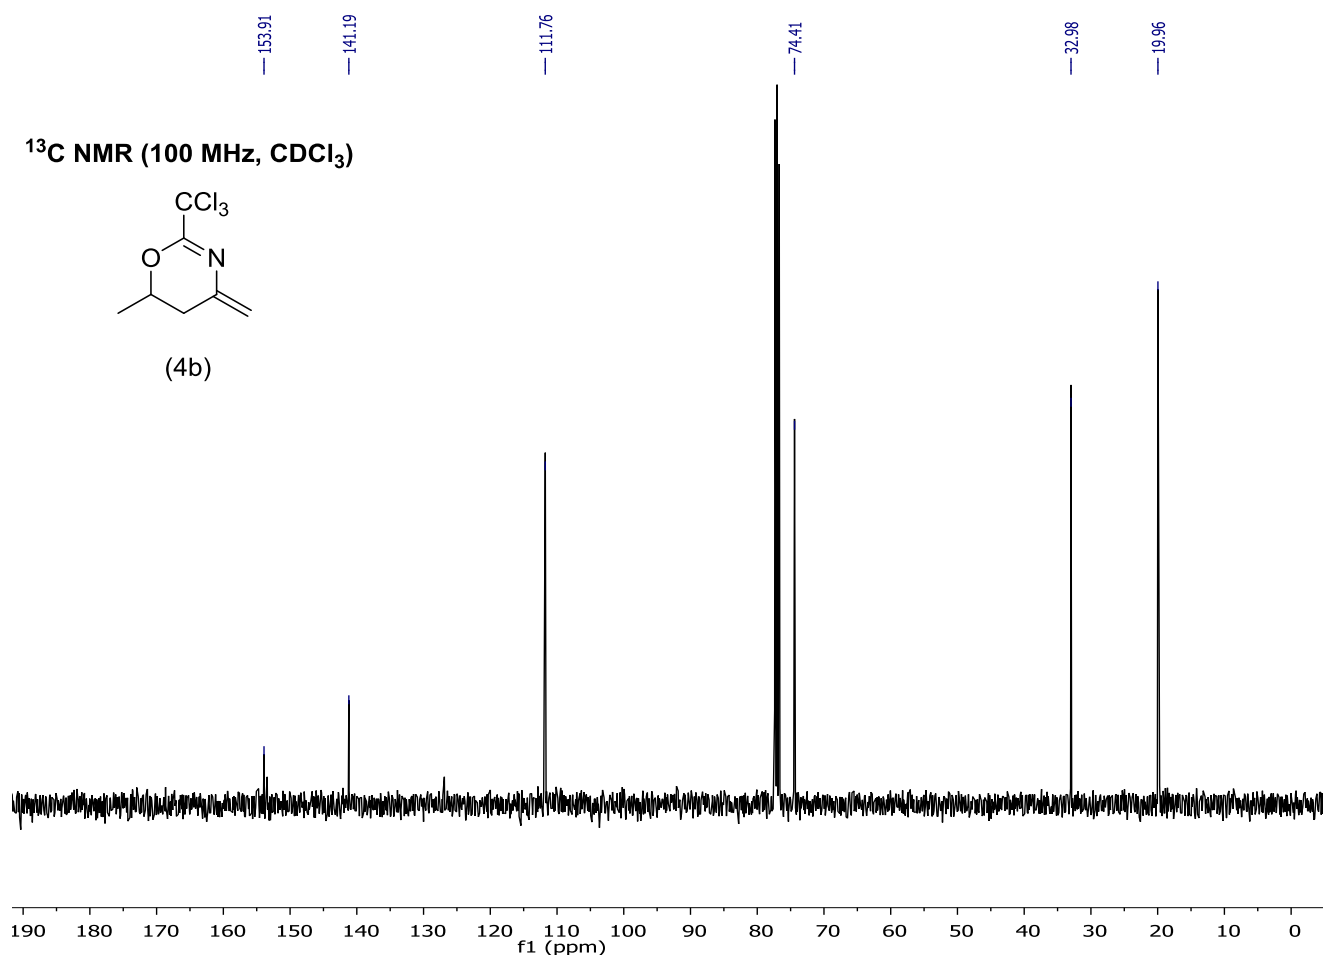

**<sup>1</sup>H NMR (400 MHz, CDCl<sub>3</sub>)**

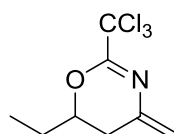

(4c)

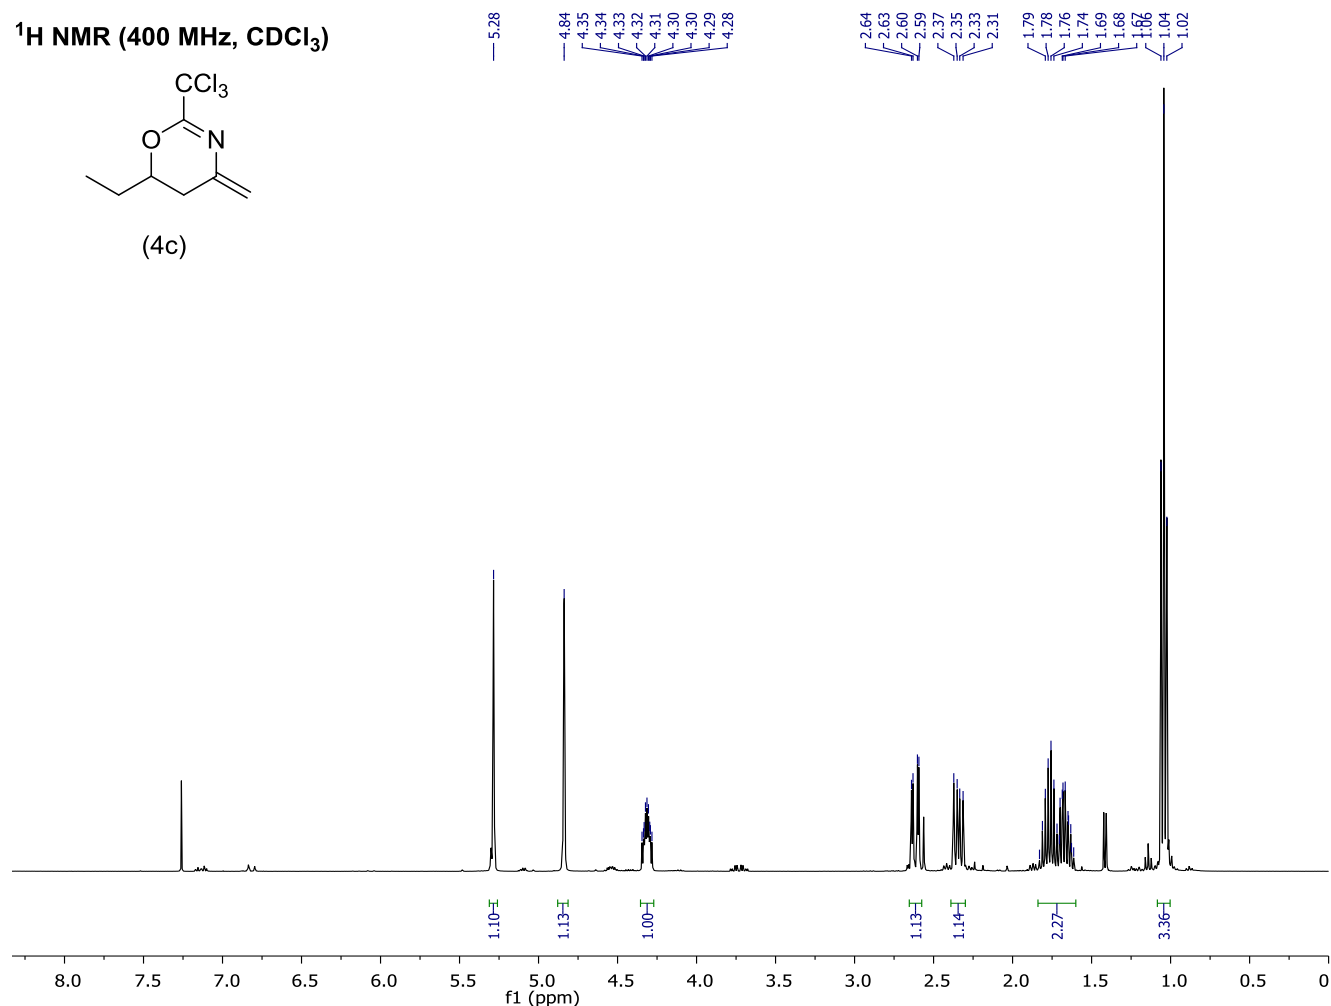

**<sup>13</sup>C NMR (100 MHz, CDCl<sub>3</sub>)**

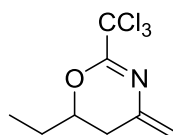

(4c)

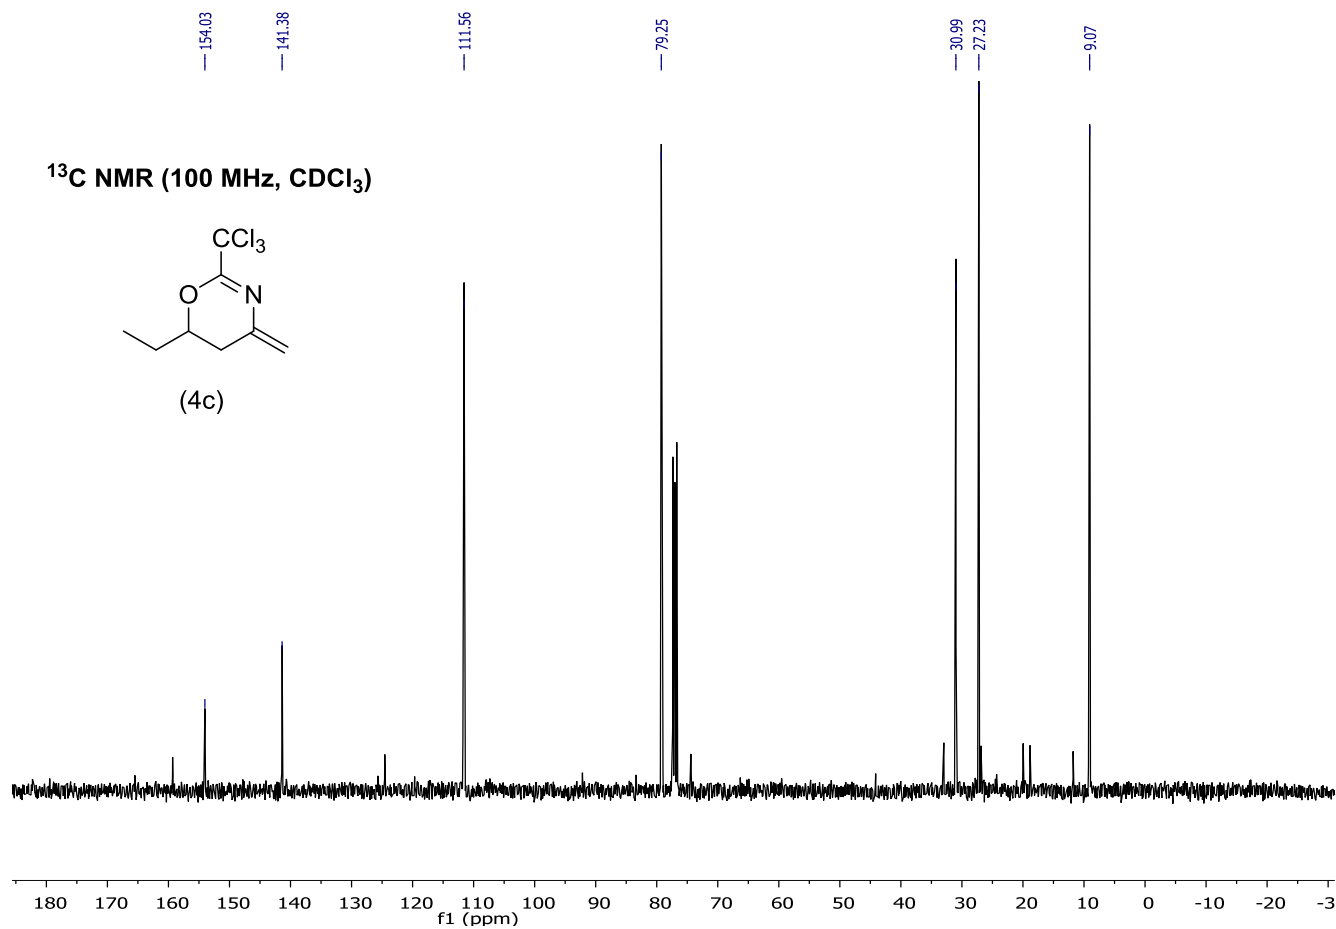

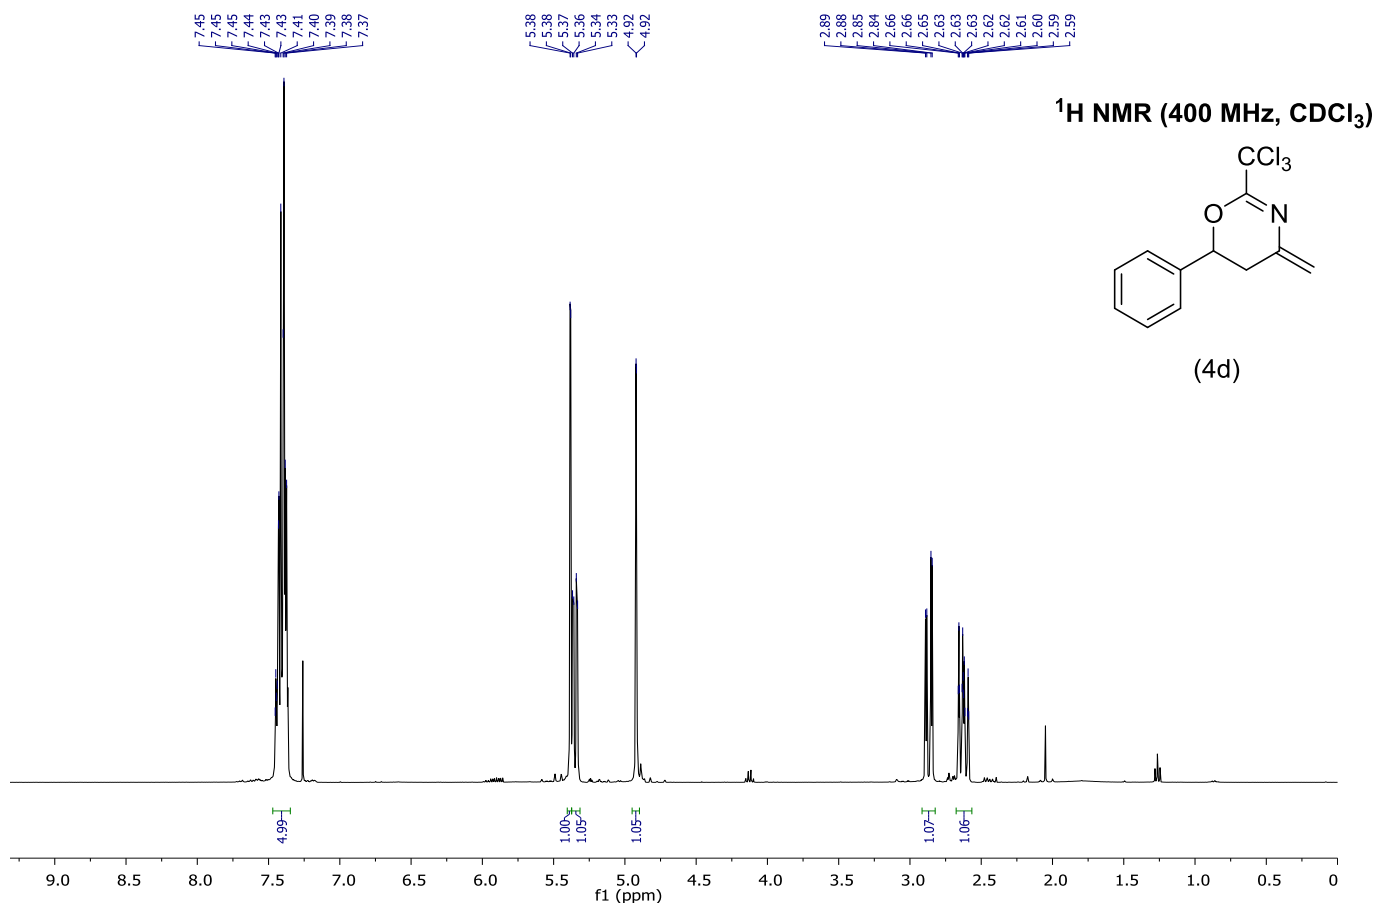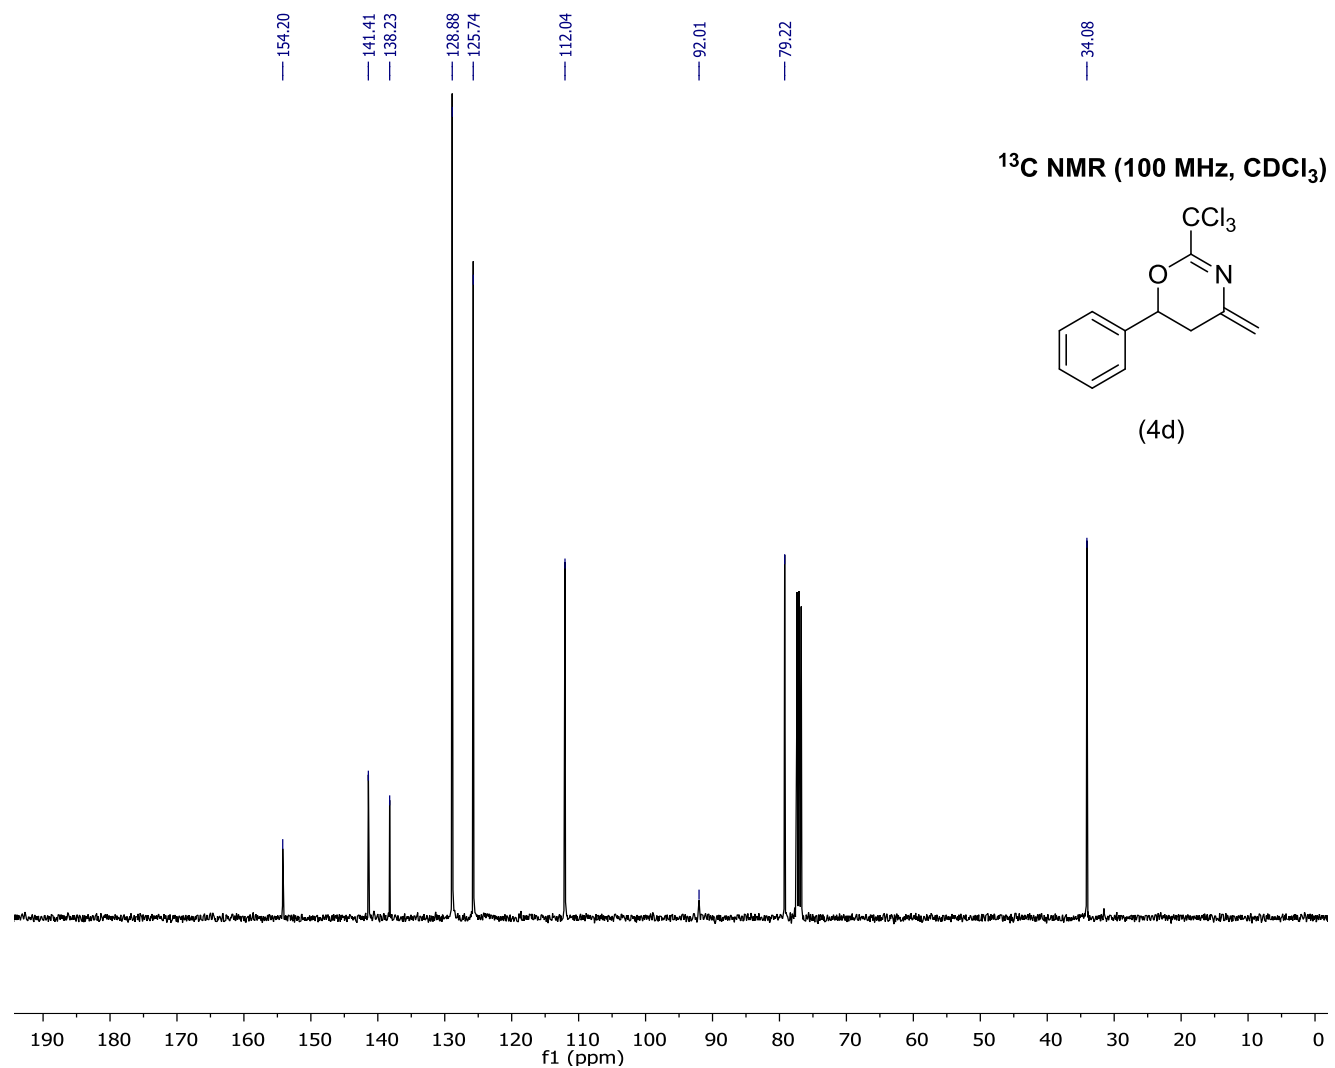

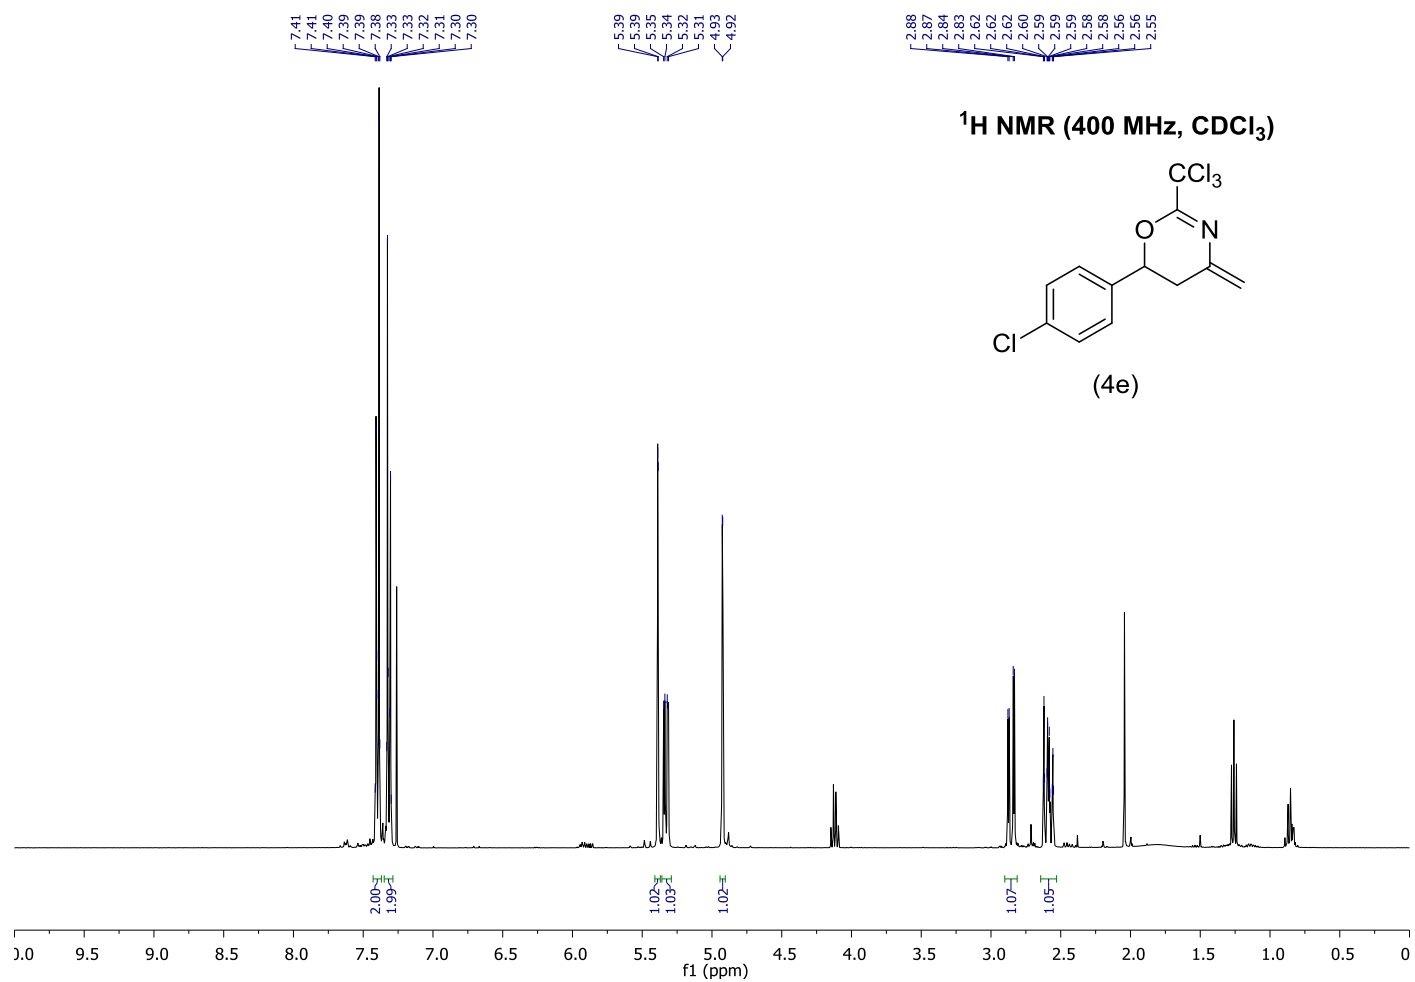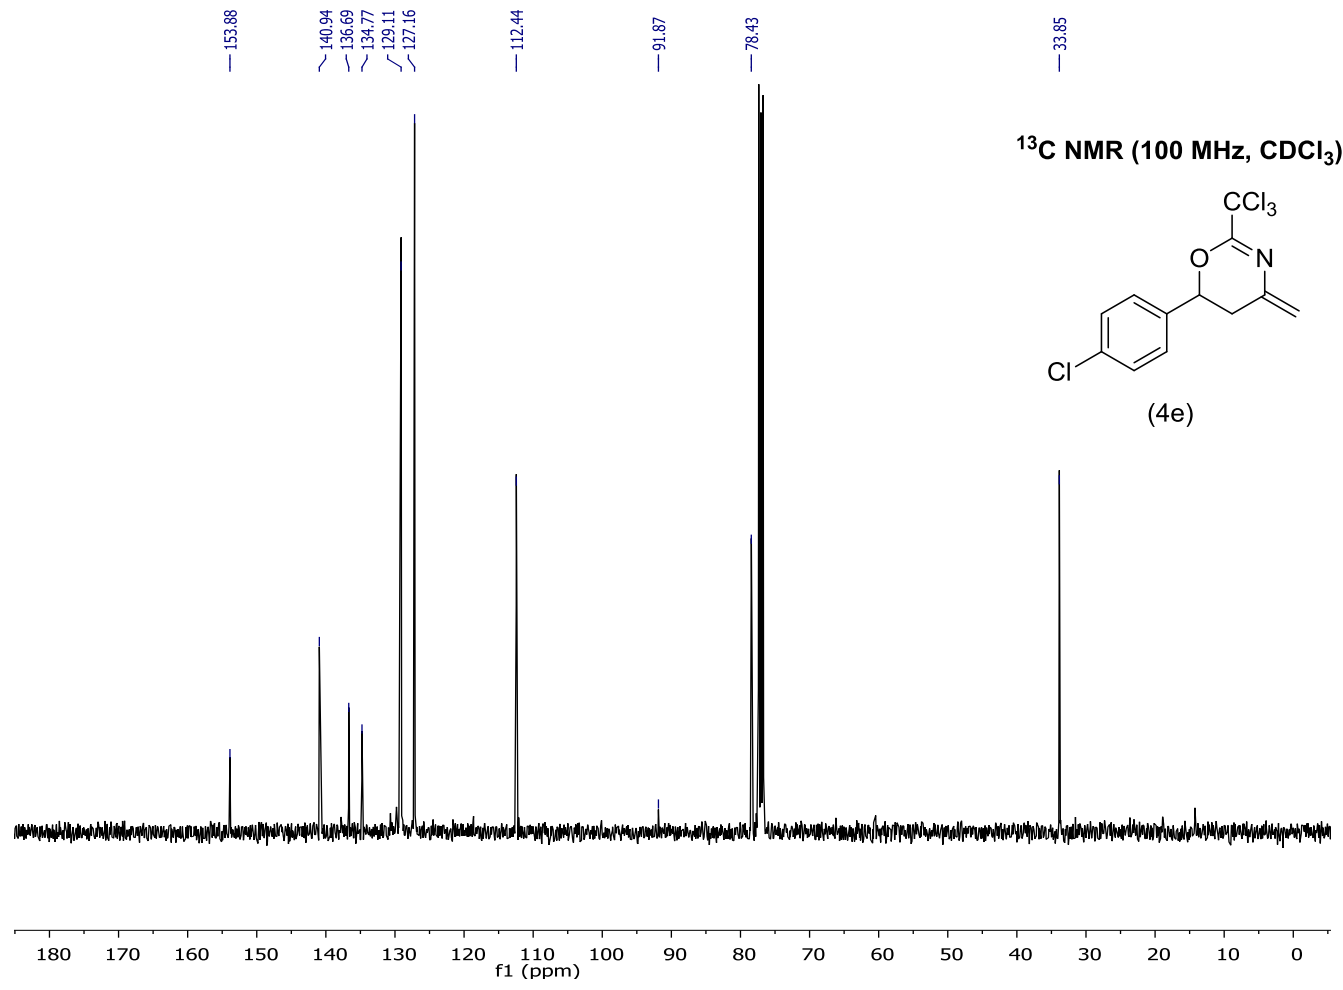

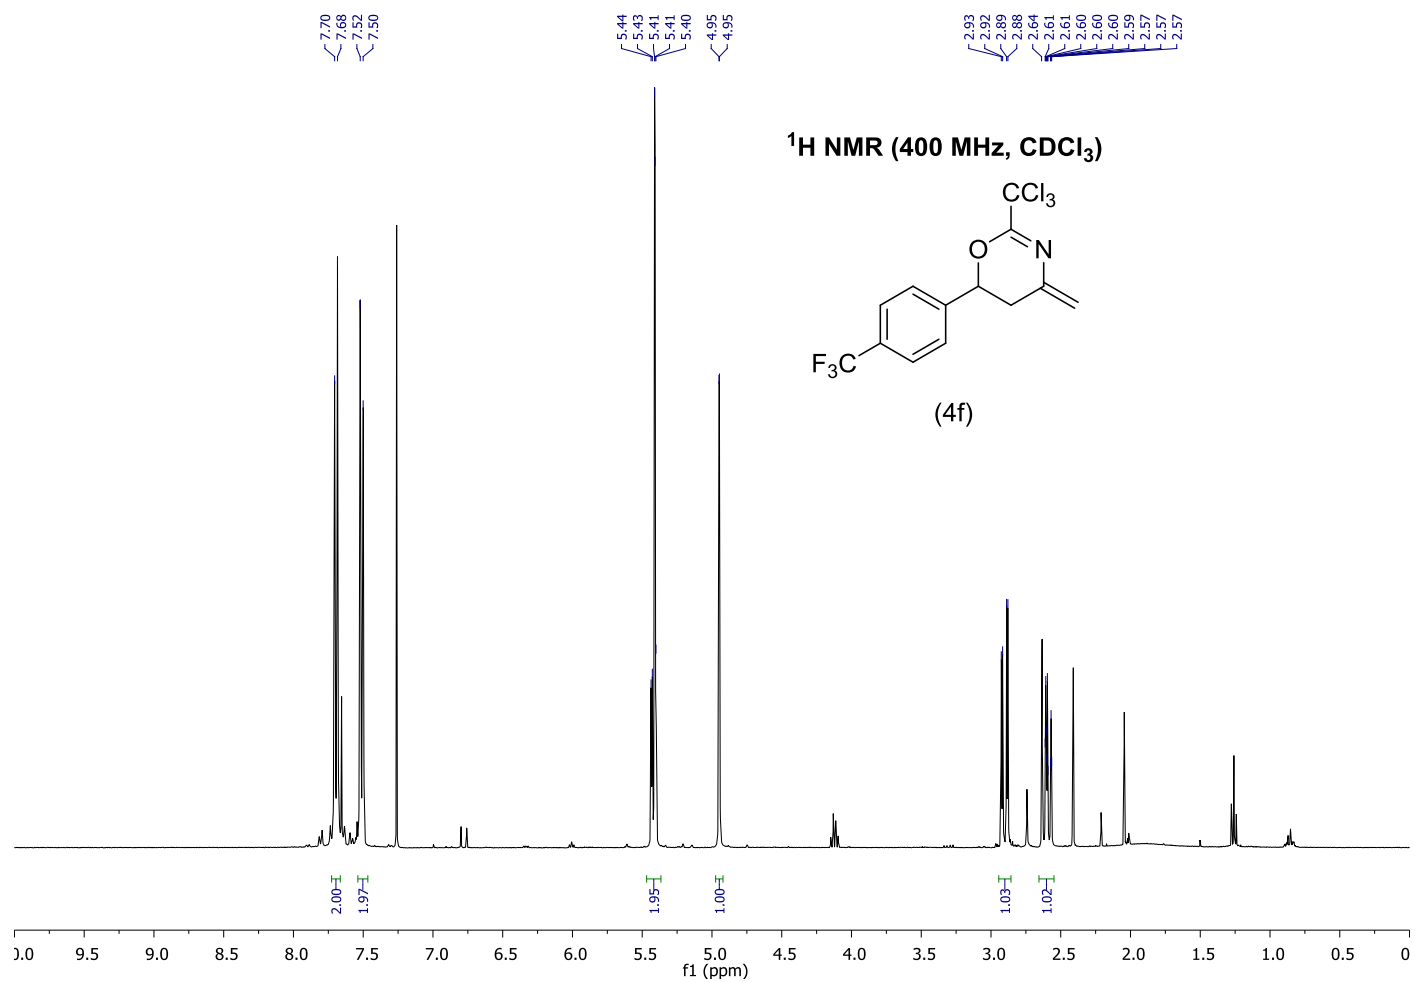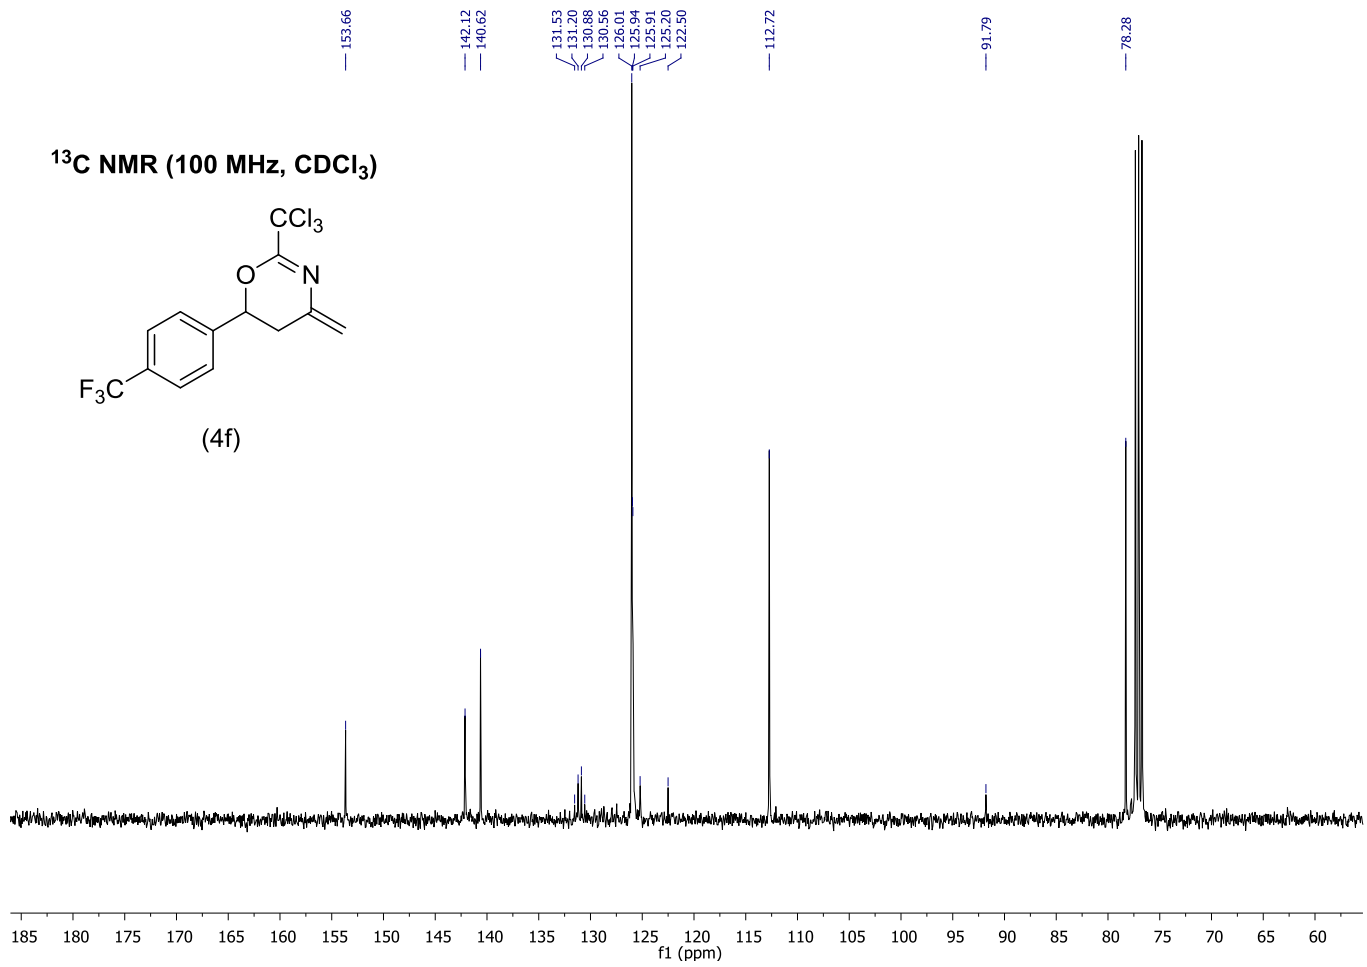

**<sup>1</sup>H NMR (400 MHz, CDCl<sub>3</sub>)**

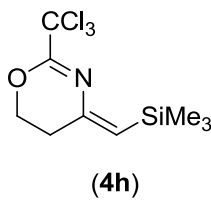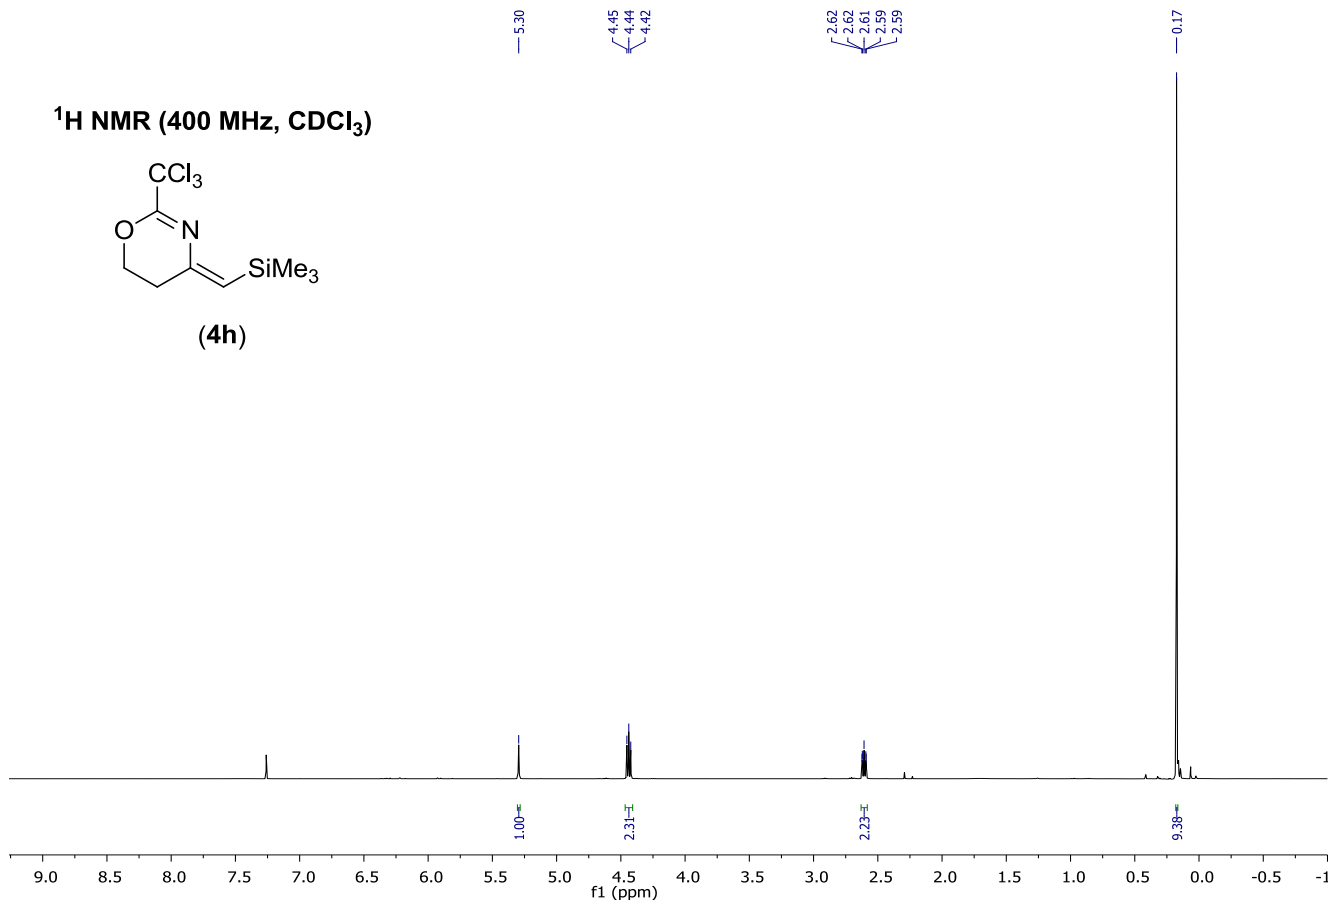

**<sup>13</sup>C NMR (100 MHz, CDCl<sub>3</sub>)**

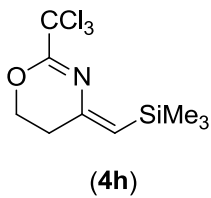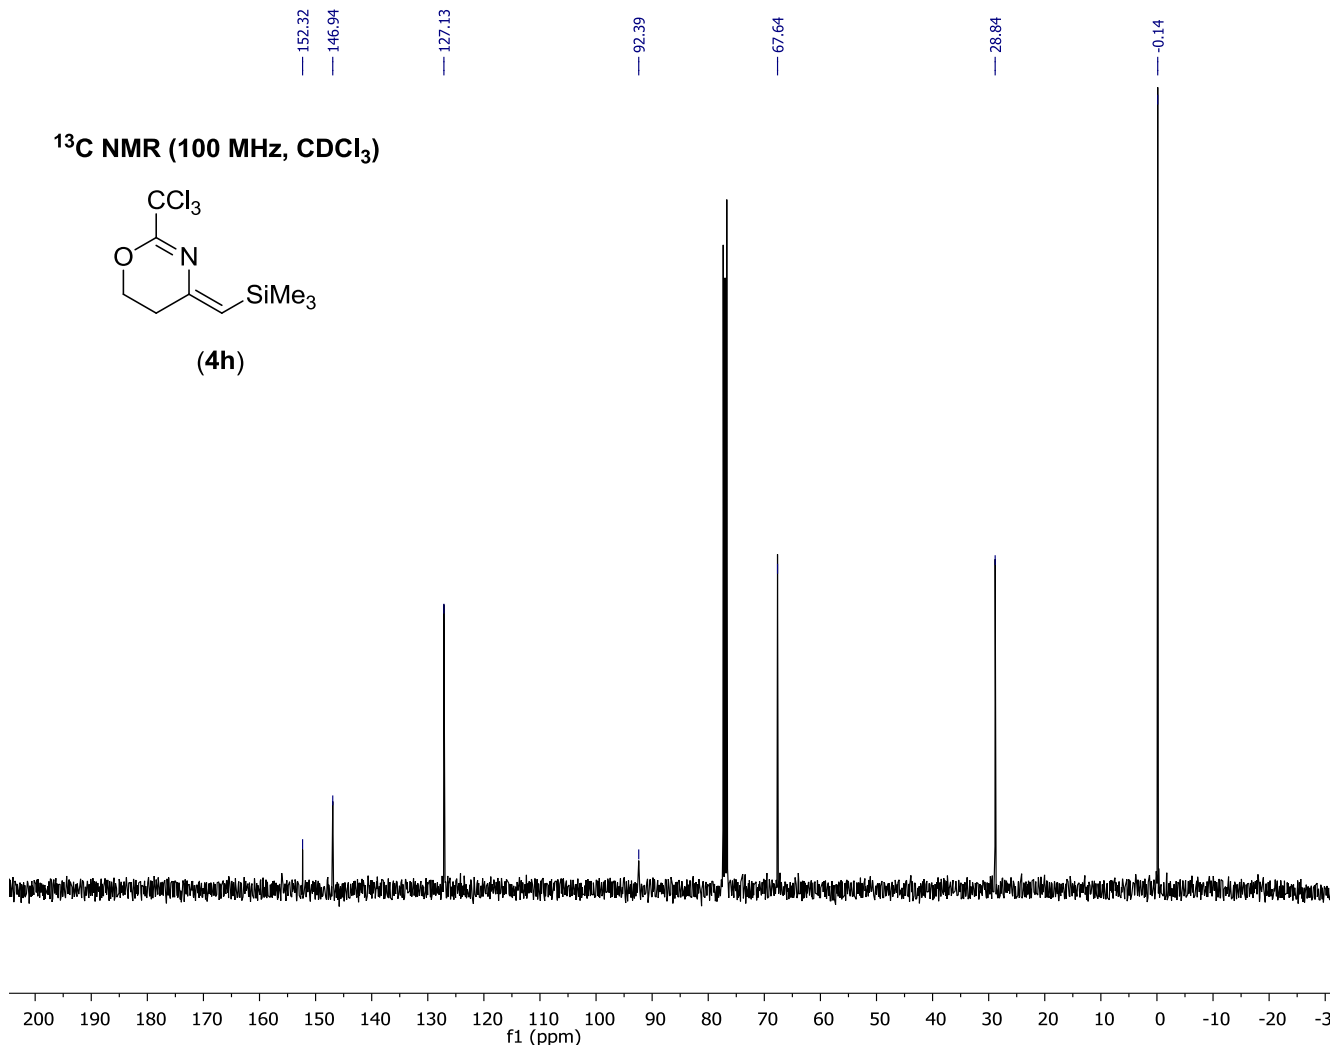



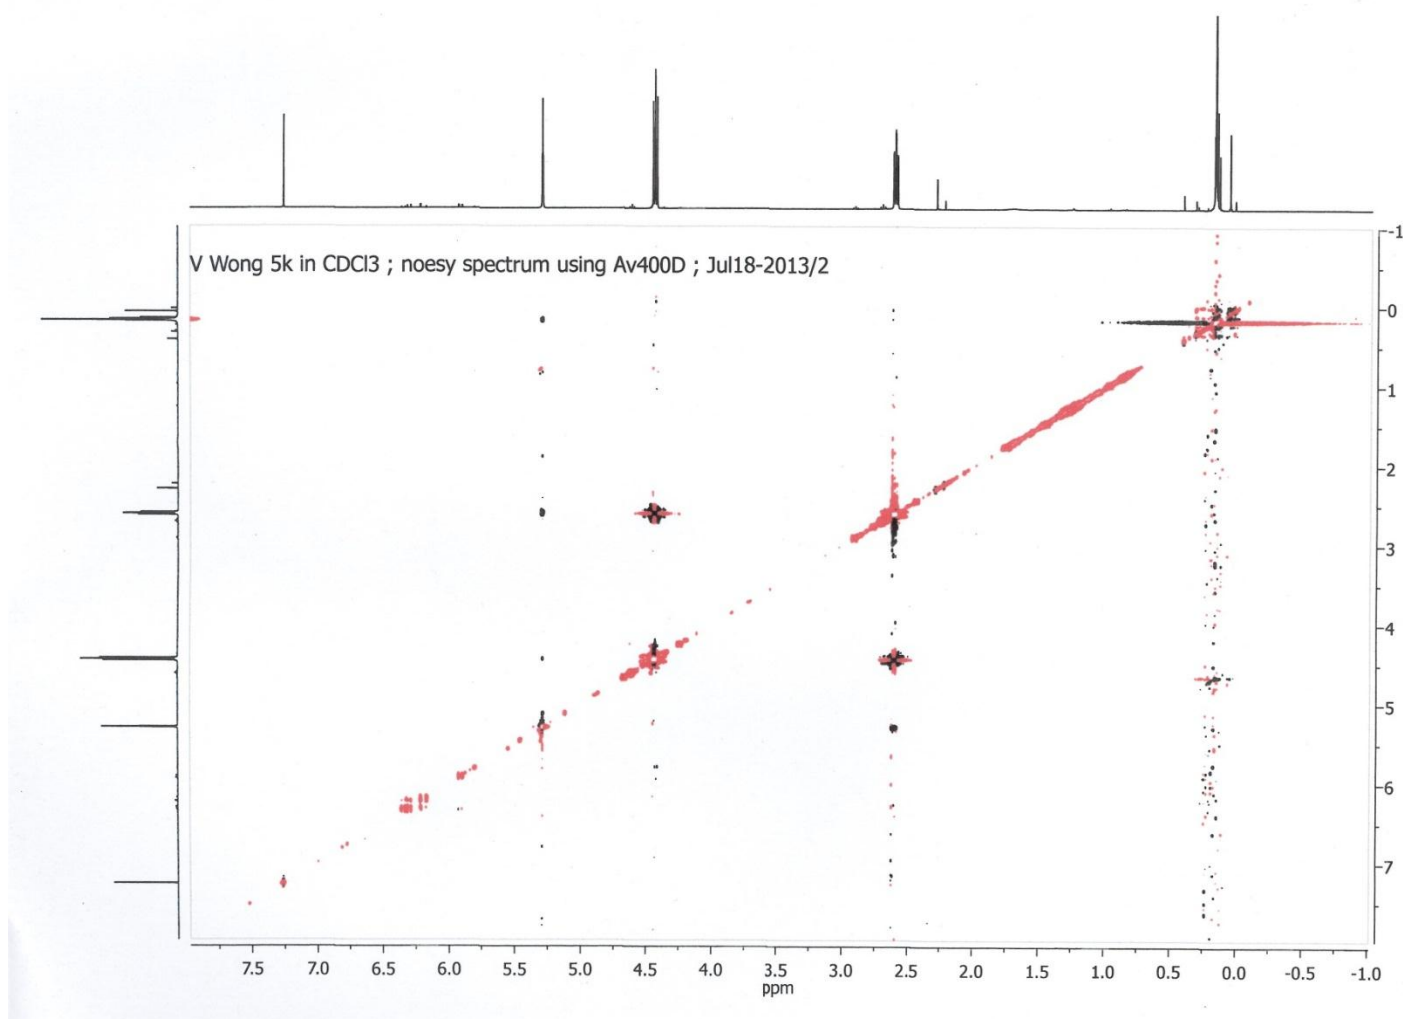

NOESY spectrum for compound **4h**, showing distinct cross peaks between the alkenyl proton with TMS and methylene protons in the heterocyclic ring.
